# Supplementary material for: Expedient synthesis of new cinnoline diones by Ru-catalyzed regioselective unexpected deoxygenation-oxidative annulation of propargyl alcohols with phthalazinones and pyridazinones
Source: Royal Society of Chemistry journal article supplement (doi:10.1039/c5cc09347c), 2015-12-14
Supplement: c5cc09347c1.pdf [file c5cc09347c1.pdf]

## Supporting Information

### Expedient Synthesis of New Cinnolinediones by Ru-Catalyzed Regioselective Unexpected Deoxygenation-Oxidative Annulation of Propargyl Alcohols with Phthalazinones and Pyridazinones

Subramani Rajkumar,<sup>a</sup> S. Antony Savarimuthu,<sup>b</sup> Rajendran Senthil Kumaran,<sup>c</sup> C. M. Nagaraja<sup>d</sup> and Thirumanavelan Gandhi\*<sup>a</sup>

<sup>a</sup>Materials Chemistry Division, School of Advanced Sciences, VIT University, Tamil Nadu 632014 (India)

Email: velan.g@vit.ac.in

<sup>b</sup>Department of Chemistry, St. Xavier's College, Palayamkottai, Tamil Nadu 627002 (India)

<sup>c</sup>Syngene International Limited, Biocon, Bangalore, 560099 (India)

<sup>d</sup>Department of Chemistry, Indian Institute of Technology Ropar, Punjab 140001 (India)

### Table of Contents

| Section | Title                                                                           | Page        |
|---------|---------------------------------------------------------------------------------|-------------|
| 1       | General consideration                                                           | S2          |
| 2       | Analytical information                                                          | S2          |
| 3       | Optimization table                                                              | S3          |
| 4       | General Synthetic procedure for deoxygenation/oxidative annulation              | S3          |
| 5       | Deoxygenation/oxidative annulation 3-phenylprop-2-yn-1-yl acetate.              | S5          |
| 6       | General Synthetic procedure for the preparation of ruthenacycle                 | S5          |
| 7       | General Synthetic procedure for the preparation of phthalazine/pyridazine dione | S5          |
| 8       | General Synthetic procedure for the preparation propargyl alcohol derivatives   | S6          |
| 9       | Characterization data                                                           | S7 - S104   |
| 10      | X-ray crystallographic data <b>3ae</b> & <b>8am</b>                             | S105 - S106 |
| 11      | References                                                                      | S107        |

## EXPERIMENTAL SECTION

### General Consideration

Unless otherwise mentioned, all the reactions were carried out in screw cap reaction tubes. All solvents and reagents were of pure analytical grade. Various ruthenium catalysts were prepared from literature procedure.<sup>1</sup> All palladium salts was bought from the Sigma Aldrich. The products were purified by column chromatography, silica gel (100-200 mesh or 200-420 mesh). A gradient elution using petroleum ether and ethyl acetate was performed based on pre-coated aluminum TLC sheets (silica gel 60F 254).

### Analytical information

All isolated compounds were characterized by <sup>1</sup>H, <sup>13</sup>C and HRMS. Compound **3ae** and **8am** was characterized by single crystal X-ray diffraction (Figure S1 & S2). Copies of the <sup>1</sup>H NMR, <sup>13</sup>C NMR, NOESY and NOE NMR can be found in this supporting information. All Nuclear Magnetic Resonance Spectra were recorded on 400 MHz and 100 MHz NMR instrument for <sup>1</sup>H and <sup>13</sup>C NMR respectively. All <sup>1</sup>H NMR spectra were reported in units ppm (parts per million), and were measured relative to the signals for residual chloroform (7.26 ppm) and DMSO (2.54 ppm) in the deuterated solvent. All <sup>13</sup>C NMR spectra were reported in ppm relative to deuterated chloroform (77.23 ppm) and DMSO (39.52 ppm). Coupling constants (*J*) are reported in Hz; splitting patterns are assigned s = singlet, d = doublet, t = triplet, q = quartet, quin = quintet; br = broad signal. High-resolution mass spectra (HRMS) were performed on TOF-Q analyser.

**Optimization Table:**

| Entry | Ru Catalyst<br>(5 mol %)                             | Oxidant<br>2 equiv   | Additives<br>(30 mol %) | Solvent<br>1.5 ml | Yield <sup>a</sup><br><b>3aa</b> |
|-------|------------------------------------------------------|----------------------|-------------------------|-------------------|----------------------------------|
| 1     | [RuCl <sub>2</sub> ( <i>p</i> -cymene)] <sub>2</sub> | -                    | NaOAc                   | Toluene           | -                                |
| 2     | [RuCl <sub>2</sub> ( <i>p</i> -cymene)] <sub>2</sub> | -                    | NaOAc                   | Dioxane           | -                                |
| 3     | [RuCl <sub>2</sub> ( <i>p</i> -cymene)] <sub>2</sub> | -                    | NaOAc                   | DCE               | -                                |
| 4     | [RuCl <sub>2</sub> ( <i>p</i> -cymene)] <sub>2</sub> | -                    | NaOAc                   | H <sub>2</sub> O  | -                                |
| 5     | [RuCl <sub>2</sub> ( <i>p</i> -cymene)] <sub>2</sub> | -                    | NaOAc                   | MeOH              | 22                               |
| 6     | [RuCl <sub>2</sub> ( <i>p</i> -cymene)] <sub>2</sub> | -                    | NaOAc                   | <i>t</i> -AmOH    | 30                               |
| 7     | [RuCl <sub>2</sub> ( <i>p</i> -cymene)] <sub>2</sub> | -                    | NaOAc                   | Acetic Acid       | 42                               |
| 8     | [RuCl <sub>2</sub> ( <i>p</i> -cymene)] <sub>2</sub> | Cu(OAc) <sub>2</sub> | NaOAc                   | Acetic Acid       | 50                               |
| 9     | [RuCl <sub>2</sub> ( <i>p</i> -cymene)] <sub>2</sub> | Cu(OAc) <sub>2</sub> | KOAc                    | Acetic Acid       | 44                               |
| 10    | [RuCl <sub>2</sub> ( <i>p</i> -cymene)] <sub>2</sub> | Cu(OAc) <sub>2</sub> | CsOAc                   | Acetic Acid       | 35                               |
| 11    | [RuCl <sub>2</sub> ( <i>p</i> -cymene)] <sub>2</sub> | Cu(OAc) <sub>2</sub> | AgOAc                   | Acetic Acid       | 60                               |
| 12    | [RuCl <sub>2</sub> ( <i>p</i> -cymene)] <sub>2</sub> | Cu(OAc) <sub>2</sub> | AgSbF <sub>6</sub>      | Acetic Acid       | 40                               |
| 13    | [RuCl <sub>2</sub> ( <i>p</i> -cymene)] <sub>2</sub> | Cu(OAc) <sub>2</sub> | KPF <sub>6</sub>        | Acetic Acid       | 83                               |
| 14    | [RuCl <sub>2</sub> ( <i>p</i> -cymene)] <sub>2</sub> | CuBr <sub>2</sub>    | KPF <sub>6</sub>        | Acetic Acid       | 45                               |
| 15    | [RuCl <sub>2</sub> ( <i>p</i> -cymene)] <sub>2</sub> | CuCl <sub>2</sub>    | KPF <sub>6</sub>        | Acetic Acid       | 22                               |
| 16    | RuCl <sub>3</sub> .XH <sub>2</sub> O                 | Cu(OAc) <sub>2</sub> | KPF <sub>6</sub>        | Acetic Acid       | -                                |
| 17    | RuCl <sub>2</sub> (PPh <sub>3</sub> ) <sub>3</sub>   | Cu(OAc) <sub>2</sub> | KPF <sub>6</sub>        | Acetic Acid       | trace                            |
| 18    | [Ru(COD)Cl <sub>2</sub> ] <sub>n</sub>               | Cu(OAc) <sub>2</sub> | KPF <sub>6</sub>        | Acetic Acid       | trace                            |
| 19    | Ru(DMSO) <sub>4</sub> Cl <sub>2</sub>                | Cu(OAc) <sub>2</sub> | KPF <sub>6</sub>        | Acetic Acid       | -                                |
| 20    | -                                                    | Cu(OAc) <sub>2</sub> | -                       | Acetic Acid       | -                                |
| 21    | -                                                    | Cu(OAc) <sub>2</sub> | KPF <sub>6</sub>        | Acetic Acid       | -                                |

Unless otherwise mentioned all the reactions were carried out with **1a** (0.2 mmol), **2a** (0.22 mmol), catalyst (5 mol %), solvent (1.5 mL), additive (30 mol %), oxidant (2 equiv), 110 °C, 8 h. <sup>a</sup>Isolated yields.

**General Synthetic procedure for deoxygenation/oxidative annulation:****Deoxygenation/oxidative annulation primary propargyl alcohol.**

In an oven-dried, vial equipped with stirring bar, were placed 2-phenyl-2,3-dihydrophthalazine-1,4-dione/1-phenyl-1,2-dihydropyridazine-3,6-dione (0.2 mmol), and 3-phenylprop-2-yn-1-ol (primary propargyl alcohol) (0.22 mmol), [RuCl<sub>2</sub>(*p*-cymene)]<sub>2</sub> (5 mol %, 0.01mmol), KPF<sub>6</sub> (30 mol %, 0.06 mmol) and copper(II)acetate (0.4 mmol) in acetic acid (1.5 mL). The mixture stirred for 10 min at room temperature, sealed with a Teflon-lined cap, and heated at 110 °C with stirring for 8h. After cooling the ambient temperature, the reaction mixture was diluted with ethyl acetate and filtered through celite and silica gel, and the filtrate was concentrated under reduced pressure. The crude residue was purified through a silica gel column using hexane and ethyl acetate as an eluent.

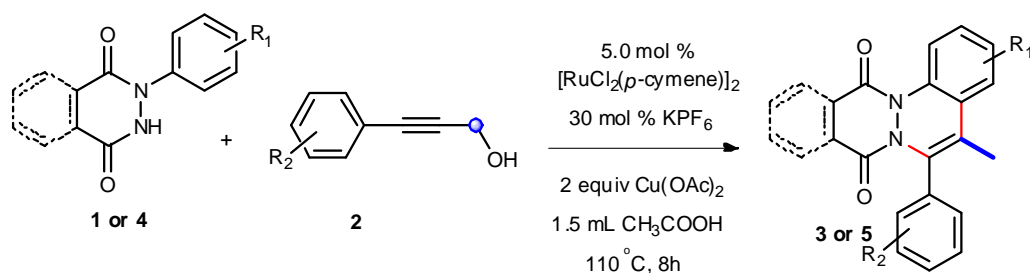

### Deoxygenation/oxidative annulation secondary propargyl alcohol.

In an oven-dried, vial equipped with stirring bar, were placed 2-phenyl-2,3-dihydrophthalazine-1,4-dione/1-phenyl-1,2-dihydropyridazine-3,6-dione (0.2 mmol), and secondary propargyl alcohol (0.22 mmol),  $[\text{RuCl}_2(p\text{-cymene})]_2$  (5 mol %, 0.01mmol),  $\text{KPF}_6$  (30 mol %, 0.06 mmol) and copper(II)acetate (0.4 mmol) in acetic acid (1.5 mL). The mixture stirred for 10 min at room temperature, sealed with a Teflon-lined cap, and heated at 110 °C with stirring for 8h. After cooling the ambient temperature, the reaction mixture was diluted with ethyl acetate and filtered through celite and silica gel, and the filtrate was concentrated under reduced pressure. The crude residue was purified through a silica gel column using hexane and ethyl acetate as an eluent.

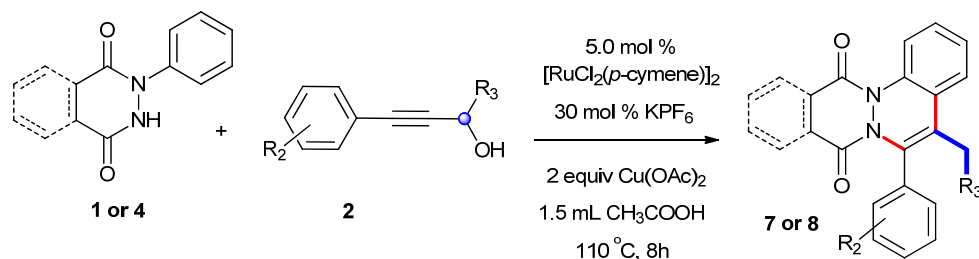

### Deoxygenation/oxidative annulation tertiary propargyl alcohol.

In an oven-dried, vial equipped with stirring bar, were placed 2-phenyl-2,3-dihydrophthalazine-1,4-dione/1-phenyl-1,2-dihydropyridazine-3,6-dione (0.2 mmol), and tertiary propargyl alcohol (0.22 mmol),  $[\text{RuCl}_2(p\text{-cymene})]_2$  (5 mol %, 0.01mmol),  $\text{KPF}_6$  (30 mol %, 0.06 mmol) and copper(II)acetate (0.4 mmol) in acetic acid (1.5 mL). The mixture stirred for 10 min at room temperature, sealed with a Teflon-lined cap, and heated at 100 °C with stirring for 8h. After cooling the ambient temperature, the reaction mixture was diluted with ethyl acetate and filtered through celite and silica gel, and the filtrate was concentrated under reduced pressure. The crude residue was purified through a silica gel column using hexane and ethyl acetate, the expected deoxygenation-oxidative annulated product was not observed.

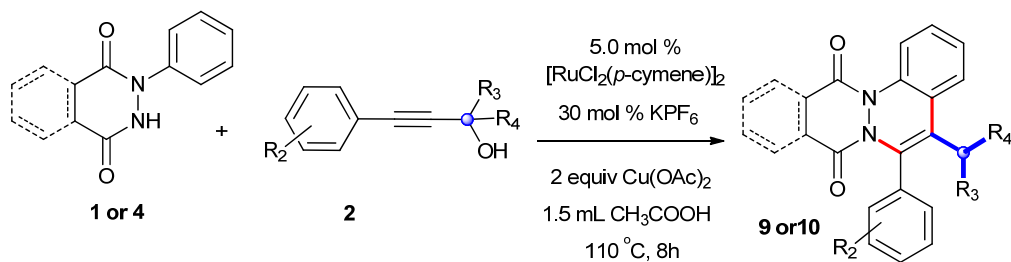

Not observed

### Deoxygenation/oxidative annulation 3-phenylprop-2-yn-1-yl acetate.

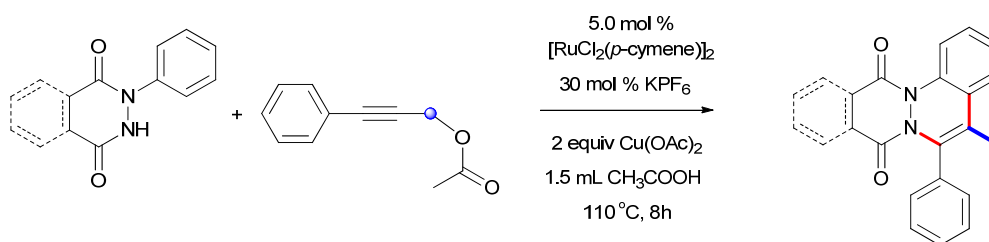

In an oven-dried, vial equipped with stirring bar, were placed 2-phenyl-2,3-dihydrophthalazine-1,4-dione/1-phenyl-1,2-dihydropyridazine-3,6-dione (0.2 mmol), and 3-phenylprop-2-yn-1-yl acetate (0.2 mmol), [RuCl<sub>2</sub>(*p*-cymene)]<sub>2</sub> (5 mol %, 0.01 mmol), KPF<sub>6</sub> (30 mol %, 0.06 mmol) and copper(II)acetate (0.4 mmol) in acetic acid (1.5 mL). The mixture stirred for 10 min at room temperature, sealed with a Teflon-lined cap, and heated at 110 °C with stirring for 8 h. After cooling the ambient temperature, the reaction mixture was diluted with ethyl acetate and filtered through celite and silica gel, and the filtrate was concentrated under reduced pressure. The crude residue was purified through a silica gel column using hexane and ethyl acetate as an eluent.

### General Synthetic procedure for the preparation of ruthenacycle

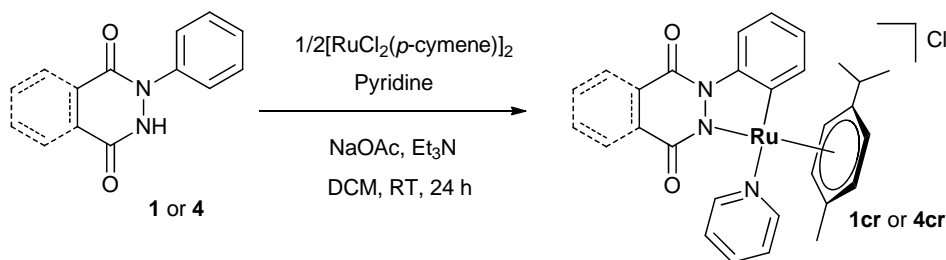

Ruthenacycle complexes were synthesized by reported procedure.<sup>2</sup> Briefly a mixture of pyridine (28.4 mg, 0.36 mmol) was added to a solution of [RuCl<sub>2</sub>(*p*-cymene)]<sub>2</sub> (111.2 mg, 0.18 mmol) in DCM (10.0 mL) at RT. After vigorous stirring for 3 h, NaOAc (36.9 mg, 0.45 mmol) and **1a** or **4a** (0.3 mmol) were added to the solution with Et<sub>3</sub>N (1.0 mL), and vigorous stirring was continued for 20 h. When the reaction was complete, the solution was transferred to a round-bottom flask. Silica was added to the flask and all volatiles were evaporated under reduced pressure. The crude product was purified by column chromatography on silica gel using DCM/MeOH as a solvent.

### General Synthetic procedure for the preparation of phthalazine/pyridazine dione

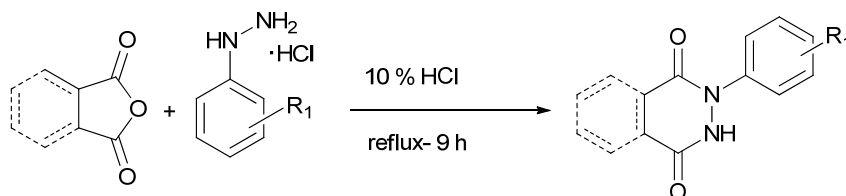

The appropriate phenylhydrazine (1.1 equiv) was added in one portion to a stirred mixture of phthalic/malonic anhydride (1.0 equiv) in 10% HCl at room temperature. The mixture was heated to 120

°C for 9 h after it was cooled, the resulting solid was collected by filtration washed with water and recrystallized by using ethanol. Yield (60-80%).<sup>3</sup>

### General Synthetic procedure for the preparation propargyl alcohol derivatives

#### a) Primary propargyl alcohol

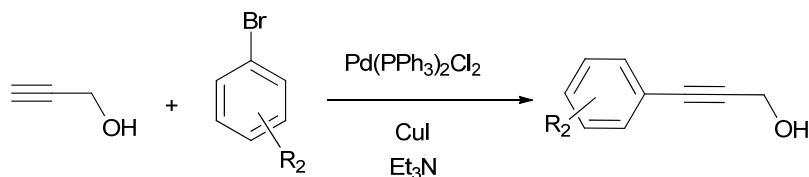

To a round bottom flask was added Pd(PPh<sub>3</sub>)<sub>2</sub>Cl<sub>2</sub> and CuI. The flask was purged with N<sub>2</sub> for 5 minutes, and Et<sub>3</sub>N was transferred via cannula under N<sub>2</sub>. The aryl halide was then added and the mixture was allowed to stir for 10 minute, and followed by addition of prop-2-yn-1-ol. The reaction mixture was stirred at room temperature or heated as necessary, and the reaction progress monitored by TLC. Upon completion, the crude mixture was filtered through a medium frit, the solid residue washed with Et<sub>3</sub>N and ethyl acetate, and the combined organics were concentrated under reduced pressure. Purification via flash column chromatography yielded the desired aryl propargyl alcohols.<sup>4</sup>

#### b) Secondary and tertiary propargyl alcohol<sup>5</sup>

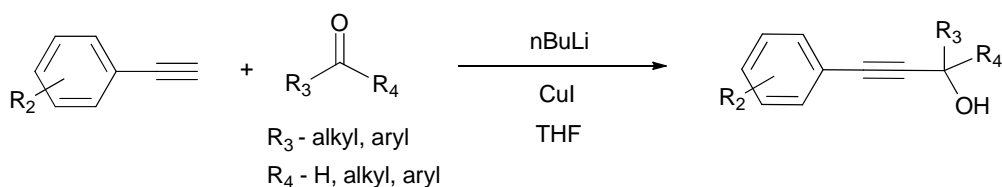

Under nitrogen atmosphere *n*-BuLi (0.12 mL, 2.5M in hexane) was added into a solution of an alkyne (0.35 mmol) in 3 ml of dry THF at -78 °C . After the mixture was stirred for 1h at the same temperature, an aldehyde or ketone (1 equiv in 4 mL THF) was added and the reaction mixture was stirred for additional 3h in room temperature. After completion of the reaction analyzed by TLC, the solvent was removed in vacuo. The reaction mixture was diluted with EtOAc, and the combined organic layers were washed with brine. After the organic layer was dried with anhydrous Na<sub>2</sub>SO<sub>4</sub>, the solvent was removed under reduced pressure. The residue was purified by silica gel chromatography or by crystallization with hexane and EtOAc to give propargylic alcohol.

## NMR Characterization Data

|                                                                                     |                                                                                                                                                                                                                                                                                                                                                                                                                                                                                                                                                                                                                                                                                                                                                                                                                                                                       |
|-------------------------------------------------------------------------------------|-----------------------------------------------------------------------------------------------------------------------------------------------------------------------------------------------------------------------------------------------------------------------------------------------------------------------------------------------------------------------------------------------------------------------------------------------------------------------------------------------------------------------------------------------------------------------------------------------------------------------------------------------------------------------------------------------------------------------------------------------------------------------------------------------------------------------------------------------------------------------|
| 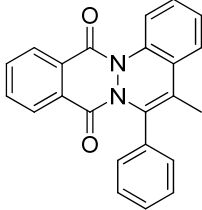   | <p><b>5-methyl-6-phenylphthalazino[2,3-a]cinnoline-8,13-dione 3aa</b></p> <p>Yellow solid, Yield; 61.5 mg, 83%</p> <p><b><sup>1</sup>H NMR</b> (400 MHz, CDCl<sub>3</sub>): δ 8.50 (d, <i>J</i> = 8 Hz, 1H), 8.15 (d, <i>J</i> = 7.2 Hz, 1H), 8.04 (d, <i>J</i> = 8 Hz, 1H), 7.91 (t, <i>J</i> = 8 Hz, 1H), 7.83 (t, <i>J</i> = 8 Hz, 1H), 7.47 (d, <i>J</i> = 8 Hz, 1H), 7.37-7.25 (m, 6H), 2.15 (s, 3H).</p> <p><b><sup>13</sup>C NMR</b> (100 MHz, CDCl<sub>3</sub>): δ 157.85, 156.24, 136.30, 135.03, 133.98, 133.68, 129.74, 129.47, 128.92, 128.42, 128.27, 128.19, 127.85, 127.67, 126.24, 124.36, 121.05, 118.13, 14.55.</p> <p><b>HRMS</b> [M + H]<sup>+</sup> calculated for C<sub>23</sub>H<sub>16</sub>N<sub>2</sub>O<sub>2</sub>: 353.1290, found: 353.1285</p>                                                                                         |
|  | <p><b>6-(4-(tert-butyl)phenyl)-5-methylphthalazino[2,3-a]cinnoline-8,13-dione 3ab</b></p> <p>Yellow solid, Yield; 68.7 mg, 80%</p> <p><b><sup>1</sup>H NMR</b> (400 MHz, CDCl<sub>3</sub>): δ 8.39 (d, <i>J</i> = 8 Hz, 1H), 8.06 (d, <i>J</i> = 8 Hz, 1H), 7.93 (d, <i>J</i> = 8 Hz, 1H), 7.79 (t, <i>J</i> = 8 Hz, 1H), 7.74 (t, <i>J</i> = 8 Hz, 1H), 7.35 (d, <i>J</i> = 8 Hz, 1H), 7.27-7.05 (m, 6H), 2.05 (s, 3H), 1.24 (s, 12H).</p> <p><b><sup>13</sup>C NMR</b> (100 MHz, CDCl<sub>3</sub>): δ 157.92, 156.27, 136.37, 135.08, 133.97, 133.60, 130.86, 129.81, 129.50, 128.54, 128.41, 128.12, 127.86, 127.81, 126.18, 125.08, 124.39, 120.93, 117.96, 34.69, 31.28, 14.68.</p> <p><b>HRMS</b> [M + H]<sup>+</sup> calculated for C<sub>27</sub>H<sub>24</sub>N<sub>2</sub>O<sub>2</sub>: 409.1916, found: 409.1911</p>                                      |
|  | <p><b>6-(4-methoxyphenyl)-5-methylphthalazino[2,3-a]cinnoline-8,13-dione 3ac</b></p> <p>Yellow solid, Yield; 62.7 mg, 78%</p> <p><b><sup>1</sup>H NMR</b> (400 MHz, CDCl<sub>3</sub>): δ 8.39 (d, <i>J</i> = 8 Hz, 1H), 8.07 (d, <i>J</i> = 8 Hz, 1H), 7.92 (d, <i>J</i> = 8 Hz, 1H), 7.81-7.77 (t, <i>J</i> = 8 Hz, 1H), 7.74-7.70 (t, <i>J</i> = 8 Hz, 1H), 7.35-7.21 (m, 3H), 7.08 (d, <i>J</i> = 8 Hz, 2H), 6.80 (d, <i>J</i> = 8 Hz, 2H), 3.73 (s, 3H), 2.04 (s, 3H).</p> <p><b><sup>13</sup>C NMR</b> (100 MHz, CDCl<sub>3</sub>): δ 159.28, 157.90, 156.32, 136.30, 134.91, 133.96, 133.63, 130.19, 129.77, 129.47, 128.39, 128.06, 127.86, 127.81, 126.22, 126.11, 124.30, 120.52, 118.09, 113.68, 55.16, 14.57.</p> <p><b>HRMS</b> [M + Na]<sup>+</sup> calculated for C<sub>24</sub>H<sub>18</sub>N<sub>2</sub>O<sub>3</sub>: 405.1215, found: 405.1210</p> |

|                                                                                     |                                                                                                                                                                                                                                                                                                                                                                                                                                                                                                                                                                                                                                                                                                                                                                                                                                                                                                                                                                                                                                           |
|-------------------------------------------------------------------------------------|-------------------------------------------------------------------------------------------------------------------------------------------------------------------------------------------------------------------------------------------------------------------------------------------------------------------------------------------------------------------------------------------------------------------------------------------------------------------------------------------------------------------------------------------------------------------------------------------------------------------------------------------------------------------------------------------------------------------------------------------------------------------------------------------------------------------------------------------------------------------------------------------------------------------------------------------------------------------------------------------------------------------------------------------|
| 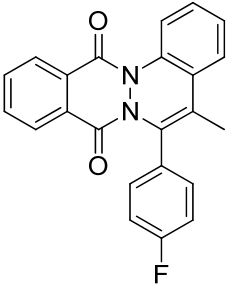   | <p><b>6-(4-fluorophenyl)-5-methylphthalazino[2,3-a]cinnoline-8,13-dione 3ad</b></p> <p>Yellow solid, Yield; 67.7 mg, 87%</p> <p><b><sup>1</sup>H NMR</b> (400 MHz, CDCl<sub>3</sub>): δ 8.39 (d, <i>J</i> = 8 Hz, 1H), 8.05 (d, <i>J</i> = 8 Hz, 1H), 7.93 (d, <i>J</i> = 8 Hz, 1H), 7.81 (t, <i>J</i> = 8 Hz, 1H), 7.74 (t, <i>J</i> = 8 Hz, 1H), 7.35 (d, <i>J</i> = 8 Hz, 1H), 7.27-7.12 (m, 4H), 6.98 (t, <i>J</i> = 8 Hz, 2H), 2.02 (s, 3H).</p> <p><b><sup>13</sup>C NMR</b> (100 MHz, CDCl<sub>3</sub>): δ 162.0 (d, <i>J</i> = 247.0 Hz, C-F coupling), 157.84, 156.23, 136.30, 134.04 (d, <i>J</i> = 7 Hz, C-F coupling), 133.80, 133.74 (d, <i>J</i> = 8 Hz, C-F coupling), 129.93 (d, <i>J</i> = 4Hz, C-F coupling), 129.60, 129.44, 128.44 (d, <i>J</i> = 6Hz, C-F coupling), 127.80, 127.45, 126.30, 124.38, 121.35, 118.14, 115.44 (d, <i>J</i> = 13 Hz, C-F coupling), 14.53.</p> <p><b>HRMS</b> [M + H]<sup>+</sup> calculated for C<sub>23</sub>H<sub>15</sub>FN<sub>2</sub>O<sub>2</sub>: 371.1196, found: 371.1201</p> |
|   | <p><b>5-methyl-6-(4-nitrophenyl)phthalazino[2,3-a]cinnoline-8,13-dione 3ae</b></p> <p>Yellow solid, Yield; 76.9 mg, 92%</p> <p><b><sup>1</sup>H NMR</b> (400 MHz, CDCl<sub>3</sub>) δ 8.41 (d, <i>J</i> = 8 Hz, 1H), 8.32 (d, <i>J</i> = 8 Hz, 1H), 8.06 (d, <i>J</i> = 8 Hz, 1H), 7.92-7.84 (m, 2H), 7.80 (t, <i>J</i> = 8 Hz, 1H), 7.36-7.30 (m, 2H), 7.24-7.18 (m, 2H), 7.00 (d, <i>J</i> = 4Hz, 1H), 4.82 (s, 2H), 2.03 (s, 3H).</p> <p><b><sup>13</sup>C NMR</b> (100 MHz, CDCl<sub>3</sub>): δ 157.75, 156.22, 147.19, 140.81, 136.36, 134.33, 134.14, 132.54, 129.73, 129.43, 129.21, 129.17, 128.66, 127.87, 126.74, 126.41, 124.64, 123.65, 123.30, 118.11, 14.63.</p> <p><b>HRMS</b> [M + H]<sup>+</sup> calculated for C<sub>23</sub>H<sub>15</sub>N<sub>3</sub>O<sub>4</sub>: 398.1141, found: 398.1129</p>                                                                                                                                                                                                                   |
|  | <p><b>6-(3-fluorophenyl)-5-methylphthalazino[2,3-a]cinnoline-8,13-dione 3af</b></p> <p>Yellow solid, Yield; 66.2 mg, 85%</p> <p><b><sup>1</sup>H NMR</b> (400 MHz, CDCl<sub>3</sub>): δ 8.40 (d, <i>J</i> = 8 Hz, 1H), 8.06 (d, <i>J</i> = 8 Hz, 1H), 7.94 (d, <i>J</i> = 8 Hz, 1H), 7.83-7.79 (t, <i>J</i> = 8 Hz, 1H), 7.75-7.71 (t, <i>J</i> = 8 Hz, 1H), 7.37-7.20 (m, 4H), 6.97-6.87 (m, 3H), 2.05 (s, 3H).</p> <p><b><sup>13</sup>C NMR</b> (100 MHz, CDCl<sub>3</sub>): δ 162.48(d, <i>J</i> = 245 Hz, C-F coupling), 157.83, 156.23, 136.35, 136.17 (d, <i>J</i> = 8 Hz, C-F coupling), 134.12, 133.85, 133.60, 129.73 (d, <i>J</i> = 9 Hz, C-F coupling), 129.49 (d, <i>J</i> = 9 Hz, C-F coupling), 128.59, 128.51, 127.85, 127.29, 126.29, 124.69, 124.48, 121.83, 118.09, 116.05(d, <i>J</i> = 22 Hz, C-F coupling), 115.32(d, <i>J</i> = 21 Hz, C-F coupling), 14.57.</p> <p><b>HRMS</b> [M + H]<sup>+</sup> calculated for C<sub>23</sub>H<sub>15</sub>FN<sub>2</sub>O<sub>2</sub>: 371.1196, found: 371.1211</p>           |



|                                                                                     |                                                                                                                                                                                                                                                                                                                                                                                                                                                                                                                                                                                                                                                                                                                                                                                                                                                                                                                                                                                                 |
|-------------------------------------------------------------------------------------|-------------------------------------------------------------------------------------------------------------------------------------------------------------------------------------------------------------------------------------------------------------------------------------------------------------------------------------------------------------------------------------------------------------------------------------------------------------------------------------------------------------------------------------------------------------------------------------------------------------------------------------------------------------------------------------------------------------------------------------------------------------------------------------------------------------------------------------------------------------------------------------------------------------------------------------------------------------------------------------------------|
| 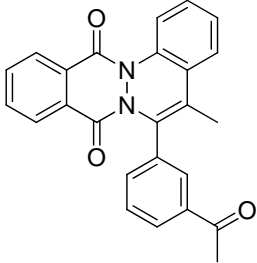   | <p><b>6-(3-acetylphenyl)-5-methylphthalazino[2,3-a]cinnoline-8,13-dione 3ag</b></p> <p>Yellow solid, Yield; 63.8 mg, 77%</p> <p><b><sup>1</sup>H NMR</b> (400 MHz, CDCl<sub>3</sub>): δ 8.40 (d, <i>J</i> = 8 Hz, 1H), 8.02 (d, <i>J</i> = 8 Hz, 1H), 7.95(d, <i>J</i> = 8 Hz, 1H), 7.84-7.77 (m, 3H), 7.73-7.69 (t, <i>J</i> = 8 Hz, 1H), 7.40-7.21 (m, 5H), 2.47 (s, 3H), 2.04 (s, 3H).</p> <p><b><sup>13</sup>C NMR</b> (100 MHz, CDCl<sub>3</sub>): δ 197.46, 157.83, 156.21, 137.07, 136.34, 134.65, 134.08, 134.00, 133.87, 133.38, 129.49, 128.72, 128.61, 128.55, 128.51, 128.22, 127.76, 127.26, 126.31, 124.42, 121.88, 118.17, 26.59, 14.53.</p> <p><b>HRMS</b> [M + H]<sup>+</sup> calculated for C<sub>25</sub>H<sub>18</sub>N<sub>2</sub>O<sub>3</sub>: 395.1396, found: 395.1401</p>                                                                                                                                                                                             |
|   | <p><b>6-(2,3-difluorophenyl)-5-methylphthalazino[2,3-a]cinnoline-8,13-dione 3ah</b></p> <p>Yellow solid, Yield; 61.2 mg, 75%</p> <p><b><sup>1</sup>H NMR</b> (400 MHz, CDCl<sub>3</sub>): δ 8.38 (d, <i>J</i> = 8 Hz, 1H), 8.06 (d, <i>J</i> = 8 Hz, 1H), 7.94 (d, <i>J</i> = 8 Hz, 1H), 7.81 (t, <i>J</i> = 8 Hz, 1H), 7.74 (t, <i>J</i> = 8 Hz, 1H), 7.38 (d, <i>J</i> = 8 Hz, 1H), 7.30 (t, <i>J</i> = 8 Hz, 1H), 7.23(t, <i>J</i> = 8 Hz, 1H), 7.08-6.95 (m, 3H), 2.02 (s, 3H).</p> <p><b><sup>13</sup>C NMR</b> (100 MHz, CDCl<sub>3</sub>): δ 157.70, 155.73, 151.76 (d, <i>J</i> = 12 Hz, C-F coupling), 149.28 (d, <i>J</i> = 12 Hz, C-F coupling), 136.36, 134.01, 133.84, 129.54, 129.07, 128.88, 128.43, 127.81, 126.98, 126.29, 125.92, 124.44, 123.82, 123.77, 118.53, 117.46 (d, <i>J</i> = 18 Hz, C-F coupling), 14.49.</p> <p><b>HRMS</b> [M + H]<sup>+</sup> calculated for C<sub>23</sub>H<sub>14</sub>F<sub>2</sub>N<sub>2</sub>O<sub>2</sub>: 389.1102, found: 389.1081</p> |
|  | <p><b>6-(5-chloro-2-methylphenyl)-5-methylphthalazino[2,3-a]cinnoline-8,13-dione 3ai</b></p> <p>Yellow solid, Yield; 61.4 mg, 73%</p> <p><b><sup>1</sup>H NMR</b> (400 MHz, CDCl<sub>3</sub>): δ 8.37 (d, <i>J</i> = 8 Hz, 1H), 8.05 (d, <i>J</i> = 8 Hz, 1H), 7.97-7.94 (m, 1H), 7.92 (s, 1H), 7.84-7.83 (m, 1H), 7.81 (t, <i>J</i> = 8 Hz, 1H), 7.73 (t, <i>J</i> = 8 Hz, 1H), 7.36 (d, <i>J</i> = 8 Hz, 1H), 7.29-7.21 (m, 2H), 7.13 (br, 1H), 7.05 (d, <i>J</i> = 8 Hz, 1H), 2.09 (s, 3H), 1.88 (s, 3H).</p> <p><b><sup>13</sup>C NMR</b> (100 MHz, CDCl<sub>3</sub>): δ 157.93, 155.45, 136.10, 136.01, 134.07, 133.81, 131.37, 131.16, 129.05, 128.62, 128.49, 128.39, 127.86, 127.10, 126.35, 125.71, 124.07, 118.66, 19.36, 14.03.</p> <p><b>HRMS</b> [M + H]<sup>+</sup> calculated for C<sub>24</sub>H<sub>17</sub>ClN<sub>2</sub>O<sub>2</sub>: 401.1057, found: 401.1030</p>                                                                                                        |

|                                                                                     |                                                                                                                                                                                                                                                                                                                                                                                                                                                                                                                                                                                                                                                                                                                                                                                                                                                                |
|-------------------------------------------------------------------------------------|----------------------------------------------------------------------------------------------------------------------------------------------------------------------------------------------------------------------------------------------------------------------------------------------------------------------------------------------------------------------------------------------------------------------------------------------------------------------------------------------------------------------------------------------------------------------------------------------------------------------------------------------------------------------------------------------------------------------------------------------------------------------------------------------------------------------------------------------------------------|
| 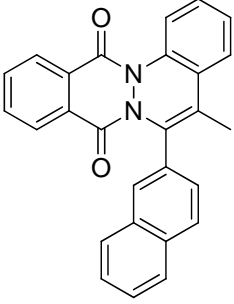   | <p><b>5-methyl-6-(naphthalen-2-yl)phthalazino[2,3-a]cinnoline-8,13-dione 3aj</b></p> <p>Yellow solid, Yield; 64.3 mg, 76%</p> <p><b><sup>1</sup>H NMR</b> (400 MHz, CDCl<sub>3</sub>): δ 8.50 (d, <i>J</i> = 8 Hz, 1H), 8.09-8.03 (m, 2H), 7.93-7.97 (m, 2H), 7.82-7.76 (m, 4H), 7.47-7.29 (m, 6H), 2.17 (s, 3H).</p> <p><b><sup>13</sup>C NMR</b> (100 MHz, CDCl<sub>3</sub>): δ 157.91, 156.29, 136.34, 136.03, 134.95, 134.05, 133.75, 132.93, 131.40, 129.65, 129.50, 128.47, 128.36, 128.22, 127.93, 127.86, 127.83, 127.65, 126.51, 126.36, 126.29, 125.73, 124.44, 121.59, 118.12, 14.68.</p> <p><b>HRMS</b> [M + H]<sup>+</sup> calculated for C<sub>27</sub>H<sub>18</sub>N<sub>2</sub>O<sub>2</sub>: 403.1447, found: 403.1441</p>                                                                                                                   |
|  | <p><b>6-([1,1'-biphenyl]-3-yl)-5-methylphthalazino[2,3-a]cinnoline-8,13-dione 3ak</b></p> <p>Yellow solid, Yield; 70.2 mg, 78%</p> <p><b><sup>1</sup>H NMR</b> (400 MHz, CDCl<sub>3</sub>): δ 8.40 (d, <i>J</i> = 8 Hz, 1H), 8.07 (d, <i>J</i> = 8 Hz, 1H), 7.95 (d, <i>J</i> = 8 Hz, 1H), 7.81-7.78 (t, <i>J</i> = 8 Hz, 1H), 7.74-7.70 (t, <i>J</i> = 8 Hz, 1H), 7.45-7.23 (m, 11H), 7.13 (d, <i>J</i> = 8 Hz, 1H), 2.01 (s, 3H).</p> <p><b><sup>13</sup>C NMR</b> (100 MHz, CDCl<sub>3</sub>): δ 157.89, 156.33, 141.17, 140.67, 136.36, 134.96, 134.49, 134.02, 133.73, 129.72, 129.49, 128.72, 128.60, 128.48, 128.34, 127.85, 127.74, 127.63, 127.42, 127.22, 127.13, 126.26, 124.41, 121.33, 118.12, 14.69.</p> <p><b>HRMS</b> [M + H]<sup>+</sup> calculated for C<sub>29</sub>H<sub>20</sub>N<sub>2</sub>O<sub>2</sub>: 429.1603, found: 429.1583</p> |
|  | <p><b>6-(2-methoxy-4-nitrophenyl)-5-methylphthalazino[2,3-a]cinnoline-8,13-dione 3al</b></p> <p>Yellow solid, Yield; 62.9 mg, 70%</p> <p><b><sup>1</sup>H NMR</b> (400 MHz, CDCl<sub>3</sub>): δ 8.41 (d, <i>J</i> = 8 Hz, 1H), 8.05 (d, <i>J</i> = 8 Hz, 1H), 7.94 (d, <i>J</i> = 8 Hz, 1H), 7.88 (d, <i>J</i> = 8 Hz, 1H), 7.83-7.79 (t, <i>J</i> = 8 Hz, 1H), 7.74-7.71 (t, <i>J</i> = 8 Hz, 1H), 7.54 (s, 1H), 7.48 (d, <i>J</i> = 8 Hz, 1H), 7.40 (d, <i>J</i> = 8 Hz, 1H), 7.32-7.28 (t, <i>J</i> = 8 Hz, 1H), 7.25-7.21 (t, <i>J</i> = 8 Hz, 1H), 3.23 (s, 3H), 2.05 (s, 3H).</p> <p><b><sup>13</sup>C NMR</b> (100 MHz, CDCl<sub>3</sub>): δ 157.43, 156.01, 155.87, 148.54, 136.10, 133.83, 133.77, 132.43, 131.08, 129.63, 129.24, 128.84, 128.46, 128.09,</p>                                                                                       |

|  |                                                                                                                                                                                                                                      |
|--|--------------------------------------------------------------------------------------------------------------------------------------------------------------------------------------------------------------------------------------|
|  | <p>127.65, 127.48, 126.36, 125.69, 124.44, 123.30, 119.20, 115.74, 105.43, 55.41, 14.79.</p> <p><b>HRMS</b> [M + H]<sup>+</sup> calculated for C<sub>24</sub>H<sub>17</sub>N<sub>3</sub>O<sub>5</sub>: 428.1246, found: 428.1219</p> |
|--|--------------------------------------------------------------------------------------------------------------------------------------------------------------------------------------------------------------------------------------|

|                                                                                   |                                                                                                                                                                                                                                                                                                                                                                                                                                                                                                                                                                                                                                                                                                                       |
|-----------------------------------------------------------------------------------|-----------------------------------------------------------------------------------------------------------------------------------------------------------------------------------------------------------------------------------------------------------------------------------------------------------------------------------------------------------------------------------------------------------------------------------------------------------------------------------------------------------------------------------------------------------------------------------------------------------------------------------------------------------------------------------------------------------------------|
| 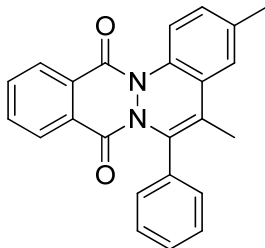 | <p><b>3,5-dimethyl-6-phenylphthalazino[2,3-a]cinnoline-8,13-dione 3ba</b></p> <p>Yellow solid, Yield; 65.5 mg, 85%</p> <p><b><sup>1</sup>H NMR</b> (400 MHz, CDCl<sub>3</sub>): δ 8.38 (d, <i>J</i> = 8 Hz, 1H), 8.05 (d, <i>J</i> = 8 Hz, 1H), 7.84-7.69 (m, 3H), 7.28-7.23 (m, 3H), 7.15-7.14 (m, 3H), 7.07 (d, <i>J</i> = 8 Hz, 1H), 2.32 (s, 3H), 2.04 (s, 3H).</p> <p><b><sup>13</sup>C NMR</b> (100 MHz, CDCl<sub>3</sub>): δ 156.51, 155.11, 136.48, 136.09, 134.92, 134.54, 133.62, 133.26, 128.94, 128.36, 128.23, 126.67, 124.66, 121.01, 117.39, 21.19, 14.50.</p> <p><b>HRMS</b> [M + H]<sup>+</sup> calculated for C<sub>24</sub>H<sub>18</sub>N<sub>2</sub>O<sub>2</sub>: 367.1447, found: 367.1473</p> |
|-----------------------------------------------------------------------------------|-----------------------------------------------------------------------------------------------------------------------------------------------------------------------------------------------------------------------------------------------------------------------------------------------------------------------------------------------------------------------------------------------------------------------------------------------------------------------------------------------------------------------------------------------------------------------------------------------------------------------------------------------------------------------------------------------------------------------|

|                                                                                     |                                                                                                                                                                                                                                                                                                                                                                                                                                                                                                                                                                                                                                                                                                                                                                                                                                                                                |
|-------------------------------------------------------------------------------------|--------------------------------------------------------------------------------------------------------------------------------------------------------------------------------------------------------------------------------------------------------------------------------------------------------------------------------------------------------------------------------------------------------------------------------------------------------------------------------------------------------------------------------------------------------------------------------------------------------------------------------------------------------------------------------------------------------------------------------------------------------------------------------------------------------------------------------------------------------------------------------|
| 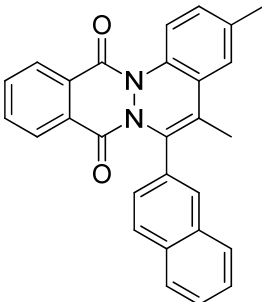 | <p><b>3,5-dimethyl-6-(naphthalen-2-yl)phthalazino[2,3-a]cinnoline-8,13-dione 3bj</b></p> <p>Yellow solid, Yield; 70.05 mg, 80%</p> <p><b><sup>1</sup>H NMR</b> (400 MHz, CDCl<sub>3</sub>): δ 8.41 (d, <i>J</i> = 8 Hz, 1H), 8.00 (d, <i>J</i> = 8 Hz, 1H), 7.87 (d, <i>J</i> = 8 Hz, 1H), 7.82-7.78 (t, <i>J</i> = 8 Hz, 1H), 7.75-7.67 (m, 5H), 7.40-7.38 (t, <i>J</i> = 4 Hz, 2H), 7.20-7.19 (m, 2H), 7.09 (d, <i>J</i> = 8 Hz, 1H), 2.34 (s, 3H), 2.07 (s, 3H).</p> <p><b><sup>13</sup>C NMR</b> (100 MHz, CDCl<sub>3</sub>): δ 157.71, 156.30, 136.04, 134.81, 133.89, 133.68, 132.93, 132.91, 131.53, 129.62, 129.56, 128.95, 128.38, 128.21, 127.88, 127.82, 127.43, 126.46, 126.32, 124.81, 121.58, 117.99, 21.23, 14.68.</p> <p><b>HRMS</b> [M + Na]<sup>+</sup> calculated for C<sub>28</sub>H<sub>20</sub>N<sub>2</sub>O<sub>2</sub>: 439.1422, found: 417.1417</p> |
|-------------------------------------------------------------------------------------|--------------------------------------------------------------------------------------------------------------------------------------------------------------------------------------------------------------------------------------------------------------------------------------------------------------------------------------------------------------------------------------------------------------------------------------------------------------------------------------------------------------------------------------------------------------------------------------------------------------------------------------------------------------------------------------------------------------------------------------------------------------------------------------------------------------------------------------------------------------------------------|

|                                                                                   |                                                                                                                                                                                                                                                                                                                                                                                                                                                                                                                                                                                                                                                                                                                                                                                                                                                                                                                                                                  |
|-----------------------------------------------------------------------------------|------------------------------------------------------------------------------------------------------------------------------------------------------------------------------------------------------------------------------------------------------------------------------------------------------------------------------------------------------------------------------------------------------------------------------------------------------------------------------------------------------------------------------------------------------------------------------------------------------------------------------------------------------------------------------------------------------------------------------------------------------------------------------------------------------------------------------------------------------------------------------------------------------------------------------------------------------------------|
| 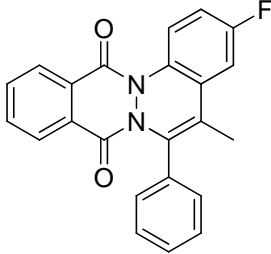 | <p><b>3-fluoro-5-methyl-6-phenylphthalazino[2,3-a]cinnoline-8,13-dione 3ca</b></p> <p>Yellow solid, Yield; 63.8 mg, 82%</p> <p><b><sup>1</sup>H NMR</b> (400 MHz, CDCl<sub>3</sub>): δ 8.38 (d, <i>J</i> = 8 Hz, 1H), 8.04 (d, <i>J</i> = 8 Hz, 1H), 7.93-7.90 (m, 1H), 7.82 (t, <i>J</i> = 8 Hz, 1H), 7.73 (t, <i>J</i> = 8 Hz, 1H), 7.26 (br, 3H), 7.15 (d, <i>J</i> = 8 Hz, 1H), 7.04 (d, <i>J</i> = 8 Hz, 1H), 7.96 (t, <i>J</i> = 8 Hz, 1H), 2.01 (s, 3H).</p> <p><b><sup>13</sup>C NMR</b> (100 MHz, CDCl<sub>3</sub>): δ 160.44 (d, <i>J</i> = 244 Hz, C-F coupling), 157.69, 156.33, 136.25, 134.07, 133.87, 133.58, 132.10, 132.07, 130.03, 129.95, 129.63, 129.32, 128.86, 128.53, 128.44, 128.29, 127.90, 120.22, 120.01 and 119.99 (F coupling), 114.90, 114.67, 111.12 and 110.88 (F coupling), 14.51.</p> <p><b>HRMS</b> [M + H]<sup>+</sup> calculated for C<sub>23</sub>H<sub>15</sub>FN<sub>2</sub>O<sub>2</sub>: 371.1196, found: 371.1121</p> |
|-----------------------------------------------------------------------------------|------------------------------------------------------------------------------------------------------------------------------------------------------------------------------------------------------------------------------------------------------------------------------------------------------------------------------------------------------------------------------------------------------------------------------------------------------------------------------------------------------------------------------------------------------------------------------------------------------------------------------------------------------------------------------------------------------------------------------------------------------------------------------------------------------------------------------------------------------------------------------------------------------------------------------------------------------------------|

|                                                                                     |                                                                                                                                                                                                                                                                                                                                                                                                                                                                                                                                                                                                                                                                                                                                                                                                                                                                                                                                                                                                          |
|-------------------------------------------------------------------------------------|----------------------------------------------------------------------------------------------------------------------------------------------------------------------------------------------------------------------------------------------------------------------------------------------------------------------------------------------------------------------------------------------------------------------------------------------------------------------------------------------------------------------------------------------------------------------------------------------------------------------------------------------------------------------------------------------------------------------------------------------------------------------------------------------------------------------------------------------------------------------------------------------------------------------------------------------------------------------------------------------------------|
| 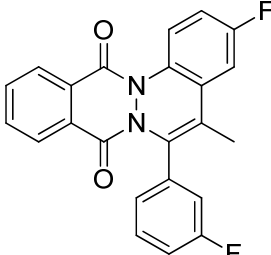 | <p><b>3-fluoro-6-(3-fluorophenyl)-5-methylphthalazino[2,3-a]cinnoline-8,13-dione 3cf</b></p> <p>Yellow solid, Yield; 69.4 mg, 85%</p> <p><b><sup>1</sup>H NMR</b> (400 MHz, CDCl<sub>3</sub>): δ 8.38 (d, <i>J</i> = 8 Hz, 1H), 8.05 (d, <i>J</i> = 8 Hz, 1H), 7.94 (dd, <i>J</i> = 8 Hz, 1H), 7.83-7.79 (t, <i>J</i> = 8 Hz, 1H), 7.76-7.72 (t, <i>J</i> = 8 Hz, 1H), 7.27-6.85 (m, 6H), 2.02 (s, 3H).</p> <p><b><sup>13</sup>C NMR</b> (100 MHz, CDCl<sub>3</sub>): δ 162.69 (d, <i>J</i> = 208 Hz, C-F coupling), 160.2 (d, <i>J</i> = 207 Hz, C-F coupling), 157.66, 156.28, 135.74, 134.88, 134.17, 134.00, 132.20, 132.17, 129.87, 129.79, 129.65, 129.56, 129.46, 129.33, 128.52, 127.89, 124.67, 120.72, 120.70, 120.21, 120.13, 116.12 and 115.91 (F coupling), 115.68, 115.47, 115.21, 114.98, 111.22 and 110.98 (F coupling), 14.50.</p> <p><b>HRMS</b> [M + H]<sup>+</sup> calculated for C<sub>23</sub>H<sub>14</sub>F<sub>2</sub>N<sub>2</sub>O<sub>2</sub>: 389.1102, found: 389.1128</p> |
|-------------------------------------------------------------------------------------|----------------------------------------------------------------------------------------------------------------------------------------------------------------------------------------------------------------------------------------------------------------------------------------------------------------------------------------------------------------------------------------------------------------------------------------------------------------------------------------------------------------------------------------------------------------------------------------------------------------------------------------------------------------------------------------------------------------------------------------------------------------------------------------------------------------------------------------------------------------------------------------------------------------------------------------------------------------------------------------------------------|

|                                                                                     |                                                                                                                                                                                                                                                                                                                                                                                                                                                                                                                                                                                  |
|-------------------------------------------------------------------------------------|----------------------------------------------------------------------------------------------------------------------------------------------------------------------------------------------------------------------------------------------------------------------------------------------------------------------------------------------------------------------------------------------------------------------------------------------------------------------------------------------------------------------------------------------------------------------------------|
| 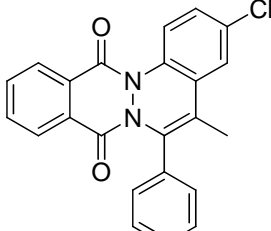 | <p><b>3-chloro-5-methyl-6-phenylphthalazino[2,3-a]cinnoline-8,13-dione 3da</b></p> <p>Yellow solid, Yield; 65.0 mg, 80%</p> <p><b><sup>1</sup>H NMR</b> (400 MHz, CDCl<sub>3</sub>): δ 8.38 (d, <i>J</i> = 8 Hz, 1H), 8.05 (d, <i>J</i> = 8 Hz, 1H), 7.89 (d, <i>J</i> = 8 Hz, 2H), 7.82-7.78 (t, <i>J</i> = 8 Hz, 1H), 7.74-7.70 (t, <i>J</i> = 8 Hz, 1H), 7.30-7.13 (m, 7H), 2.02 (s, 3H).</p> <p><b><sup>13</sup>C NMR</b> (100 MHz, CDCl<sub>3</sub>): δ 157.79, 156.24, 136.22, 134.69, 134.16, 133.86, 133.60, 131.67, 129.65, 129.48, 129.25, 128.85, 128.53, 128.46,</p> |
|-------------------------------------------------------------------------------------|----------------------------------------------------------------------------------------------------------------------------------------------------------------------------------------------------------------------------------------------------------------------------------------------------------------------------------------------------------------------------------------------------------------------------------------------------------------------------------------------------------------------------------------------------------------------------------|

|  |                                                                                                                                                                                                       |
|--|-------------------------------------------------------------------------------------------------------------------------------------------------------------------------------------------------------|
|  | 128.28, 127.98, 127.93, 124.23, 119.92, 119.62, 14.48.<br><b>HRMS</b> [M + H] <sup>+</sup> calculated for C <sub>23</sub> H <sub>15</sub> ClN <sub>2</sub> O <sub>2</sub> : 387.0900, found: 387.0929 |
|--|-------------------------------------------------------------------------------------------------------------------------------------------------------------------------------------------------------|

|  |                                                                                                                                                                                                                                                                                                                                                                                                                                                                                                                                                                                                                                                                                                                                                                                                                                                                                                                         |
|--|-------------------------------------------------------------------------------------------------------------------------------------------------------------------------------------------------------------------------------------------------------------------------------------------------------------------------------------------------------------------------------------------------------------------------------------------------------------------------------------------------------------------------------------------------------------------------------------------------------------------------------------------------------------------------------------------------------------------------------------------------------------------------------------------------------------------------------------------------------------------------------------------------------------------------|
|  | <p><b>3-chloro-5-methyl-6-(naphthalen-2-yl)phthalazino[2,3-a]cinnoline-8,13-dione 3dj</b></p> <p>Yellow solid, Yield; 67.0 mg, 73%</p> <p><b><sup>1</sup>H NMR</b> (400 MHz, CDCl<sub>3</sub>): δ 8.41 (d, <i>J</i> = 8 Hz, 1H), 8.00 (d, <i>J</i> = 8 Hz, 1H), 7.97-7.95 (m, 2H), 7.92 (d, <i>J</i> = 8 Hz, 1H), 7.85-7.83 (m, 2H), 7.82 (d, <i>J</i> = 8 Hz, 1H), 7.72-7.70 (m, 2H), 7.76 (s, 1H), 7.41 (t, <i>J</i> = 4 Hz, 1H), 7.33 (s, 1H), 7.23-7.20 (m, 1H), 2.06 (s, 3H).</p> <p><b><sup>13</sup>C NMR</b> (100 MHz, CDCl<sub>3</sub>): δ 162.78, 157.85, 156.29, 136.03, 134.74, 134.21, 133.92, 133.02, 132.89, 131.70, 131.36, 131.01, 129.47, 129.29, 128.51, 128.23, 128.05, 127.93, 127.85, 126.67, 126.46, 126.08, 125.72, 124.29, 120.42, 119.62, 14.60.</p> <p><b>HRMS</b> [M + H]<sup>+</sup> calculated for C<sub>27</sub>H<sub>17</sub>ClN<sub>2</sub>O<sub>2</sub>: 437.1057, found: 437.1051</p> |
|--|-------------------------------------------------------------------------------------------------------------------------------------------------------------------------------------------------------------------------------------------------------------------------------------------------------------------------------------------------------------------------------------------------------------------------------------------------------------------------------------------------------------------------------------------------------------------------------------------------------------------------------------------------------------------------------------------------------------------------------------------------------------------------------------------------------------------------------------------------------------------------------------------------------------------------|

|  |                                                                                                                                                                                                                                                                                                                                                                                                                                                                                                                                                                                                                                                                                                                                                                                             |
|--|---------------------------------------------------------------------------------------------------------------------------------------------------------------------------------------------------------------------------------------------------------------------------------------------------------------------------------------------------------------------------------------------------------------------------------------------------------------------------------------------------------------------------------------------------------------------------------------------------------------------------------------------------------------------------------------------------------------------------------------------------------------------------------------------|
|  | <p><b>3-bromo-5-methyl-6-phenylphthalazino[2,3-a]cinnoline-8,13-dione 3ea</b></p> <p>Yellow solid, Yield; 75.1 mg, 83%</p> <p><b><sup>1</sup>H NMR</b> (400 MHz, CDCl<sub>3</sub>): δ 8.37 (d, <i>J</i> = 8 Hz, 1H), 8.05 (d, <i>J</i> = 8 Hz, 1H), 7.82-7.78 (m, 2H), 7.74 (t, <i>J</i> = 8 Hz, 1H), 7.45 (s, 1H), 7.35 (d, <i>J</i> = 8 Hz, 1H), 7.27-7.26 (m, 3H), 7.14-7.13 (m, 2H), 2.01 (s, 3H).</p> <p><b><sup>13</sup>C NMR</b> (100 MHz, CDCl<sub>3</sub>): δ 157.78, 156.21, 136.26, 135.25, 134.16, 133.85, 133.60, 130.91, 129.78, 129.66, 129.26, 128.86, 128.52, 128.47, 128.27, 127.93, 127.17, 119.85, 119.81, 119.43, 14.48.</p> <p><b>HRMS</b> [M + H]<sup>+</sup> calculated for C<sub>23</sub>H<sub>15</sub>BrN<sub>2</sub>O<sub>2</sub>: 431.0395, found: 431.0390</p> |
|--|---------------------------------------------------------------------------------------------------------------------------------------------------------------------------------------------------------------------------------------------------------------------------------------------------------------------------------------------------------------------------------------------------------------------------------------------------------------------------------------------------------------------------------------------------------------------------------------------------------------------------------------------------------------------------------------------------------------------------------------------------------------------------------------------|

|  |                                                                                                                                                                                                                                                                                                                                                                                                                                                                                                                                      |
|--|--------------------------------------------------------------------------------------------------------------------------------------------------------------------------------------------------------------------------------------------------------------------------------------------------------------------------------------------------------------------------------------------------------------------------------------------------------------------------------------------------------------------------------------|
|  | <p><b>5-methyl-6-phenyl-3-(trifluoromethyl)phthalazino[2,3-a]cinnoline-8,13-dione 3fa</b></p> <p>Yellow solid, Yield; 65.4 mg, 74%</p> <p><b><sup>1</sup>H NMR</b> (400 MHz, CDCl<sub>3</sub>): δ 8.39 (d, <i>J</i> = 8 Hz, 1H), 8.06-8.02 (t, <i>J</i> = 8 Hz, 2H), 7.82 (d, <i>J</i> = 8 Hz, 1H), 7.76-7.72 (t, <i>J</i> = 8 Hz, 1H), 7.56 (br s, 1H), 7.50 (d, <i>J</i> = 8 Hz, 1H), 7.29-7.15 (m, 5H), 2.07 (s, 3H).</p> <p><b><sup>13</sup>C NMR</b> (100 MHz, CDCl<sub>3</sub>): δ 158.14, 136.51, 136.01, 134.42, 133.93,</p> |
|--|--------------------------------------------------------------------------------------------------------------------------------------------------------------------------------------------------------------------------------------------------------------------------------------------------------------------------------------------------------------------------------------------------------------------------------------------------------------------------------------------------------------------------------------|

|  |                                                                                                                                                                                                                                                                        |
|--|------------------------------------------------------------------------------------------------------------------------------------------------------------------------------------------------------------------------------------------------------------------------|
|  | 133.49, 129.71, 129.11, 128.84, 128.63, 128.58, 128.33, 128.02, 125.71, 125.16, 119.96, 118.53, 14.47.<br><br><b>HRMS</b> [M + H] <sup>+</sup> calculated for C <sub>24</sub> H <sub>15</sub> F <sub>3</sub> N <sub>2</sub> O <sub>2</sub> : 421.1164, found: 421.1192 |
|--|------------------------------------------------------------------------------------------------------------------------------------------------------------------------------------------------------------------------------------------------------------------------|

|                                                                                   |                                                                                                                                                                                                                                                                                                                                                                                                                                                                                                                                                                                                                                                                                                                                                                  |
|-----------------------------------------------------------------------------------|------------------------------------------------------------------------------------------------------------------------------------------------------------------------------------------------------------------------------------------------------------------------------------------------------------------------------------------------------------------------------------------------------------------------------------------------------------------------------------------------------------------------------------------------------------------------------------------------------------------------------------------------------------------------------------------------------------------------------------------------------------------|
| 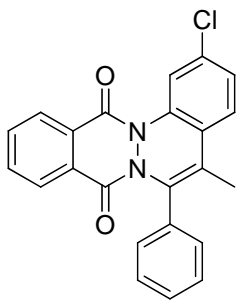 | <p><b>2-chloro-5-methyl-6-phenylphthalazino[2,3-a]cinnoline-8,13-dione 3ga</b></p> <p>Yellow solid, Yield; 71.5 mg, 88%</p> <p><b><sup>1</sup>H NMR</b> (400 MHz, CDCl<sub>3</sub>): δ 8.39 (d, <i>J</i> = 8 Hz, 1H), 8.05 (d, <i>J</i> = 8 Hz, 1H), 7.97 (s, 1H), 7.83-7.79 (t, <i>J</i> = 8 Hz, 1H), 7.75-7.71 (t, <i>J</i> = 8 Hz, 1H), 7.30-7.14 (m, 7H), 2.03 (s, 3H).</p> <p><b><sup>13</sup>C NMR</b> (100 MHz, CDCl<sub>3</sub>): δ 157.94, 156.18, 137.09, 135.21, 134.29, 133.90, 133.84, 133.69, 129.65, 129.16, 128.84, 128.53, 128.44, 128.26, 127.95, 126.39, 126.22, 125.32, 120.47, 118.40, 14.53.</p> <p><b>HRMS</b> [M + H]<sup>+</sup> calculated for C<sub>23</sub>H<sub>15</sub>ClN<sub>2</sub>O<sub>2</sub>: 387.0900, found: 387.0929</p> |
|-----------------------------------------------------------------------------------|------------------------------------------------------------------------------------------------------------------------------------------------------------------------------------------------------------------------------------------------------------------------------------------------------------------------------------------------------------------------------------------------------------------------------------------------------------------------------------------------------------------------------------------------------------------------------------------------------------------------------------------------------------------------------------------------------------------------------------------------------------------|

|                                                                                     |                                                                                                                                                                                                                                                                                                                                                                                                                                                                                                                                                                                                                                                                                                                                                                 |
|-------------------------------------------------------------------------------------|-----------------------------------------------------------------------------------------------------------------------------------------------------------------------------------------------------------------------------------------------------------------------------------------------------------------------------------------------------------------------------------------------------------------------------------------------------------------------------------------------------------------------------------------------------------------------------------------------------------------------------------------------------------------------------------------------------------------------------------------------------------------|
| 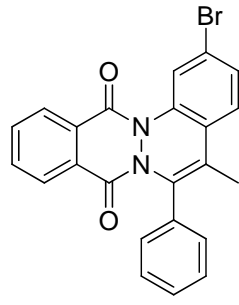 | <p><b>2-bromo-5-methyl-6-phenylphthalazino[2,3-a]cinnoline-8,13-dione 3ha</b></p> <p>Yellow solid, Yield; 74.2 mg, 82%</p> <p><b><sup>1</sup>H NMR</b> (400 MHz, CDCl<sub>3</sub>): δ 8.38 (d, <i>J</i> = 8 Hz, 1H), 8.12 (s, 1H), 8.05 (d, <i>J</i> = 8 Hz, 1H), 7.83-7.79 (t, <i>J</i> = 8 Hz, 1H), 7.75-7.71 (t, <i>J</i> = 8 Hz, 1H), 7.34-7.14 (m, 7H), 2.03 (s, 3H).</p> <p><b><sup>13</sup>C NMR</b> (100 MHz, CDCl<sub>3</sub>): δ 157.93, 156.17, 137.17, 135.37, 134.29, 133.85, 133.68, 129.65, 129.32, 129.16, 128.83, 128.53, 128.46, 128.26, 127.95, 126.67, 125.53, 121.74, 121.17, 120.50, 14.47.</p> <p><b>HRMS</b> [M + H]<sup>+</sup> calculated for C<sub>23</sub>H<sub>15</sub>BrN<sub>2</sub>O<sub>2</sub>: 431.0395, found: 431.0415</p> |
|-------------------------------------------------------------------------------------|-----------------------------------------------------------------------------------------------------------------------------------------------------------------------------------------------------------------------------------------------------------------------------------------------------------------------------------------------------------------------------------------------------------------------------------------------------------------------------------------------------------------------------------------------------------------------------------------------------------------------------------------------------------------------------------------------------------------------------------------------------------------|

|                                                                                     |                                                                                                                                                                                                                                                                                                                                                                                                                                                                                                                                                                                                                                                                         |
|-------------------------------------------------------------------------------------|-------------------------------------------------------------------------------------------------------------------------------------------------------------------------------------------------------------------------------------------------------------------------------------------------------------------------------------------------------------------------------------------------------------------------------------------------------------------------------------------------------------------------------------------------------------------------------------------------------------------------------------------------------------------------|
| 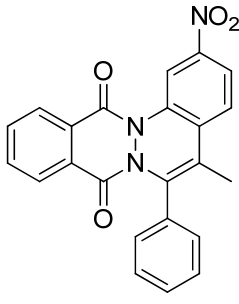 | <p><b>5-methyl-2-nitro-6-phenylphthalazino[2,3-a]cinnoline-8,13-dione 3ia</b></p> <p>Yellow solid, Yield; 66.8 mg, 80%</p> <p><b><sup>1</sup>H NMR</b> (400 MHz, CDCl<sub>3</sub>): δ 8.79(d, <i>J</i> = 4 Hz, 1H), 8.42 (d, <i>J</i> = 8 Hz, 1H), 8.06 (d, <i>J</i> = 8 Hz, 2H), 7.86-7.82 (t, <i>J</i> = 8 Hz, 1H), 7.78-7.74 (t, <i>J</i> = 8 Hz, 1H), 7.46 (d, <i>J</i> = 8 Hz, 1H), 7.32-7.29 (m, 3H), 7.18-7.15 (m, 2H), 2.07 (s, 3H).</p> <p><b><sup>13</sup>C NMR</b> (100 MHz, CDCl<sub>3</sub>): δ 158.00, 156.24, 146.87, 138.59, 136.79, 134.59, 134.21, 133.76, 133.14, 129.56, 128.97, 128.77, 128.44, 128.08, 124.75, 121.20, 119.39, 113.89, 14.56.</p> |
|-------------------------------------------------------------------------------------|-------------------------------------------------------------------------------------------------------------------------------------------------------------------------------------------------------------------------------------------------------------------------------------------------------------------------------------------------------------------------------------------------------------------------------------------------------------------------------------------------------------------------------------------------------------------------------------------------------------------------------------------------------------------------|

|  |                                                                                                                                           |
|--|-------------------------------------------------------------------------------------------------------------------------------------------|
|  | <b>HRMS</b> [M + H] <sup>+</sup> calculated for C <sub>23</sub> H <sub>15</sub> N <sub>3</sub> O <sub>4</sub> : 398.1141, found: 398.1168 |
|--|-------------------------------------------------------------------------------------------------------------------------------------------|

|                                                                                   |                                                                                                                                                                                                                                                                                                                                                                                                                                                                                                                                                                                                                                                                                          |
|-----------------------------------------------------------------------------------|------------------------------------------------------------------------------------------------------------------------------------------------------------------------------------------------------------------------------------------------------------------------------------------------------------------------------------------------------------------------------------------------------------------------------------------------------------------------------------------------------------------------------------------------------------------------------------------------------------------------------------------------------------------------------------------|
| 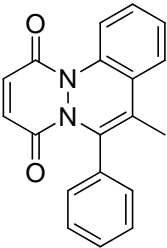 | <p><b>7-methyl-6-phenylpyridazino[1,2-a]cinnoline-1,4-dione 5aa</b></p> <p>Red solid, Yield; 54.0 mg, 85%</p> <p><b><sup>1</sup>H NMR</b> (400 MHz, CDCl<sub>3</sub>): δ 8.08 (d, <i>J</i> = 8 Hz, 1H), 7.37-7.23 (m, 6H), 7.19 (d, <i>J</i> = 8 Hz, 1H), 6.99 (d, <i>J</i> = 8 Hz, 1H), 6.75 (d, <i>J</i> = 12 Hz, 1H), 2.01 (s, 3H).</p> <p><b><sup>13</sup>C NMR</b> (100 MHz, CDCl<sub>3</sub>): δ 156.70, 155.05, 135.58, 135.35, 134.94, 134.64, 133.46, 128.92, 128.44, 128.34, 128.27, 126.87, 126.66, 124.33, 121.03, 117.52, 14.50.</p> <p><b>HRMS</b> [M + H]<sup>+</sup> calculated for C<sub>19</sub>H<sub>14</sub>N<sub>2</sub>O<sub>2</sub>: 303.1134, found:303.1128</p> |
|-----------------------------------------------------------------------------------|------------------------------------------------------------------------------------------------------------------------------------------------------------------------------------------------------------------------------------------------------------------------------------------------------------------------------------------------------------------------------------------------------------------------------------------------------------------------------------------------------------------------------------------------------------------------------------------------------------------------------------------------------------------------------------------|

|                                                                                     |                                                                                                                                                                                                                                                                                                                                                                                                                                                                                                                                                                                                                                                                                                                                                      |
|-------------------------------------------------------------------------------------|------------------------------------------------------------------------------------------------------------------------------------------------------------------------------------------------------------------------------------------------------------------------------------------------------------------------------------------------------------------------------------------------------------------------------------------------------------------------------------------------------------------------------------------------------------------------------------------------------------------------------------------------------------------------------------------------------------------------------------------------------|
| 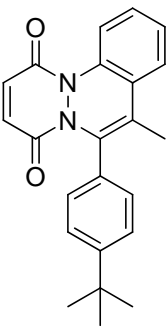 | <p><b>6-(4-(tert-butyl)phenyl)-7-methylpyridazino[1,2-a]cinnoline-1,4-dione 5ab</b></p> <p>Red solid, Yield; 62.5 mg, 83%</p> <p><b><sup>1</sup>H NMR</b> (400 MHz, CDCl<sub>3</sub>): δ 8.07 (d, <i>J</i> = 8 Hz, 1H), 7.36-7.30 (m, 3H), 7.26-7.18 (m, 2H), 7.09 (d, <i>J</i> = 8 Hz, 1H), 6.99 (d, <i>J</i> = 12 Hz, 1H), 6.76 (d, <i>J</i> = 12 Hz, 1H), 2.01 (s, 3H), 1.26 (s, 12H).</p> <p><b><sup>13</sup>C NMR</b> (100 MHz, CDCl<sub>3</sub>): δ 156.80, 155.11, 151.29, 135.62, 135.38, 134.84, 134.75, 130.30, 128.55, 128.17, 127.08, 126.61, 125.16, 124.33, 120.83, 117.42, 31.29, 14.63.</p> <p><b>HRMS</b> [M + Na]<sup>+</sup> calculated for C<sub>23</sub>H<sub>22</sub>N<sub>2</sub>O<sub>2</sub>: 381.1579, found: 381.1573</p> |
|-------------------------------------------------------------------------------------|------------------------------------------------------------------------------------------------------------------------------------------------------------------------------------------------------------------------------------------------------------------------------------------------------------------------------------------------------------------------------------------------------------------------------------------------------------------------------------------------------------------------------------------------------------------------------------------------------------------------------------------------------------------------------------------------------------------------------------------------------|

|                                                                                     |                                                                                                                                                                                                                                                                                                                                                                                                                                                                                                                                                                                                                                                  |
|-------------------------------------------------------------------------------------|--------------------------------------------------------------------------------------------------------------------------------------------------------------------------------------------------------------------------------------------------------------------------------------------------------------------------------------------------------------------------------------------------------------------------------------------------------------------------------------------------------------------------------------------------------------------------------------------------------------------------------------------------|
| 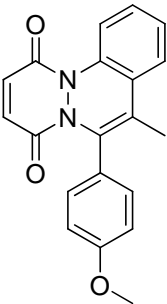 | <p><b>6-(4-methoxyphenyl)-7-methylpyridazino[1,2-a]cinnoline-1,4-dione 5ac</b></p> <p>Red solid, Yield; 57.3 mg, 82%</p> <p><b><sup>1</sup>H NMR</b> (400 MHz, CDCl<sub>3</sub>): δ 8.06 (d, <i>J</i> = 8 Hz, 1H), 7.35 (d, <i>J</i> = 8 Hz, 1H), 7.27-7.20 (m, 2H), 7.11 (d, <i>J</i> = 8 Hz, 1H), 6.99 (d, <i>J</i> = 12 Hz, 1H), 6.85 (d, <i>J</i> = 8 Hz, 1H), 6.75 (d, <i>J</i> = 12 Hz, 1H), 3.75 (s, 3H), 2.00 (s, 3H).</p> <p><b><sup>13</sup>C NMR</b> (100 MHz, CDCl<sub>3</sub>): δ 159.47, 156.75, 155.13, 135.62, 135.33, 134.83, 134.60, 130.24, 128.12, 127.06, 126.61, 125.59, 124.25, 120.56, 117.49, 113.75, 55.23, 14.48.</p> |
|-------------------------------------------------------------------------------------|--------------------------------------------------------------------------------------------------------------------------------------------------------------------------------------------------------------------------------------------------------------------------------------------------------------------------------------------------------------------------------------------------------------------------------------------------------------------------------------------------------------------------------------------------------------------------------------------------------------------------------------------------|

|  |                                                                                                                                           |
|--|-------------------------------------------------------------------------------------------------------------------------------------------|
|  | <b>HRMS</b> [M + H] <sup>+</sup> calculated for C <sub>20</sub> H <sub>16</sub> N <sub>2</sub> O <sub>3</sub> : 333.1239, found: 333.1209 |
|--|-------------------------------------------------------------------------------------------------------------------------------------------|

|                                                                                   |                                                                                                                                                                                                                                                                                                                                                                                                                                                                                                                                                                                                                                                                                                                                                                              |
|-----------------------------------------------------------------------------------|------------------------------------------------------------------------------------------------------------------------------------------------------------------------------------------------------------------------------------------------------------------------------------------------------------------------------------------------------------------------------------------------------------------------------------------------------------------------------------------------------------------------------------------------------------------------------------------------------------------------------------------------------------------------------------------------------------------------------------------------------------------------------|
| 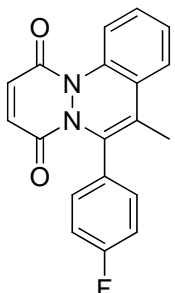 | <p><b>6-(4-fluorophenyl)-7-methylpyridazino[1,2-a]cinnoline-1,4-dione 5ad</b></p> <p>Red solid, Yield; 57.2 mg, 85%</p> <p><b><sup>1</sup>H NMR</b> (400 MHz, CDCl<sub>3</sub>): δ 8.07 (d, <i>J</i> = 8 Hz, 1H), 7.36 (d, <i>J</i> = 8 Hz, 1H), 7.29 (m, 7H), 6.74 (d, <i>J</i> = 8 Hz, 1H), 1.99 (s, 3H).</p> <p><b><sup>13</sup>C NMR</b> (100 MHz, CDCl<sub>3</sub>): δ 162.37 (d, <i>J</i> = 247 Hz, C-F coupling), 156.66, 155.00, 135.60, 135.29, 135.05, 133.64, 130.83 and 130.74 (F coupling), 129.43, 129.40, 128.48, 126.71 and 126.66 (F coupling), 124.34, 121.35, 117.53, 115.59 and 115.37 (F coupling), 14.48.</p> <p><b>HRMS</b> [M + H]<sup>+</sup> calculated for C<sub>19</sub>H<sub>13</sub>FN<sub>2</sub>O<sub>2</sub>: 321.1039, found: 321.1011</p> |
|-----------------------------------------------------------------------------------|------------------------------------------------------------------------------------------------------------------------------------------------------------------------------------------------------------------------------------------------------------------------------------------------------------------------------------------------------------------------------------------------------------------------------------------------------------------------------------------------------------------------------------------------------------------------------------------------------------------------------------------------------------------------------------------------------------------------------------------------------------------------------|

|                                                                                     |                                                                                                                                                                                                                                                                                                                                                                                                                                                                                                                                                                                                                                                                                                    |
|-------------------------------------------------------------------------------------|----------------------------------------------------------------------------------------------------------------------------------------------------------------------------------------------------------------------------------------------------------------------------------------------------------------------------------------------------------------------------------------------------------------------------------------------------------------------------------------------------------------------------------------------------------------------------------------------------------------------------------------------------------------------------------------------------|
| 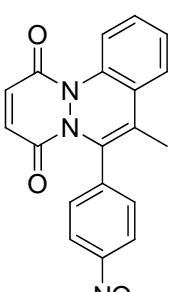 | <p><b>7-methyl-6-(4-nitrophenyl)pyridazino[1,2-a]cinnoline-1,4-dione 5ae</b></p> <p>Red solid, Yield; 68.6 mg, 94%</p> <p><b><sup>1</sup>H NMR</b> (400 MHz, CDCl<sub>3</sub>): δ 8.20 (d, <i>J</i> = 8 Hz, 2H), 8.11 (d, <i>J</i> = 8 Hz, 1H), 7.40-7.26 (m, 5H), 7.04 (d, <i>J</i> = 12 Hz, 1H), 6.76 (d, <i>J</i> = 8 Hz, 1H), 2.03 (s, 3H).</p> <p><b><sup>13</sup>C NMR</b> (100 MHz, CDCl<sub>3</sub>): δ 156.53, 154.84, 147.34, 140.28, 135.70, 135.52, 135.01, 132.12, 129.79, 129.21, 126.82, 125.99, 124.58, 123.64, 123.08, 117.48, 14.54.</p> <p><b>HRMS</b> [M + H]<sup>+</sup> calculated for C<sub>19</sub>H<sub>13</sub>N<sub>3</sub>O<sub>4</sub>: 348.0984, found: 348.0101</p> |
|-------------------------------------------------------------------------------------|----------------------------------------------------------------------------------------------------------------------------------------------------------------------------------------------------------------------------------------------------------------------------------------------------------------------------------------------------------------------------------------------------------------------------------------------------------------------------------------------------------------------------------------------------------------------------------------------------------------------------------------------------------------------------------------------------|

|                                                                                     |                                                                                                                                                                                                                                                                                                                                                                                                                                                                                                                                                                                                                                                                                                      |
|-------------------------------------------------------------------------------------|------------------------------------------------------------------------------------------------------------------------------------------------------------------------------------------------------------------------------------------------------------------------------------------------------------------------------------------------------------------------------------------------------------------------------------------------------------------------------------------------------------------------------------------------------------------------------------------------------------------------------------------------------------------------------------------------------|
| 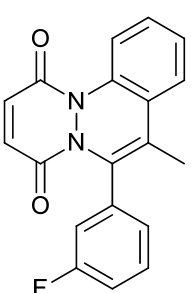 | <p><b>6-(3-fluorophenyl)-7-methylpyridazino[1,2-a]cinnoline-1,4-dione 5af</b></p> <p>Red solid, Yield; 53.9mg, 80%</p> <p><b><sup>1</sup>H NMR</b> (400 MHz, CDCl<sub>3</sub>): δ 8.07 (d, <i>J</i> = 8 Hz, 1H), 7.37 (d, <i>J</i> = 8 Hz, 1H), 7.31-7.21 (m, 3H), 7.00-6.88 (m, 4H), 6.75 (d, <i>J</i> = 8 Hz, 1H), 2.01 (s, 3H).</p> <p><b><sup>13</sup>C NMR</b> (100 MHz, CDCl<sub>3</sub>): δ 161.50 (d, <i>J</i> = 246 Hz), 156.63, 154.97, 135.66, 135.64, 135.56, 135.24 and 135.14 (F coupling), 133.25, 133.23, 129.86 and 129.77 (F coupling), 128.64, 126.69, 126.53, 124.72, 124.69 and 124.43 (F coupling), 121.73, 117.49, 116.11 (d, <i>J</i> = 22 Hz), 115.46 (d, <i>J</i> = 21</p> |
|-------------------------------------------------------------------------------------|------------------------------------------------------------------------------------------------------------------------------------------------------------------------------------------------------------------------------------------------------------------------------------------------------------------------------------------------------------------------------------------------------------------------------------------------------------------------------------------------------------------------------------------------------------------------------------------------------------------------------------------------------------------------------------------------------|



|  |                                                                                                                                                           |
|--|-----------------------------------------------------------------------------------------------------------------------------------------------------------|
|  | Hz), 14.50.<br><b>HRMS</b> [M + H] <sup>+</sup> calculated for C <sub>19</sub> H <sub>13</sub> FN <sub>2</sub> O <sub>2</sub> : 321.1039, found: 321.1022 |
|--|-----------------------------------------------------------------------------------------------------------------------------------------------------------|

|                                                                                   |                                                                                                                                                                                                                                                                                                                                                                                                                                                                                                                                                                                                                                                                                                                                                                                                                                                                                                            |
|-----------------------------------------------------------------------------------|------------------------------------------------------------------------------------------------------------------------------------------------------------------------------------------------------------------------------------------------------------------------------------------------------------------------------------------------------------------------------------------------------------------------------------------------------------------------------------------------------------------------------------------------------------------------------------------------------------------------------------------------------------------------------------------------------------------------------------------------------------------------------------------------------------------------------------------------------------------------------------------------------------|
| 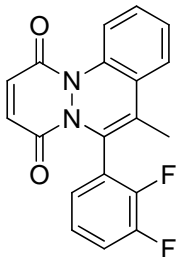 | <p><b>6-(2,3-difluorophenyl)-7-methylpyridazino[1,2-a]cinnoline-1,4-dione 5ah</b></p> <p>Red solid, Yield; 54.7 mg, 77%</p> <p><b><sup>1</sup>H NMR</b> (400 MHz, CDCl<sub>3</sub>): δ 8.08 (d, <i>J</i> = 8 Hz, 1H), 7.39 (d, <i>J</i> = 8 Hz, 1H), 7.33 (t, <i>J</i> = 8 Hz, 1H), 7.26 (t, <i>J</i> = 8 Hz, 1H), 7.12-6.97 (m, 4H), 6.76 (d, <i>J</i> = 8 Hz, 1H), 2.01 (s, 3H).</p> <p><b><sup>13</sup>C NMR</b> (100 MHz, CDCl<sub>3</sub>): δ 156.55, 154.58, 151.77, 149.31 and 149.08 (F coupling), 146.61 and 146.48 (F coupling), 135.64, 135.35, 134.73, 128.95, 127.83, 126.71 and 126.06 (F coupling), 124.41, 123.98, 123.93, 123.91, 123.86, 123.66, 123.18 and 123.07 (F coupling), 117.91, 117.72 and 117.55 (F coupling), 14.51.</p> <p><b>HRMS</b> [M + H]<sup>+</sup> calculated for C<sub>19</sub>H<sub>12</sub>F<sub>2</sub>N<sub>2</sub>O<sub>2</sub>: 339.0945, found: 339.0955</p> |
|-----------------------------------------------------------------------------------|------------------------------------------------------------------------------------------------------------------------------------------------------------------------------------------------------------------------------------------------------------------------------------------------------------------------------------------------------------------------------------------------------------------------------------------------------------------------------------------------------------------------------------------------------------------------------------------------------------------------------------------------------------------------------------------------------------------------------------------------------------------------------------------------------------------------------------------------------------------------------------------------------------|

|                                                                                     |                                                                                                                                                                                                                                                                                                                                                                                                                                                                                                                                                                                                                                                                                                                                                 |
|-------------------------------------------------------------------------------------|-------------------------------------------------------------------------------------------------------------------------------------------------------------------------------------------------------------------------------------------------------------------------------------------------------------------------------------------------------------------------------------------------------------------------------------------------------------------------------------------------------------------------------------------------------------------------------------------------------------------------------------------------------------------------------------------------------------------------------------------------|
| 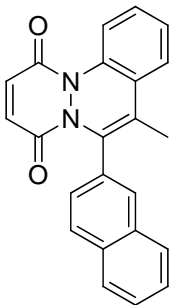 | <p><b>7-methyl-6-(naphthalen-2-yl)pyridazino[1,2-a]cinnoline-1,4-dione 5aj</b></p> <p>Red solid, Yield; 59.2 mg, 80%</p> <p><b><sup>1</sup>H NMR</b> (400 MHz, CDCl<sub>3</sub>): δ 7.11 (d, <i>J</i> = 8 Hz, 1H), 7.79-7.74 (m, 3H), 7.67 (s, 1H), 7.44-7.24 (m, 6H), 7.03 (d, <i>J</i> = 12 Hz, 1H), 6.75 (d, <i>J</i> = 8 Hz, 1H), 2.05 (s, 3H).</p> <p><b><sup>13</sup>C NMR</b> (100 MHz, CDCl<sub>3</sub>): δ 156.75, 155.08, 135.63, 135.35, 135.05, 134.59, 133.00, 132.90, 130.87, 128.42, 128.23, 128.00, 127.84, 126.87, 126.71, 126.66, 126.49, 126.28, 124.39, 121.53, 117.52, 14.62.</p> <p><b>HRMS</b> [M + Na]<sup>+</sup> calculated for C<sub>23</sub>H<sub>16</sub>N<sub>2</sub>O<sub>2</sub>: 375.1109, found: 353.1104</p> |
|-------------------------------------------------------------------------------------|-------------------------------------------------------------------------------------------------------------------------------------------------------------------------------------------------------------------------------------------------------------------------------------------------------------------------------------------------------------------------------------------------------------------------------------------------------------------------------------------------------------------------------------------------------------------------------------------------------------------------------------------------------------------------------------------------------------------------------------------------|

|                                                                                     |                                                                                                                                                                                                                                                                                                                                                                                                                                                                                                                                          |
|-------------------------------------------------------------------------------------|------------------------------------------------------------------------------------------------------------------------------------------------------------------------------------------------------------------------------------------------------------------------------------------------------------------------------------------------------------------------------------------------------------------------------------------------------------------------------------------------------------------------------------------|
| 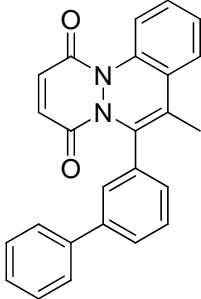 | <p><b>6-([1,1'-biphenyl]-3-yl)-7-methylpyridazino[1,2-a]cinnoline-1,4-dione 5ak</b></p> <p>Red solid, Yield; 59.6 mg, 75%</p> <p><b><sup>1</sup>H NMR</b> (400 MHz, CDCl<sub>3</sub>): δ 8.01 (d, <i>J</i> = 8 Hz, 1H), 7.51(d, <i>J</i> = 8 Hz, 3H), 7.41-7.16 (m, 9H), 7.00 (d, <i>J</i> = 8 Hz, 1H), 6.76 (d, <i>J</i> = 8 Hz, 1H), 2.06 (s, 3H).</p> <p><b><sup>13</sup>C NMR</b> (100 MHz, CDCl<sub>3</sub>): δ 156.72, 155.08, 141.28, 140.61, 135.66, 135.33, 135.04, 134.56, 134.01, 128.81, 128.67, 128.41, 127.86, 127.63,</p> |
|-------------------------------------------------------------------------------------|------------------------------------------------------------------------------------------------------------------------------------------------------------------------------------------------------------------------------------------------------------------------------------------------------------------------------------------------------------------------------------------------------------------------------------------------------------------------------------------------------------------------------------------|

|  |                                                                                                                                                                                                             |
|--|-------------------------------------------------------------------------------------------------------------------------------------------------------------------------------------------------------------|
|  | 127.55, 127.25, 126.83, 126.67, 124.37, 121.28, 117.50, 14.62.<br><b>HRMS</b> [M + H] <sup>+</sup> calculated for C <sub>25</sub> H <sub>18</sub> N <sub>2</sub> O <sub>2</sub> : 379.1447, found: 379.1119 |
|--|-------------------------------------------------------------------------------------------------------------------------------------------------------------------------------------------------------------|

|                                                                                   |                                                                                                                                                                                                                                                                                                                                                                                                                                                                                                                                                                                                                                                                                                                                 |
|-----------------------------------------------------------------------------------|---------------------------------------------------------------------------------------------------------------------------------------------------------------------------------------------------------------------------------------------------------------------------------------------------------------------------------------------------------------------------------------------------------------------------------------------------------------------------------------------------------------------------------------------------------------------------------------------------------------------------------------------------------------------------------------------------------------------------------|
| 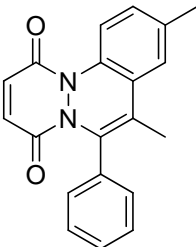 | <p><b>7,9-dimethyl-6-phenylpyridazino[1,2-a]cinnoline-1,4-dione 5ba</b></p> <p>Red solid, Yield; 53.9 mg, 81%</p> <p><b><sup>1</sup>H NMR</b> (400 MHz, CDCl<sub>3</sub>): δ 7.98 (d, <i>J</i> = 8 Hz, 1H), 7.33-7.26 (m, 3H), 7.18-7.15 (m, 2H), 7.08 (d, <i>J</i> = 8 Hz, 1H), 6.98 (d, <i>J</i> = 12 Hz, 1H), 6.73 (d, <i>J</i> = 12 Hz, 1H), 2.32 (s, 3H), 1.99 (s, 3H).</p> <p><b><sup>13</sup>C NMR</b> (100 MHz, CDCl<sub>3</sub>): δ 156.51, 155.11, 136.48, 135.09, 134.92, 134.54, 133.62, 133.26, 128.94, 128.36, 128.23, 126.67, 124.66, 121.01, 117.39, 21.19, 14.50.</p> <p><b>HRMS</b> [M + Na]<sup>+</sup> calculated for C<sub>20</sub>H<sub>16</sub>N<sub>2</sub>O<sub>2</sub>: 339.1109, found: 339.1104</p> |
|-----------------------------------------------------------------------------------|---------------------------------------------------------------------------------------------------------------------------------------------------------------------------------------------------------------------------------------------------------------------------------------------------------------------------------------------------------------------------------------------------------------------------------------------------------------------------------------------------------------------------------------------------------------------------------------------------------------------------------------------------------------------------------------------------------------------------------|

|                                                                                     |                                                                                                                                                                                                                                                                                                                                                                                                                                                                                                                                                                                                                                                                                                                                                                                                                                                            |
|-------------------------------------------------------------------------------------|------------------------------------------------------------------------------------------------------------------------------------------------------------------------------------------------------------------------------------------------------------------------------------------------------------------------------------------------------------------------------------------------------------------------------------------------------------------------------------------------------------------------------------------------------------------------------------------------------------------------------------------------------------------------------------------------------------------------------------------------------------------------------------------------------------------------------------------------------------|
| 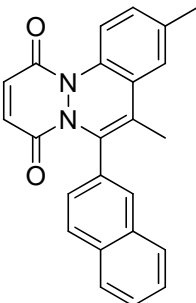 | <p><b>7,9-dimethyl-6-(naphthalen-2-yl)pyridazino[1,2-a]cinnoline-1,4-dione 5bj</b></p> <p>Red solid, Yield; 60.1 mg, 78%</p> <p><b><sup>1</sup>H NMR</b> (400 MHz, CDCl<sub>3</sub>): δ 8.02 (d, <i>J</i> = 8 Hz, 1H), 7.78-7.76 (m, 3H), 7.66 (s, 1H), 7.43-7.41 (m, 2H), 7.25 (d, <i>J</i> = 8 Hz, 1H), 7.18 (s, 1H), 7.11 (d, <i>J</i> = 8 Hz, 1H), 7.02 (d, <i>J</i> = 8 Hz, 1H), 6.73 (d, <i>J</i> = 8 Hz, 1H), 2.34 (s, 3H), 2.03 (s, 3H).</p> <p><b><sup>13</sup>C NMR</b> (100 MHz, CDCl<sub>3</sub>): δ 156.57, 155.14, 136.54, 135.09, 135.04, 134.44, 133.28, 132.98, 132.90, 131.01, 129.02, 128.38, 128.22, 127.95, 127.84, 126.65, 126.62, 126.45, 126.34, 124.73, 121.53, 117.39, 21.24, 14.63.</p> <p><b>HRMS</b> [M + H]<sup>+</sup> calculated for C<sub>24</sub>H<sub>18</sub>N<sub>2</sub>O<sub>2</sub>: 367.1447, found: 367.1441</p> |
|-------------------------------------------------------------------------------------|------------------------------------------------------------------------------------------------------------------------------------------------------------------------------------------------------------------------------------------------------------------------------------------------------------------------------------------------------------------------------------------------------------------------------------------------------------------------------------------------------------------------------------------------------------------------------------------------------------------------------------------------------------------------------------------------------------------------------------------------------------------------------------------------------------------------------------------------------------|

|                                                                                     |                                                                                                                                                                                                                                                                                                                                                                                                                                                                                                                                                                                                                                          |
|-------------------------------------------------------------------------------------|------------------------------------------------------------------------------------------------------------------------------------------------------------------------------------------------------------------------------------------------------------------------------------------------------------------------------------------------------------------------------------------------------------------------------------------------------------------------------------------------------------------------------------------------------------------------------------------------------------------------------------------|
| 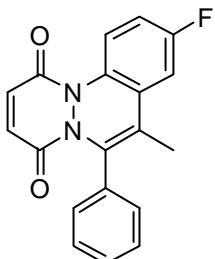 | <p><b>9-fluoro-7-methyl-6-phenylpyridazino[1,2-a]cinnoline-1,4-dione 5ca</b></p> <p>Red solid, Yield; 50.5 mg, 75%</p> <p><b><sup>1</sup>H NMR</b> (400 MHz, CDCl<sub>3</sub>): δ 8.08 (br m, 1H), 7.34-7.28 (m, 3H), 7.17 (d, <i>J</i> = 8 Hz, 2H), 7.03 (d, <i>J</i> = 8 Hz, 1H), 6.98-6.93 (m, 2H), 6.74 (d, <i>J</i> = 8 Hz, 1H), 1.97 (s, 3H).</p> <p><b><sup>13</sup>C NMR</b> (100 MHz, CDCl<sub>3</sub>): δ 160.57 (d, <i>J</i> = 245 Hz, C-F coupling), 156.45, 155.10, 135.91, 135.11 (d, <i>J</i> = 35 Hz, C-F coupling), 133.12, 131.53, 129.33, 129.25, 128.87, 128.67, 128.34, 120.01, 119.73 and 119.64 (F coupling),</p> |
|-------------------------------------------------------------------------------------|------------------------------------------------------------------------------------------------------------------------------------------------------------------------------------------------------------------------------------------------------------------------------------------------------------------------------------------------------------------------------------------------------------------------------------------------------------------------------------------------------------------------------------------------------------------------------------------------------------------------------------------|

|  |                                                                                                                                                                                                                                        |
|--|----------------------------------------------------------------------------------------------------------------------------------------------------------------------------------------------------------------------------------------|
|  | <p>114.86 (d, <math>J = 23</math> Hz, C-F coupling), 110.90 (d, <math>J = 24</math> Hz, C-F coupling), 14.43.</p> <p><b>HRMS</b> <math>[M + H]^+</math> calculated for <math>C_{19}H_{13}FN_2O_2</math>: 321.1039, found: 321.1011</p> |
|--|----------------------------------------------------------------------------------------------------------------------------------------------------------------------------------------------------------------------------------------|

|                                                                                   |                                                                                                                                                                                                                                                                                                                                                                                                                                                                                                                                                                                                                                                                                                                                 |
|-----------------------------------------------------------------------------------|---------------------------------------------------------------------------------------------------------------------------------------------------------------------------------------------------------------------------------------------------------------------------------------------------------------------------------------------------------------------------------------------------------------------------------------------------------------------------------------------------------------------------------------------------------------------------------------------------------------------------------------------------------------------------------------------------------------------------------|
| 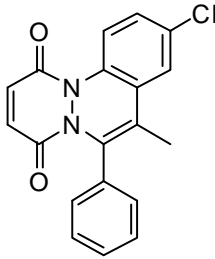 | <p><b>9-chloro-7-methyl-6-phenylpyridazino[1,2-a]cinnoline-1,4-dione 5da</b></p> <p>Red solid, Yield; 54.4 mg, 77%</p> <p><b><math>^1H</math> NMR</b> (400 MHz, <math>CDCl_3</math>): <math>\delta</math> 8.03 (d, <math>J = 8</math> Hz, 1H), 7.34-7.28 (m, 4H), 7.23-7.15 (m, 3H), 6.98 (d, <math>J = 8</math> Hz, 1H), 6.75 (d, <math>J = 8</math> Hz, 1H), 1.98 (s, 3H).</p> <p><b><math>^{13}C</math> NMR</b> (100 MHz, <math>CDCl_3</math>): <math>\delta</math> 156.56, 155.00, 135.81, 135.46, 134.87, 134.00, 133.09, 132.10, 128.85, 128.69, 128.36, 128.05, 124.18, 119.94, 119.03, 14.45.</p> <p><b>HRMS</b> <math>[M + H]^+</math> calculated for <math>C_{19}H_{13}ClN_2O_2</math>: 337.0744, found: 337.0723</p> |
|-----------------------------------------------------------------------------------|---------------------------------------------------------------------------------------------------------------------------------------------------------------------------------------------------------------------------------------------------------------------------------------------------------------------------------------------------------------------------------------------------------------------------------------------------------------------------------------------------------------------------------------------------------------------------------------------------------------------------------------------------------------------------------------------------------------------------------|

|                                                                                     |                                                                                                                                                                                                                                                                                                                                                                                                                                                                                                                                                                                                                                                                                                                   |
|-------------------------------------------------------------------------------------|-------------------------------------------------------------------------------------------------------------------------------------------------------------------------------------------------------------------------------------------------------------------------------------------------------------------------------------------------------------------------------------------------------------------------------------------------------------------------------------------------------------------------------------------------------------------------------------------------------------------------------------------------------------------------------------------------------------------|
| 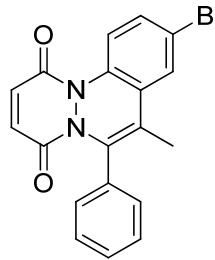 | <p><b>9-bromo-7-methyl-6-phenylpyridazino[1,2-a]cinnoline-1,4-dione 5ea</b></p> <p>Red solid, Yield; 64 mg, 80%</p> <p><b><math>^1H</math> NMR</b> (400 MHz, <math>CDCl_3</math>): <math>\delta</math> 7.97 (d, <math>J = 8</math> Hz, 1H), 7.45-7.15 (m, 7H), 6.98 (d, <math>J = 8</math> Hz, 1H), 6.76 (d, <math>J = 8</math> Hz, 1H), 1.98 (s, 3H).</p> <p><b><math>^{13}C</math> NMR</b> (100 MHz, <math>CDCl_3</math>): <math>\delta</math> 156.56, 154.99, 135.81, 135.48, 134.87, 134.52, 133.06, 130.99, 128.98, 128.85, 128.70, 128.36, 127.14, 119.89, 119.86, 119.24, 14.46.</p> <p><b>HRMS</b> <math>[M + H]^+</math> calculated for <math>C_{19}H_{13}BrN_2O_2</math>: 381.0239, found: 381.0233</p> |
|-------------------------------------------------------------------------------------|-------------------------------------------------------------------------------------------------------------------------------------------------------------------------------------------------------------------------------------------------------------------------------------------------------------------------------------------------------------------------------------------------------------------------------------------------------------------------------------------------------------------------------------------------------------------------------------------------------------------------------------------------------------------------------------------------------------------|

|                                                                                     |                                                                                                                                                                                                                                                                                                                                                                                                                                                                                                                                                                                                                                                                                                                                                                          |
|-------------------------------------------------------------------------------------|--------------------------------------------------------------------------------------------------------------------------------------------------------------------------------------------------------------------------------------------------------------------------------------------------------------------------------------------------------------------------------------------------------------------------------------------------------------------------------------------------------------------------------------------------------------------------------------------------------------------------------------------------------------------------------------------------------------------------------------------------------------------------|
| 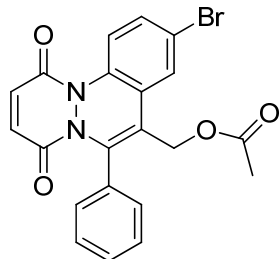 | <p><b>(9-bromo-1,4-dioxo-6-phenyl-1,4-dihydropyridazino[1,2-a]cinnolin-7-yl)methyl acetate 6ea</b></p> <p>Red solid, Yield; 9.2 mg, 10%</p> <p><b><math>^1H</math> NMR</b> (400 MHz, <math>CDCl_3</math>): <math>\delta</math> 7.91 (d, <math>J = 8</math> Hz, 1H), 7.43-7.16 (m, 7H), 7.02 (d, <math>J = 8</math> Hz, 1H), 6.77 (d, <math>J = 12</math> Hz, 1H), 4.76 (s, 2H), 2.02 (s, 3H).</p> <p><b><math>^{13}C</math> NMR</b> (100 MHz, <math>CDCl_3</math>): <math>\delta</math> 170.51, 156.27, 155.39, 141.21, 135.51, 135.25, 134.58, 131.46, 131.39, 129.69, 128.92, 128.62, 128.60, 127.00, 120.20, 119.89, 117.96, 59.91, 20.92.</p> <p><b>HRMS</b> <math>[M + Na]^+</math> calculated for <math>C_{21}H_{15}BrN_2O_4</math>: 461.0113, found: 461.0129</p> |
|-------------------------------------------------------------------------------------|--------------------------------------------------------------------------------------------------------------------------------------------------------------------------------------------------------------------------------------------------------------------------------------------------------------------------------------------------------------------------------------------------------------------------------------------------------------------------------------------------------------------------------------------------------------------------------------------------------------------------------------------------------------------------------------------------------------------------------------------------------------------------|

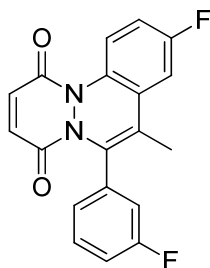

**9-fluoro-6-(3-fluorophenyl)-7-methylpyridazino[1,2-*a*]cinnoline-1,4-dione 5cf**

Red solid, Yield; 62.6 mg, 88%

**<sup>1</sup>H NMR** (400 MHz, CDCl<sub>3</sub>): δ 8.09 (dd, *J* = 8 Hz, 1H), 7.32-7.27 (m, 1H), 7.05-6.87 (m, 6H), 6.76 (d, *J* = 8 Hz, 1H), 1.98 (s, 3H).

**<sup>13</sup>C NMR** (100 MHz, CDCl<sub>3</sub>): δ 162.69 (d, *J* = 208 Hz, C-F coupling), 160.23 (d, *J* = 207 Hz, C-F coupling), 156.66, 156.28, 135.74 (d, *J* = 6 Hz, C-F coupling), 134.88, 134.17, 134.00, 132.20, 132.17, 129.87, 129.79, 129.65, 129.56, 129.46 and 129.33 (F coupling), 128.52, 127.89, 124.67, 120.72, 120.70, 120.21 and 120.13 (F coupling) 116.12, 115.91, 115.68, 115.47 and 115.21 (F coupling), 114.98, 111.59 (d, *J* = 25 Hz, C-F coupling), 14.50.

**HRMS** [M + H]<sup>+</sup> calculated for C<sub>19</sub>H<sub>12</sub>F<sub>2</sub>N<sub>2</sub>O<sub>2</sub>: 339.0945, found: 339.0924

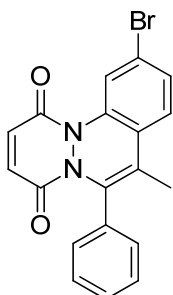

**10-bromo-7-methyl-6-phenylpyridazino[1,2-*a*]cinnoline-1,4-dione 5ha**

Red solid, Yield; 62.3 mg, 78%

**<sup>1</sup>H NMR** (400 MHz, CDCl<sub>3</sub>): δ 8.26 (d, *J* = 8 Hz, 1H), 7.37-7.15 (m, 7H), 6.99 (d, *J* = 12 Hz, 1H), 6.76 (d, *J* = 12 Hz, 1H), 2.06 (s, 3H).

**<sup>13</sup>C NMR** (100 MHz, CDCl<sub>3</sub>): δ 156.68, 154.89, 136.41, 135.63, 135.01, 134.78, 133.17, 129.75, 128.84, 128.61, 128.33, 125.89, 125.48, 121.85, 120.61, 120.47, 14.40.

**HRMS** [M + H]<sup>+</sup> calculated for C<sub>19</sub>H<sub>13</sub>BrN<sub>2</sub>O<sub>2</sub>: 381.0239, found: 381.0211

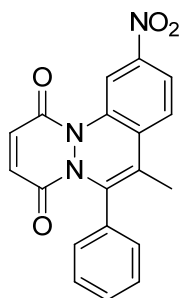

**7-methyl-10-nitro-6-phenylpyridazino[1,2-*a*]cinnoline-1,4-dione 5ia**

Red solid, Yield; 55.5 mg, 76%

**<sup>1</sup>H NMR** (400 MHz, CDCl<sub>3</sub>): δ 8.93 (s, 1H), 8.09 (d, *J* = 8 Hz, 1H), 7.47 (d, *J* = 8 Hz, 1H), 7.35-7.18 (m, 5H), 7.04 (d, *J* = 8 Hz, 1H), 6.80 (d, *J* = 8 Hz, 1H), 2.03 (s, 3H).

**<sup>13</sup>C NMR** (100 MHz, CDCl<sub>3</sub>): δ 156.61, 154.86, 146.79, 138.14, 136.02, 135.91, 134.92, 132.89, 132.59, 129.11, 128.76, 128.51, 124.77, 121.52, 119.41, 113.35, 14.51.

**HRMS** [M + H]<sup>+</sup> calculated for C<sub>19</sub>H<sub>13</sub>N<sub>3</sub>O<sub>4</sub>: 348.0984, found: 348.1011

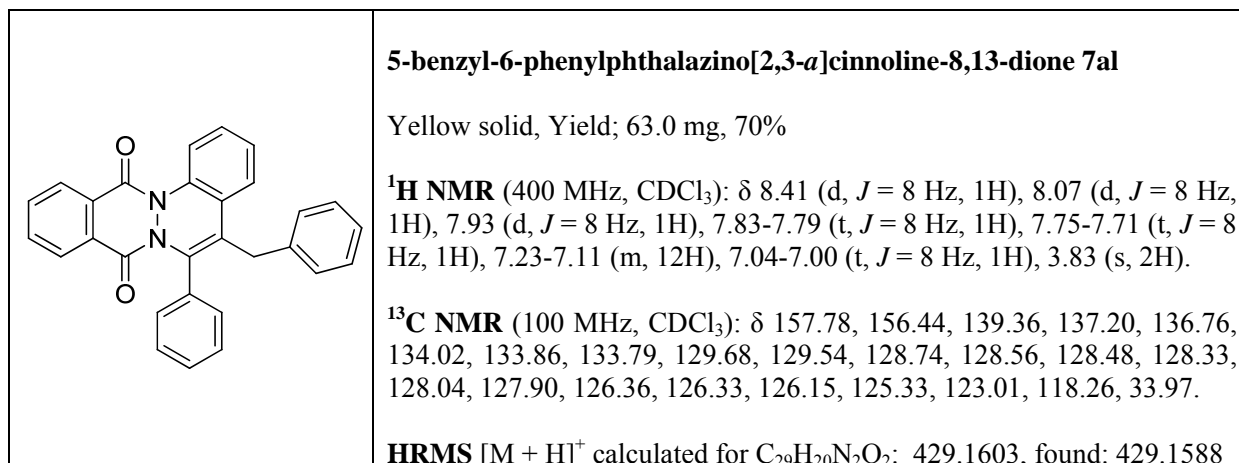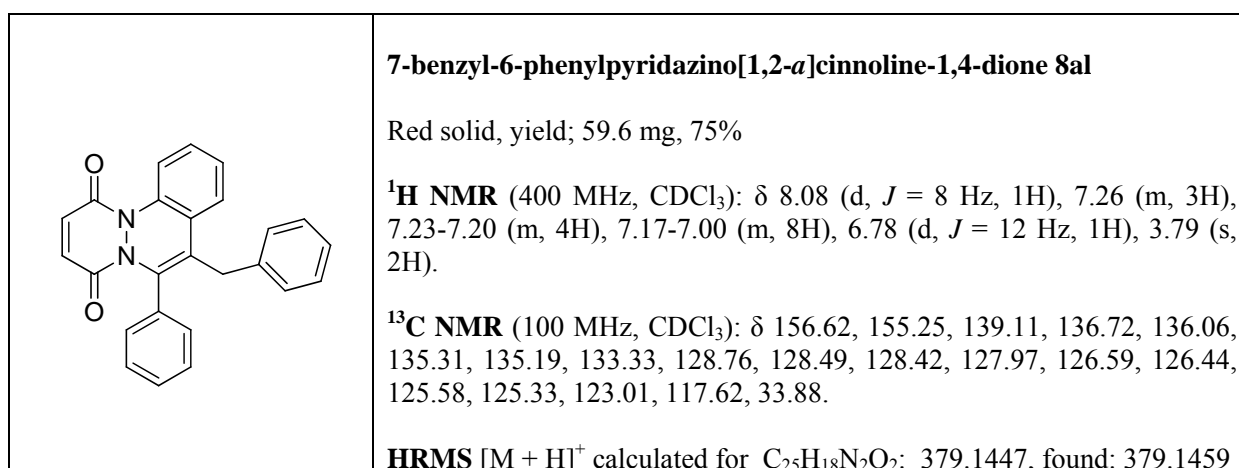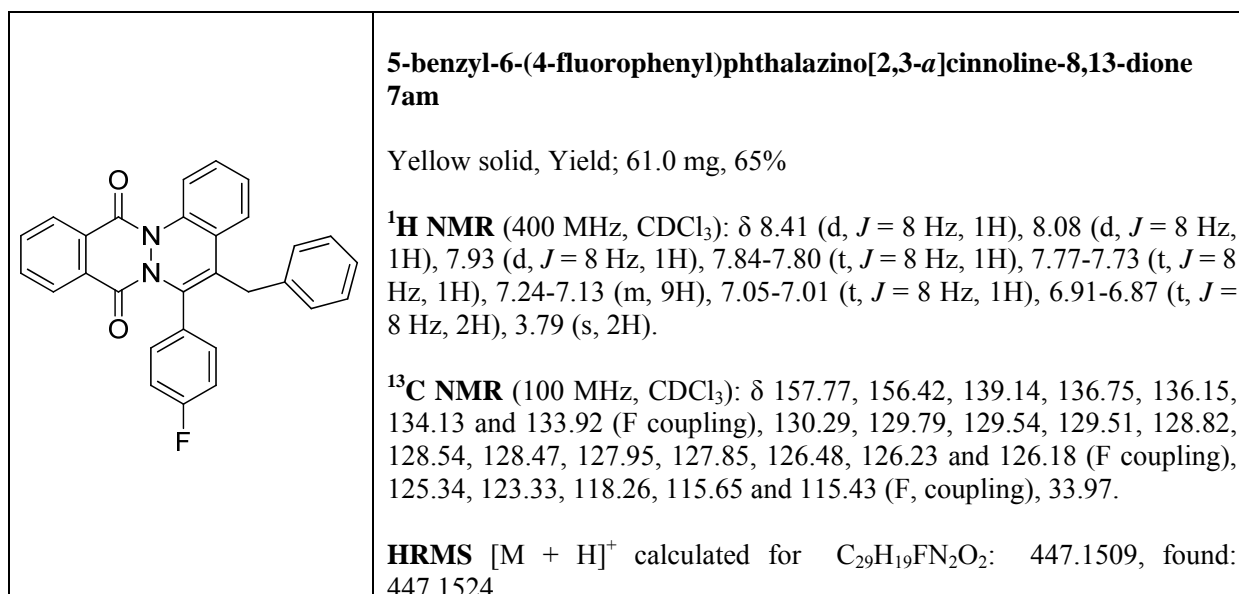

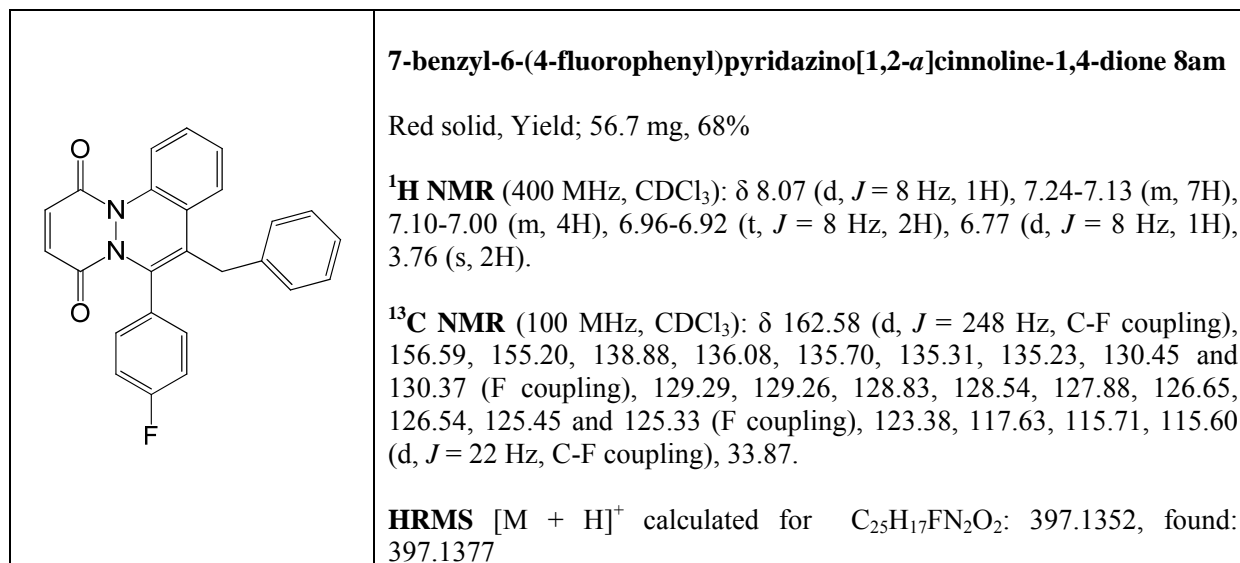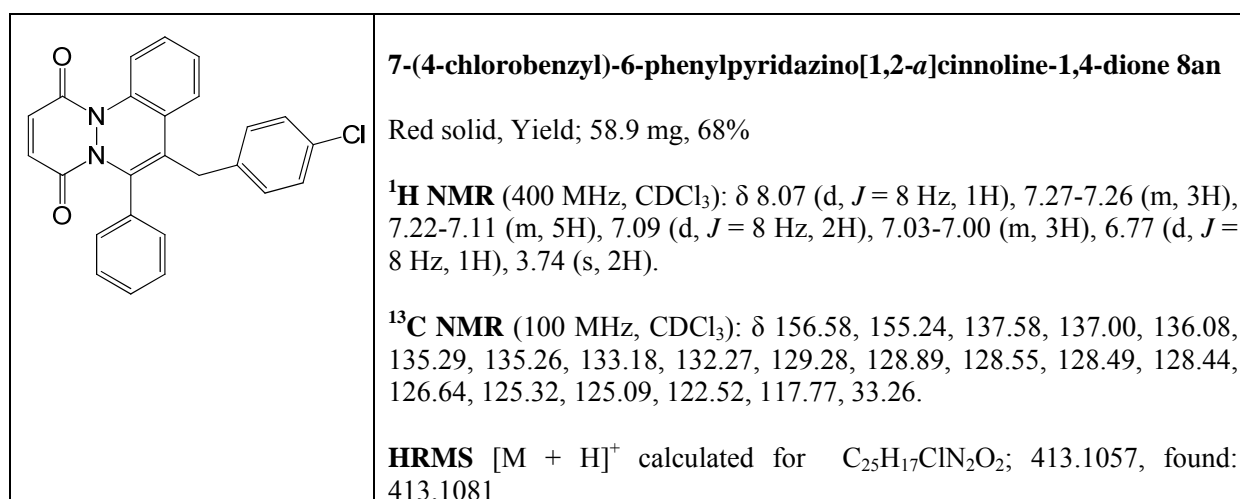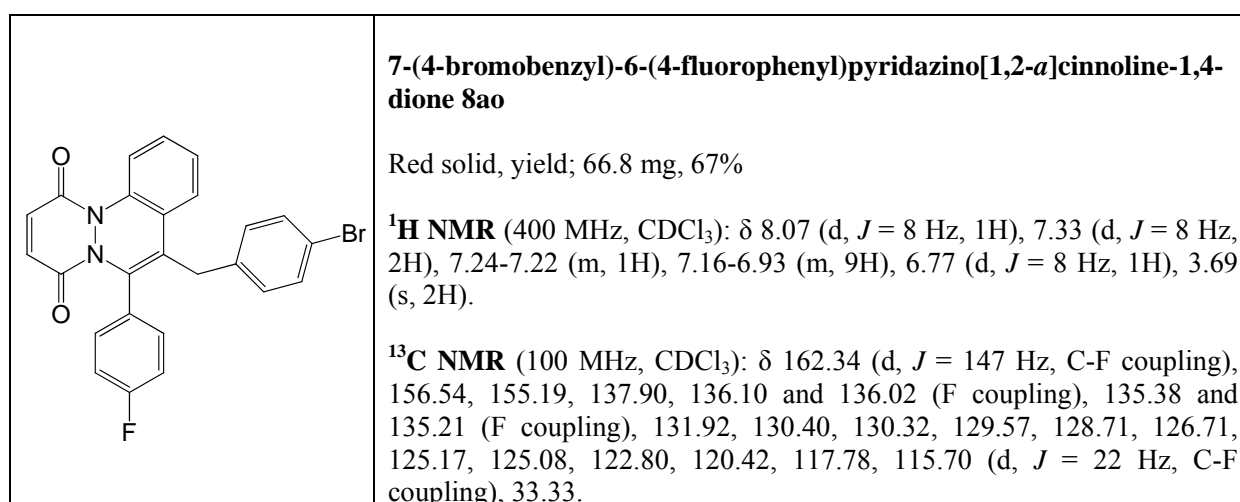

**HRMS**  $[M + H]^+$  calculated for  $C_{25}H_{16}BrFN_2O_2$ : 475.0457, found: 475.0481

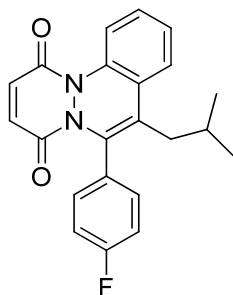

**6-(4-fluorophenyl)-7-isobutylpyridazino[1,2-a]cinnoline-1,4-dione 8ap**

Red solid, Yield; 58.6 mg, 77%

**$^1H$  NMR** (400 MHz,  $CDCl_3$ ):  $\delta$  8.06 (d,  $J = 8$  Hz, 1H), 7.36 (d,  $J = 8$  Hz, 1H), 7.27-7.22 (m, 2H), 7.16-7.13 (m, 2H), 7.02-6.96 (m, 3H), 6.72 (d,  $J = 12$  Hz, 1H), 2.37 (d, 8 Hz, 2H), 1.63-1.56 (m, 1H), 0.59 (d,  $J = 8$  Hz, 6H).

**$^{13}C$  NMR** (100 MHz,  $CDCl_3$ ):  $\delta$  162.36 (d,  $J = 241$  Hz, C-F coupling), 156.58, 154.87, 136.32, 135.46, 135.09 and 134.91 (F coupling), 131.42, 131.34, 129.33, 128.38, 126.60, 125.23 and 125.14 (F coupling), 124.59, 117.89, 115.48 (d,  $J = 22$  Hz, C-F coupling), 35.41, 27.36, 22.21.

**HRMS**  $[M + H]^+$  calculated for  $C_{22}H_{19}FN_2O_2$ : 363.1509, found: 363.1488

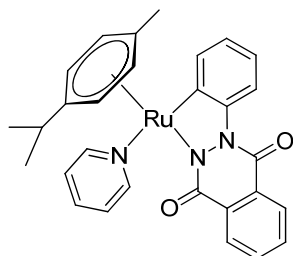

**Cycloruthenated complex 1cr**

Orange yellow solid, yield; 68%

**$^1H$  NMR** (400 MHz,  $CDCl_3$ ):  $\delta$  8.81 (d,  $J = 8$  Hz, 2H), 8.61 (d,  $J = 8$  Hz, 1H), 8.29 (d,  $J = 8$  Hz, 2H), 8.04 (d,  $J = 8$  Hz, 1H), 7.69-7.65 (t,  $J = 8$  Hz, 1H), 7.60-7.57 (t,  $J = 6$  Hz, 1H), 7.44-7.41 (t,  $J = 6$  Hz, 1H), 7.00-6.95 (m, 4H), 6.01 (d,  $J = 8$  Hz, 1H), 5.88 (d,  $J = 8$  Hz, 1H), 5.66 (d,  $J = 8$  Hz, 1H), 4.80 (d,  $J = 8$  Hz, 1H), 2.10-2.06 (m, 1H), 1.46 (s, 3H), 0.80 (d,  $J = 8$  Hz, 3H), 0.73 (d,  $J = 8$  Hz, 3H).

**$^{13}C$  NMR** (100 MHz,  $CDCl_3$ ):  $\delta$  162.74, 160.24, 159.06, 154.87, 148.89, 138.15, 136.61, 132.13, 130.79, 130.02, 128.98, 128.83, 127.05, 126.39, 124.68, 124.39, 123.56, 118.93, 104.08, 97.73, 94.12, 94.04, 89.63, 79.68, 30.87, 22.95, 22.13, 18.00.

**ESI-MS**  $m/z$  calculated for  $C_{29}H_{28}N_3O_2Ru$   $[M + H]^+$ : 552.1225, found: 552.1060.  $m/z$  calculated for  $C_{29}H_{28}N_3O_2Ru$   $[(M + H) - Pyridine]^+$ : 473.0803, found: 473.0637

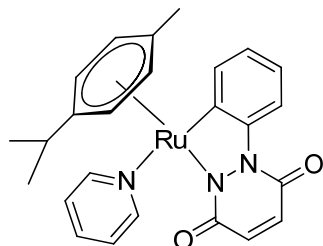

### Cycloruthenated complex 4cr

Orange yellow solid, yield; 73%

**<sup>1</sup>H NMR** (400 MHz, CDCl<sub>3</sub>): δ 8.74 (d, *J* = 4 Hz, 2H), 8.60 (d, *J* = 8 Hz, 1H), 8.01 (d, *J* = 8 Hz, 1H), 7.48-7.45 (t, *J* = 8 Hz, 1H), 7.01-6.98 (m, 3H), 6.95-6.92 (t, *J* = 8 Hz, 1H), 6.77 (d, *J* = 8 Hz, 1H), 6.61 (d, *J* = 8 Hz, 1H), 5.91 (d, *J* = 5.7 Hz, 1H), 5.84 (d, *J* = 6.4 Hz, 1H), 5.63 (d, *J* = 5.6 Hz, 1H), 4.81 (d, *J* = 5.6 Hz, 1H), 2.11-2.03 (m, 1H), 1.45 (s, 3H), 0.83 (d, *J* = 8 Hz, 3H), 0.77 (d, *J* = 8 Hz, 3H).

**<sup>13</sup>C NMR** (100 MHz, CDCl<sub>3</sub>): δ 163.69, 160.38, 159.37, 154.89, 149.00, 138.15, 136.74, 132.52, 131.74, 125.16, 124.44, 123.60, 118.52, 103.92, 98.56, 94.12, 94.05, 89.78, 79.99, 30.83, 22.89, 22.03, 17.76.

**ESI-MS** *m/z* calculated for C<sub>25</sub>H<sub>25</sub>N<sub>3</sub>O<sub>2</sub>Ru [M + H]<sup>+</sup>: 502.1069, found: 502.0994 *m/z* calculated for C<sub>25</sub>H<sub>25</sub>N<sub>3</sub>O<sub>2</sub>Ru [(M + H) - Pyridine]<sup>+</sup>: 423.0647, found: 423.0581.



# <sup>1</sup>H NMR and <sup>13</sup>C NMR of **3aa**

Signature SIF VIT VELLORE  
PROP-OL-PH-PTHA

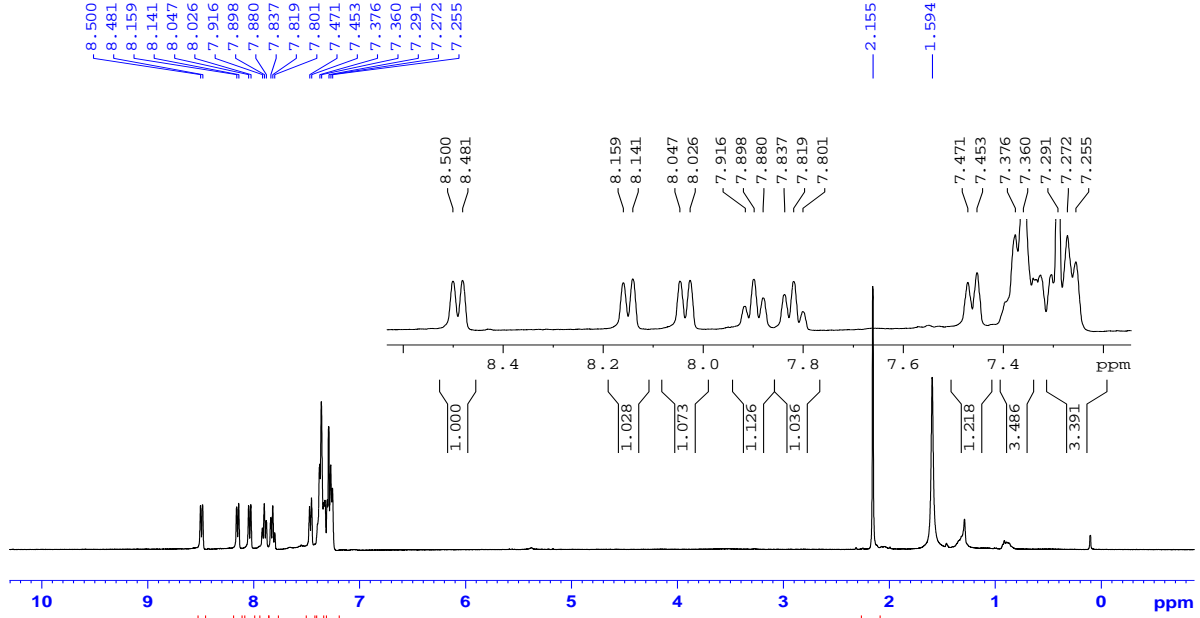

Signature SIF VIT VELLORE  
PROP-DL-PH-PTHA

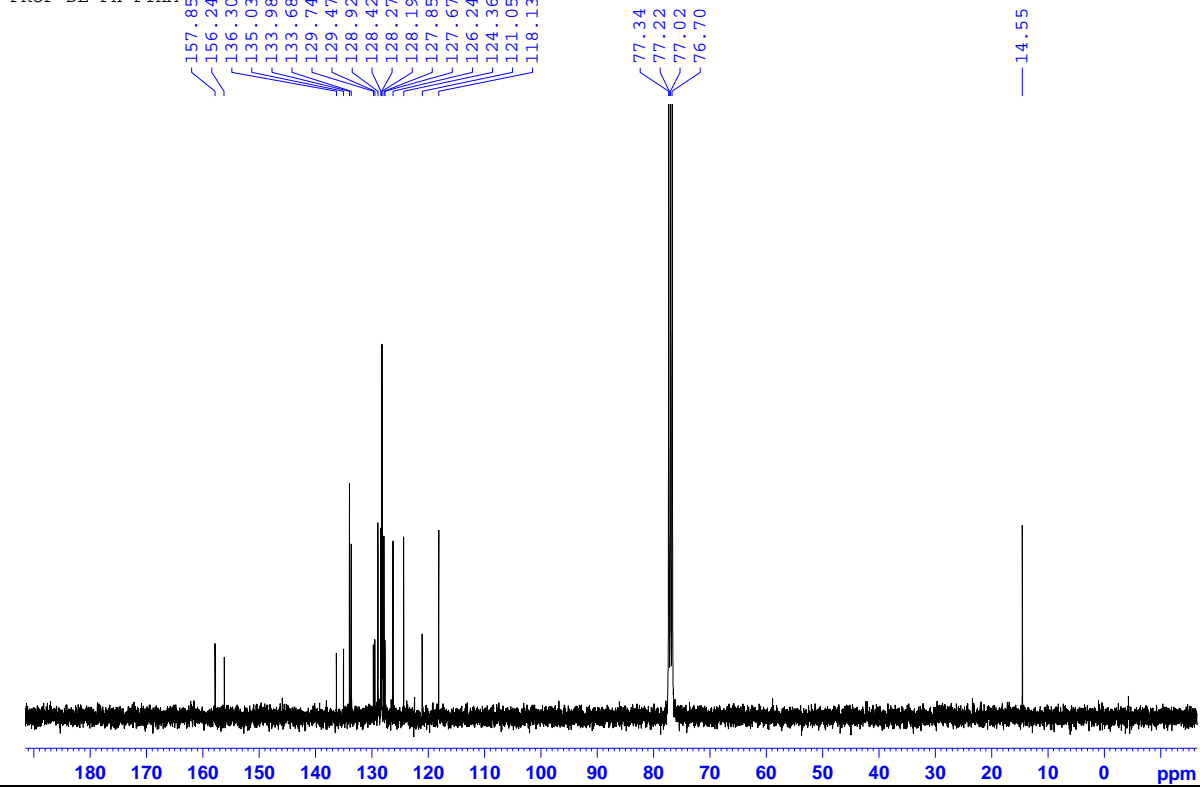

# <sup>1</sup>H NMR and <sup>13</sup>C NMR of 3ab

Signature SIF VIT VELLORE  
4TBU-PROPOL

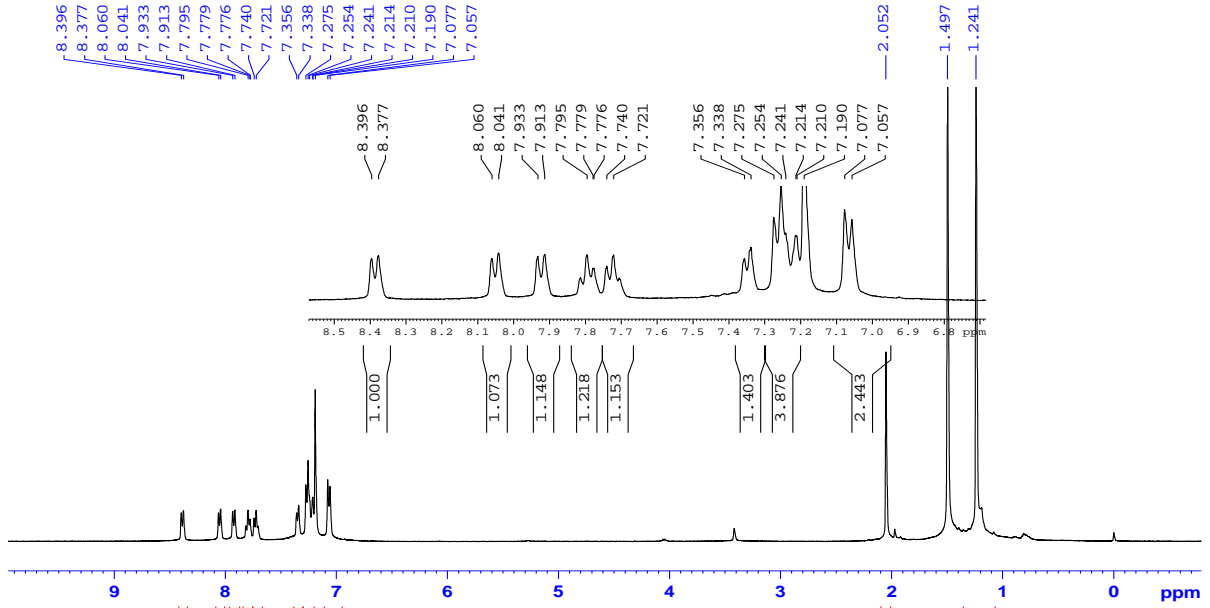

Signature SIF VIT VELLORE  
4TBU-PROP-CL

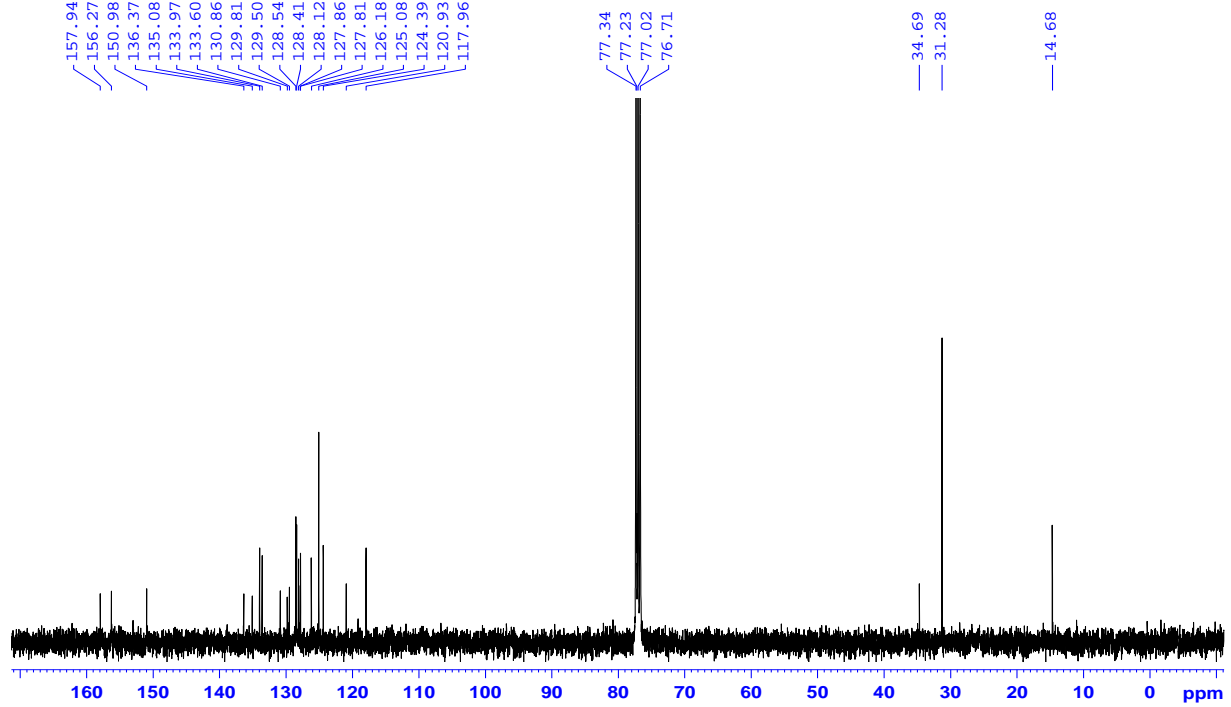

# <sup>1</sup>H NMR and <sup>13</sup>C NMR of 3ac

Signature SIF VIT VELLORE  
PH-PTHA-4MEO-PROP-OL

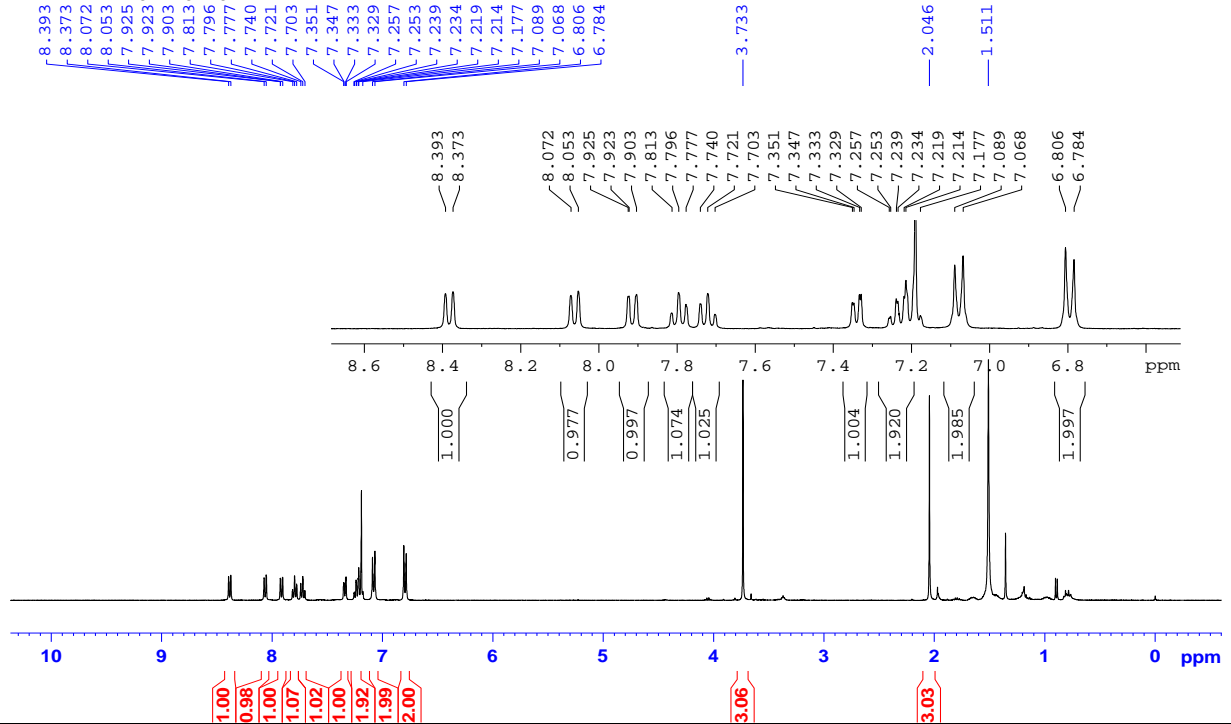

Signature SIF VIT VELLORE  
PH-PTHA-4MEO-PROP-OL

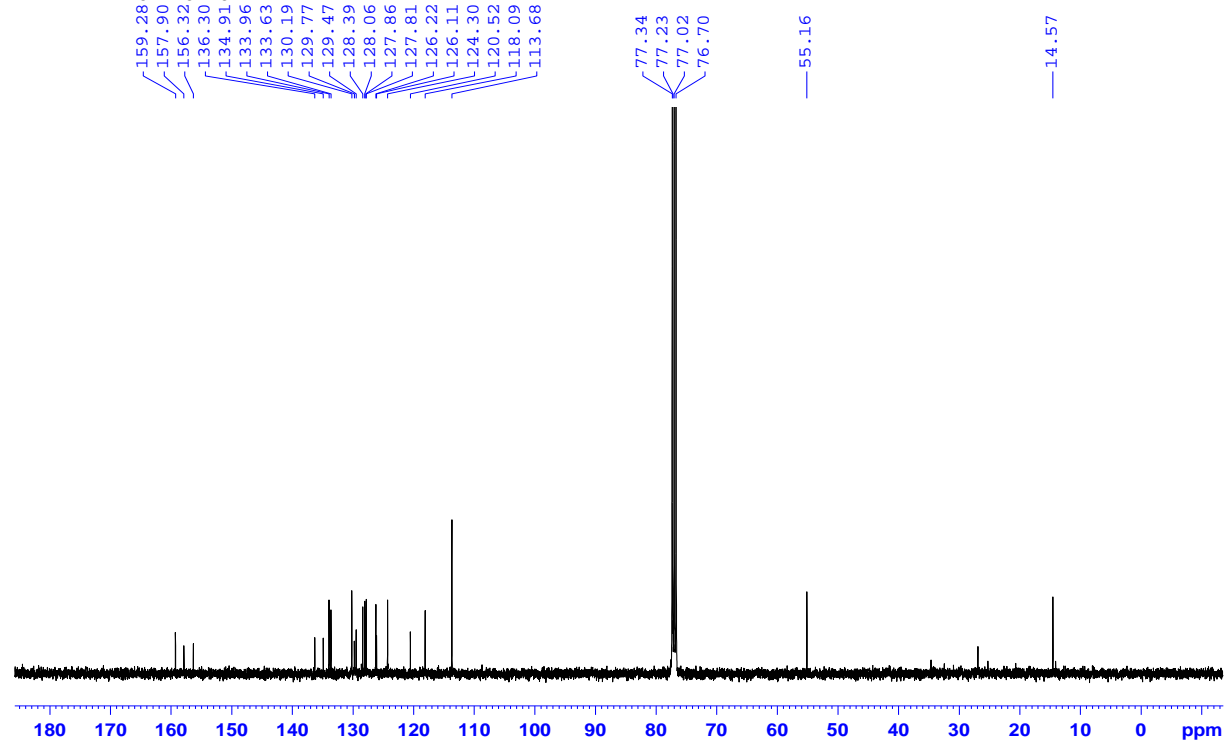

# <sup>1</sup>H NMR and <sup>13</sup>C NMR of 3ad

Signature SIF VIT VELLORE  
PH-PTHA-4F-PHE-PROP-OL

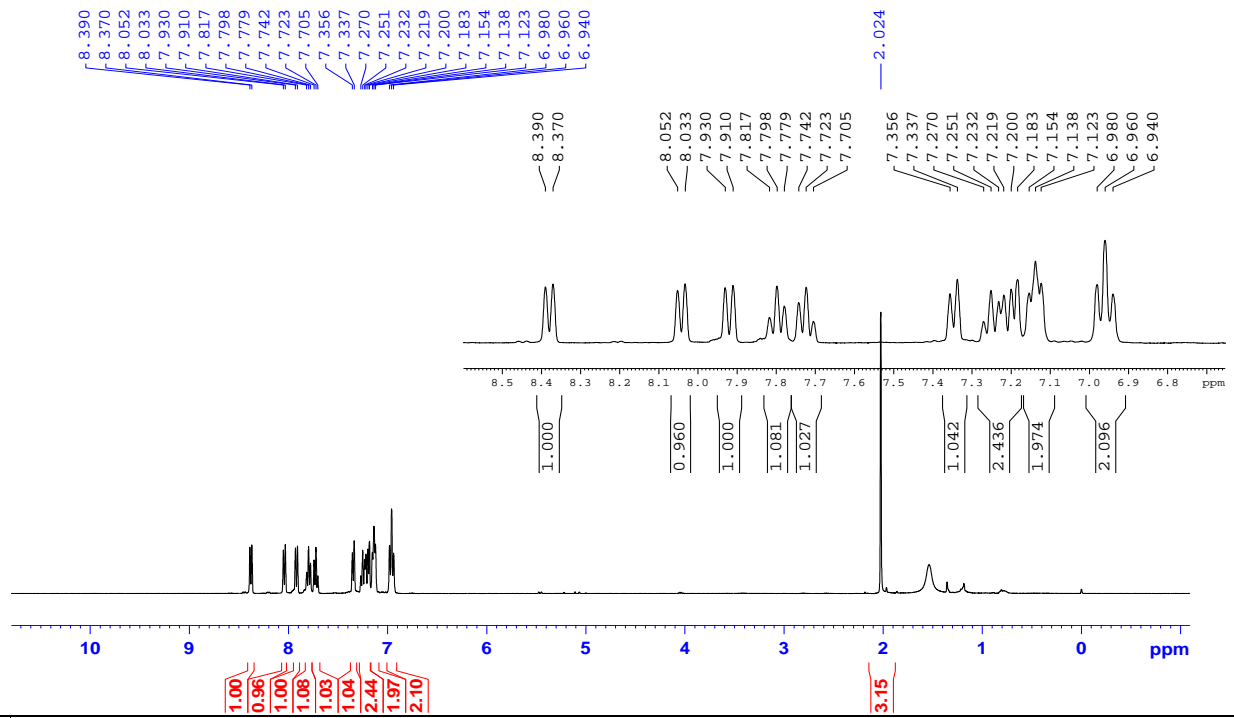

Signature SIF VIT VELLORE  
PH-PTHA-4F-PHE-PROP-OL

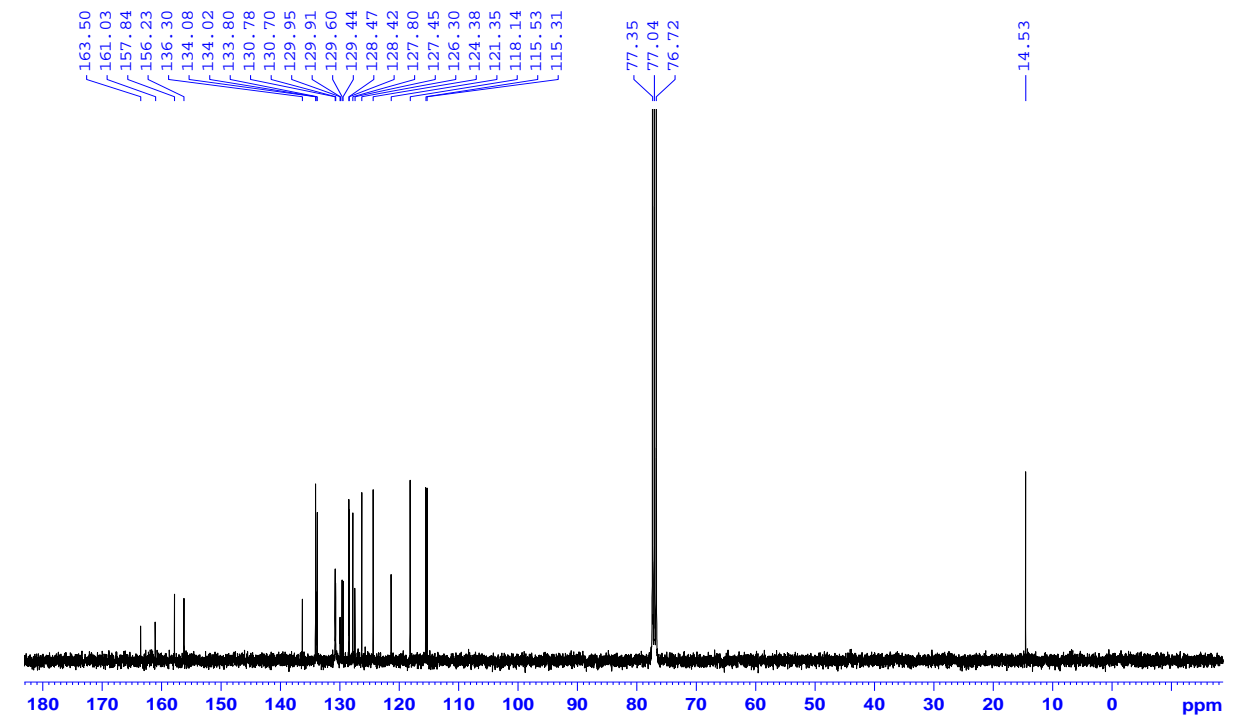

$^{19}\text{F}$  NMR of **3ad**

Signature SIF VIT VELLORE  
PH-PTHA-4F-PHE-PROP-OL

-112.41  
-112.42  
-112.44  
-112.44

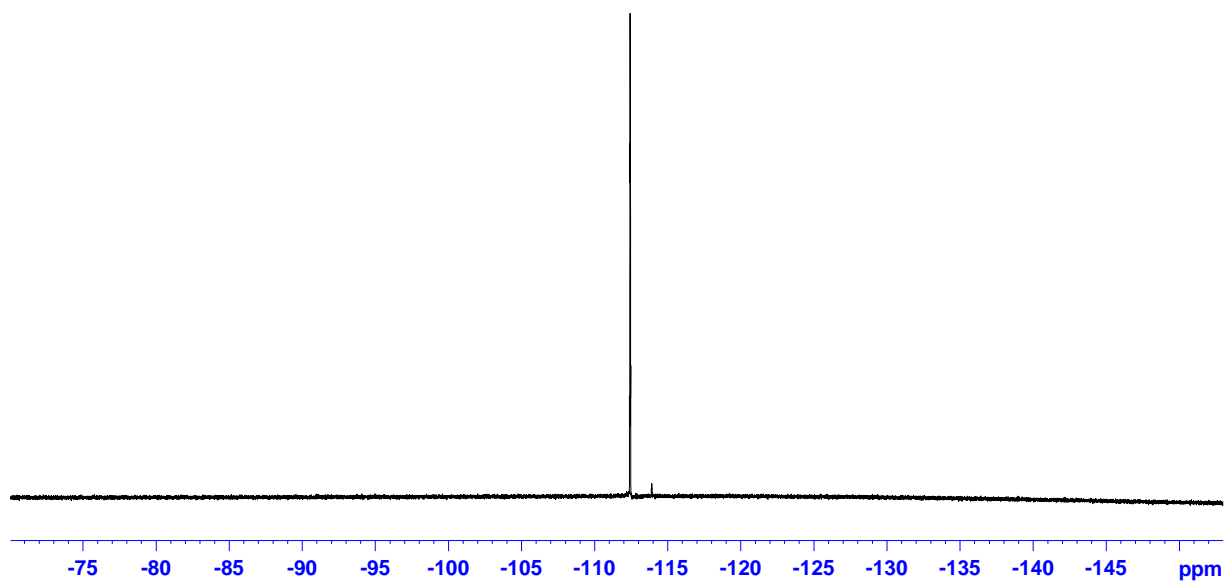

# <sup>1</sup>H NMR and <sup>13</sup>C NMR of 3ae

Signature SIF VIT VELLORE  
4-NO2-OL-PH-PTHA

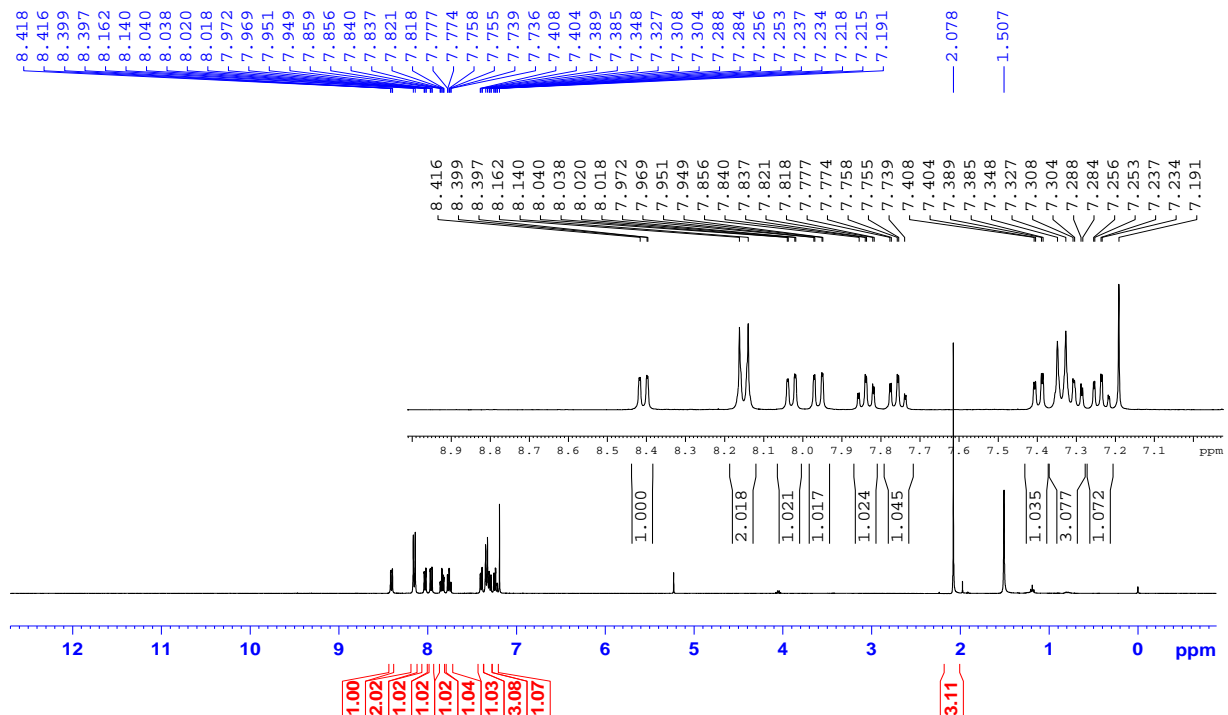

Signature SIF VIT VELLORE  
4NO-2-OL-PH-PTHA

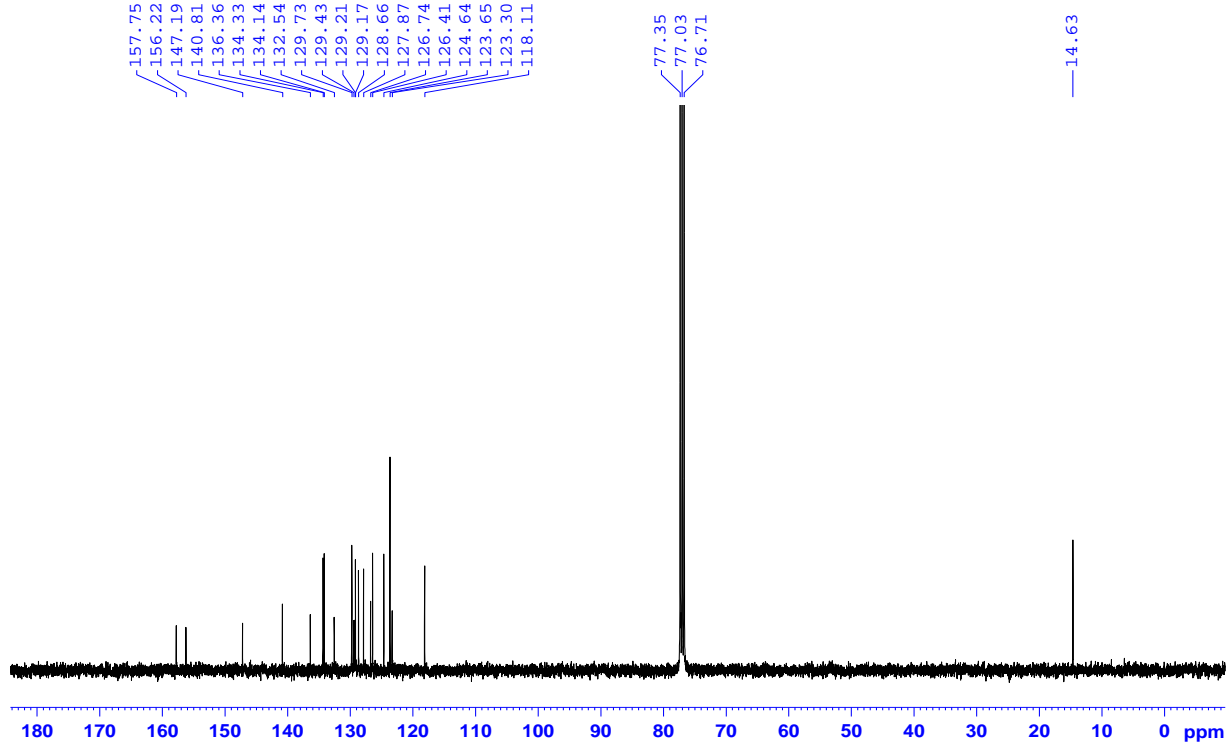

# <sup>1</sup>H NMR and <sup>13</sup>C NMR of 3af

Signature SIF VIT VELLORE  
PH-PTHA-3F-PROP-OL

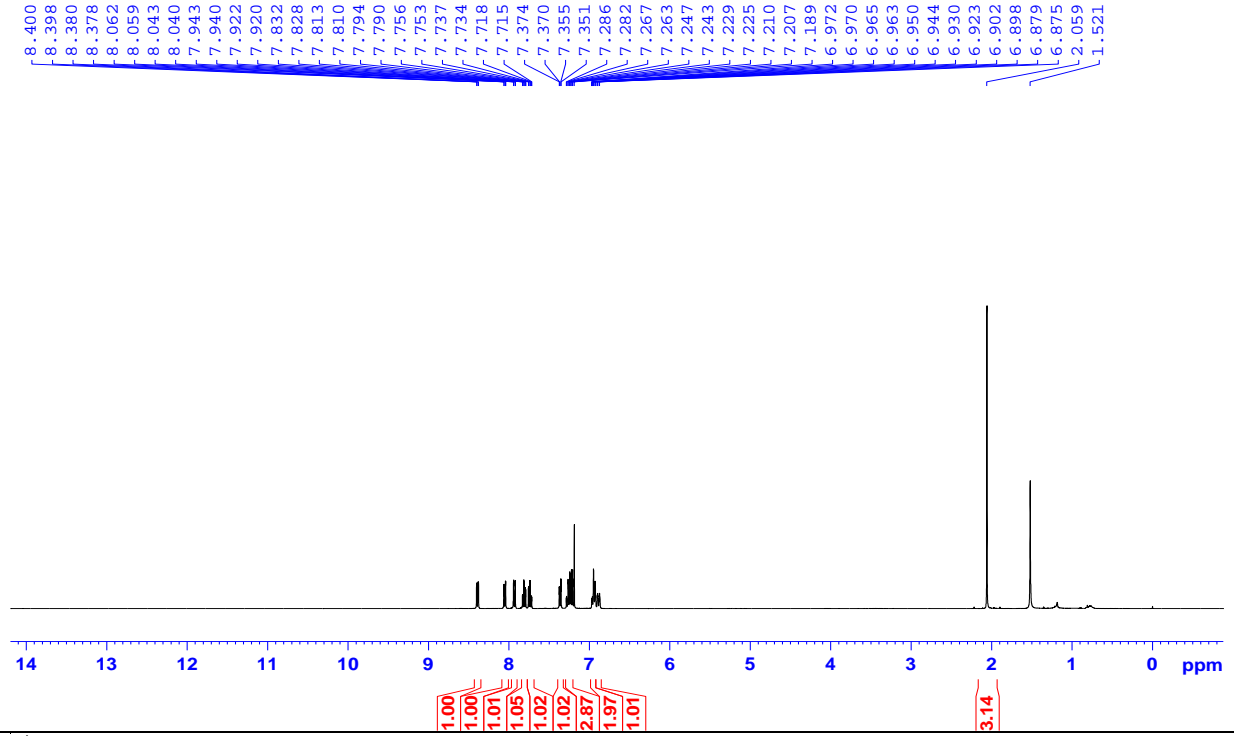

Signature SIF VIT VELLORE  
PH-PTHA-3F-PROP-OL

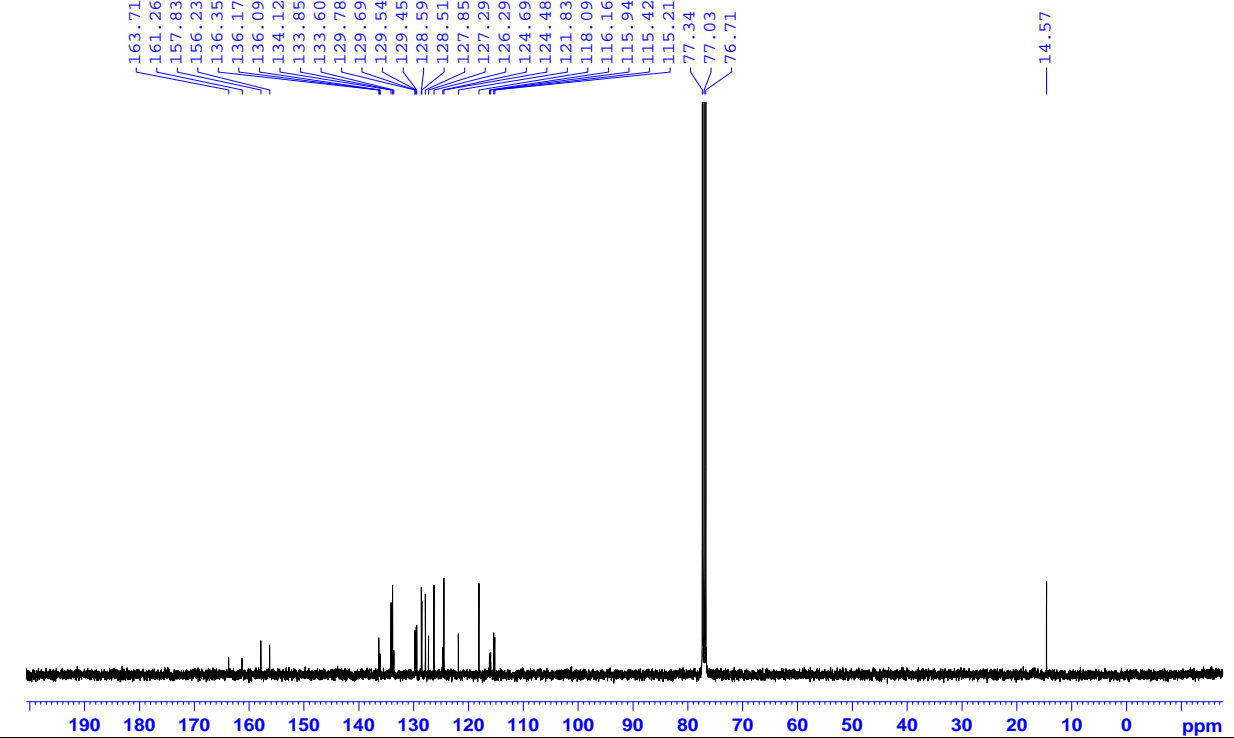

<sup>19</sup>F NMR of **3af**

Signature SIF VIT VELLORE  
PH-PTHA-3F-PROP-OL

-112.77  
-112.78  
-112.79  
-112.81  
-112.81  
-112.83

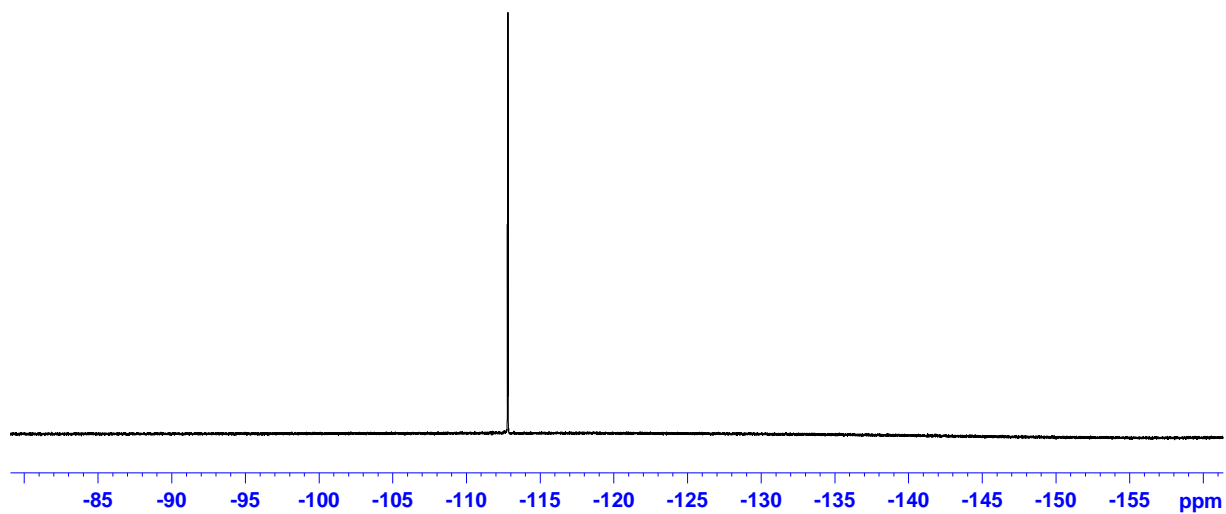



# <sup>1</sup>H NMR and <sup>13</sup>C NMR of 3ag

Signature SIF VIT VELLORE  
PH-PTHA-3ACE-PROP-OL

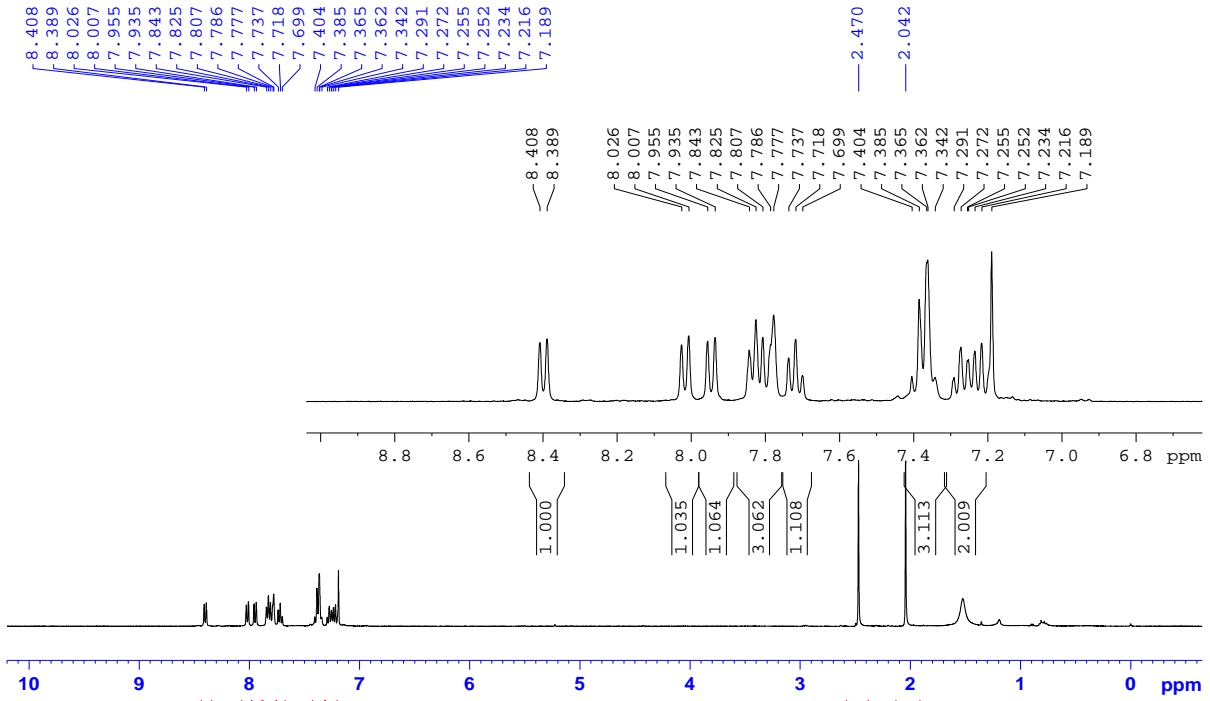

Signature SIF VIT VELLORE  
PH-PTHA-3ACE-PROP-OL

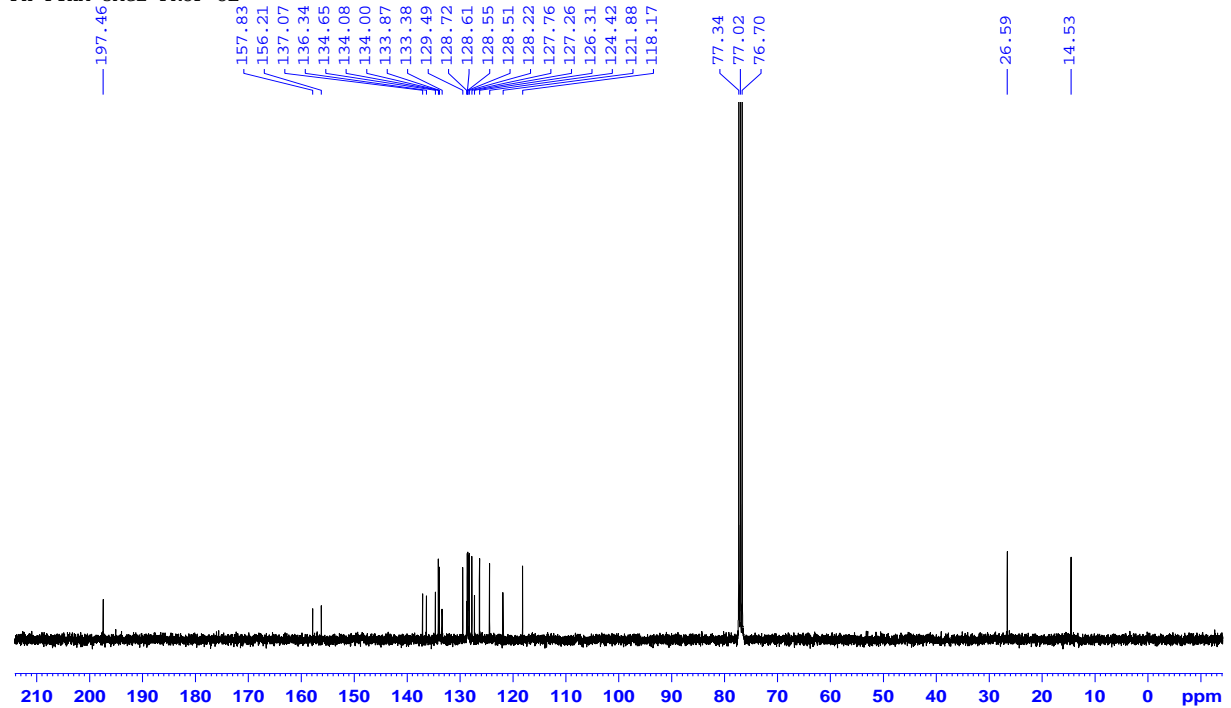

# <sup>1</sup>H NMR and <sup>13</sup>C NMR of 3ah

Signature SIF VIT VELLORE  
PH-PTHA-2,3-DI-F-PROP-OL

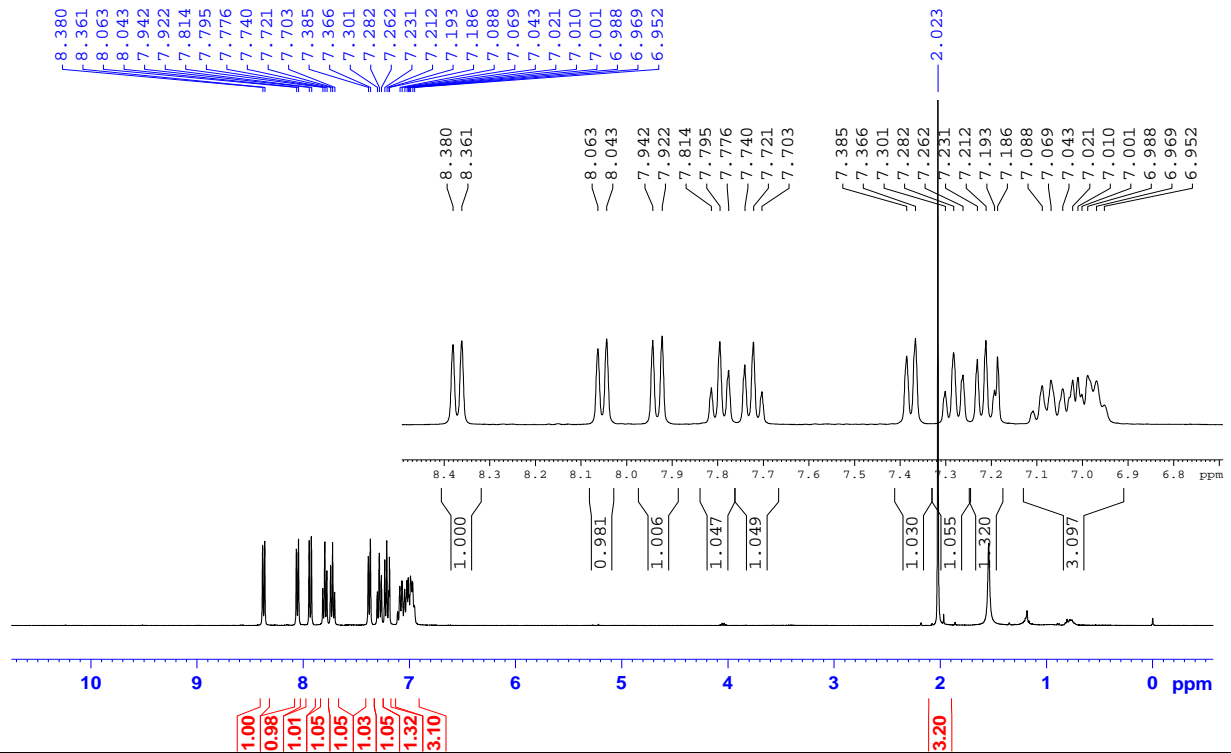

Signature SIF VIT VELLORE  
PH-PTHA-2,3-DI-F-PROP-OL

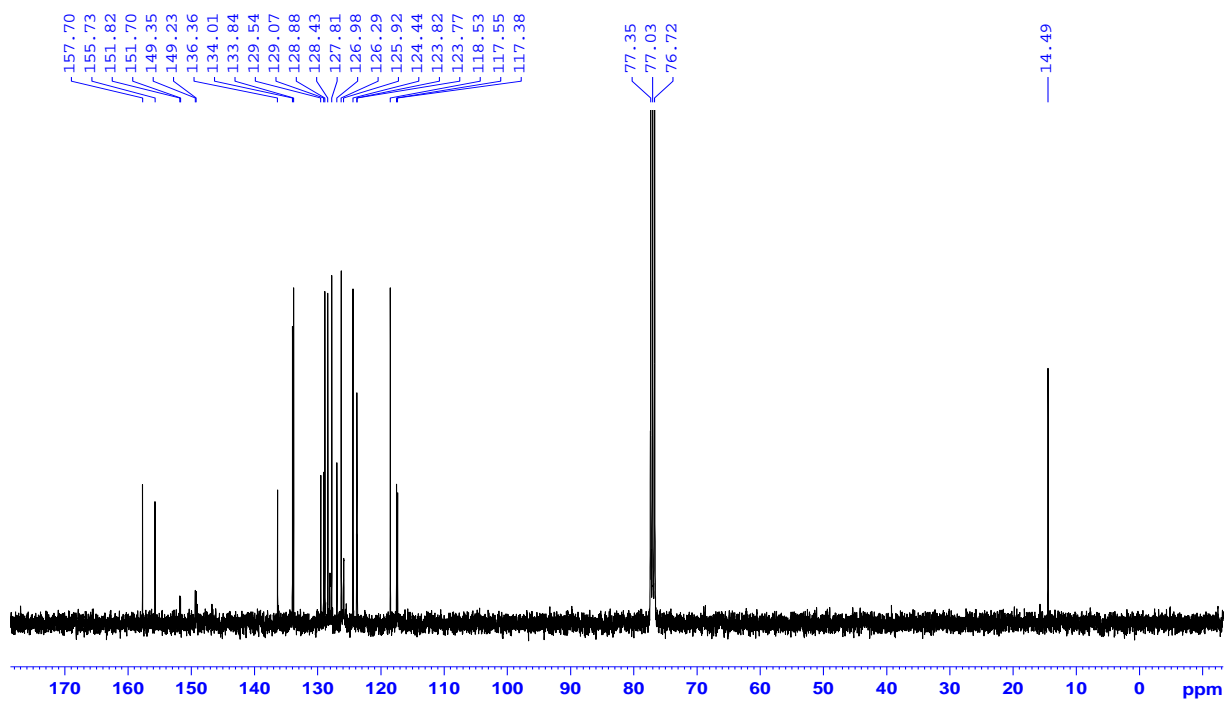

$^{19}\text{F}$  NMR of **3ah**

Signature SIF VIT VELLORE  
PH-PHTA-2,3-DI-F-PROP-OL

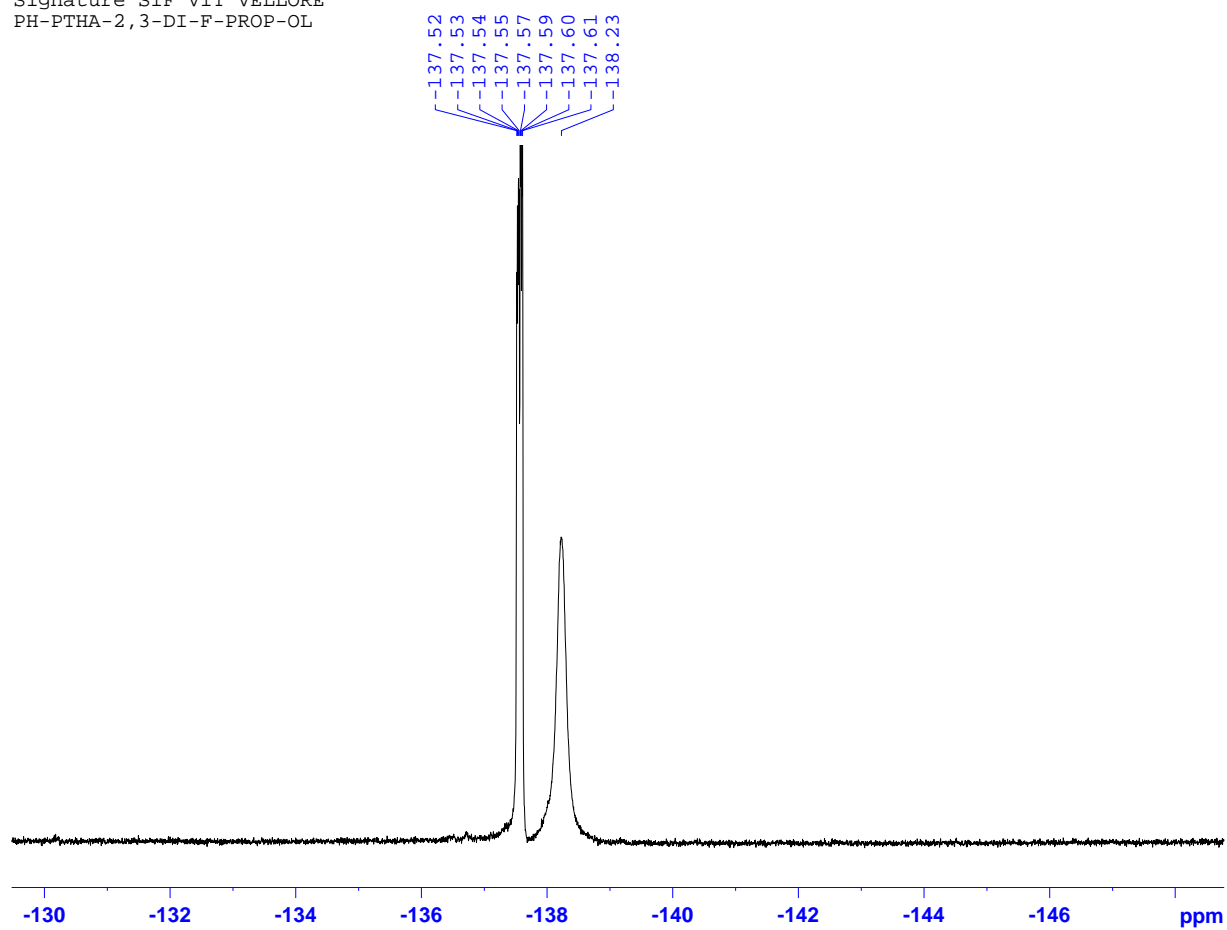



# <sup>1</sup>H NMR and <sup>13</sup>C NMR of 3aj

Signature SIF VIT VELLORE  
NAP-PROP-OL-PH-PTHA

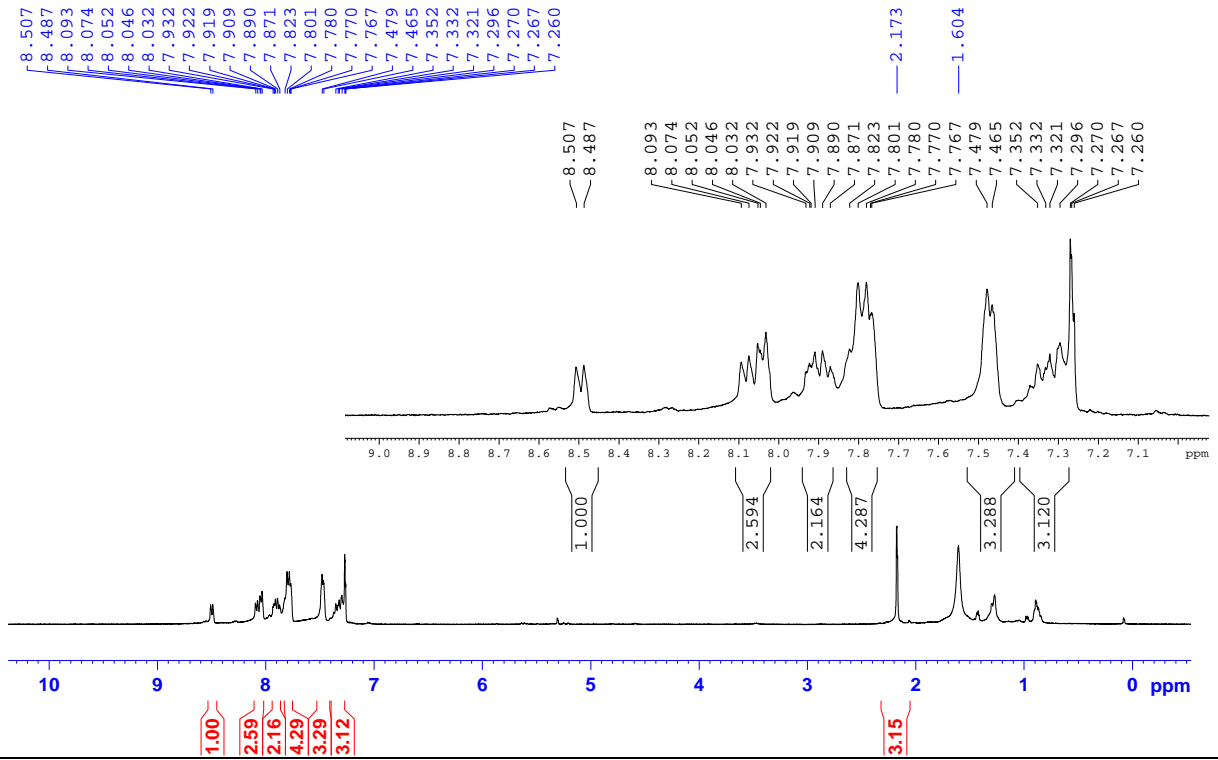

Signature SIF VIT VELLORE  
NAP-PROP-OL-PH-PTHA

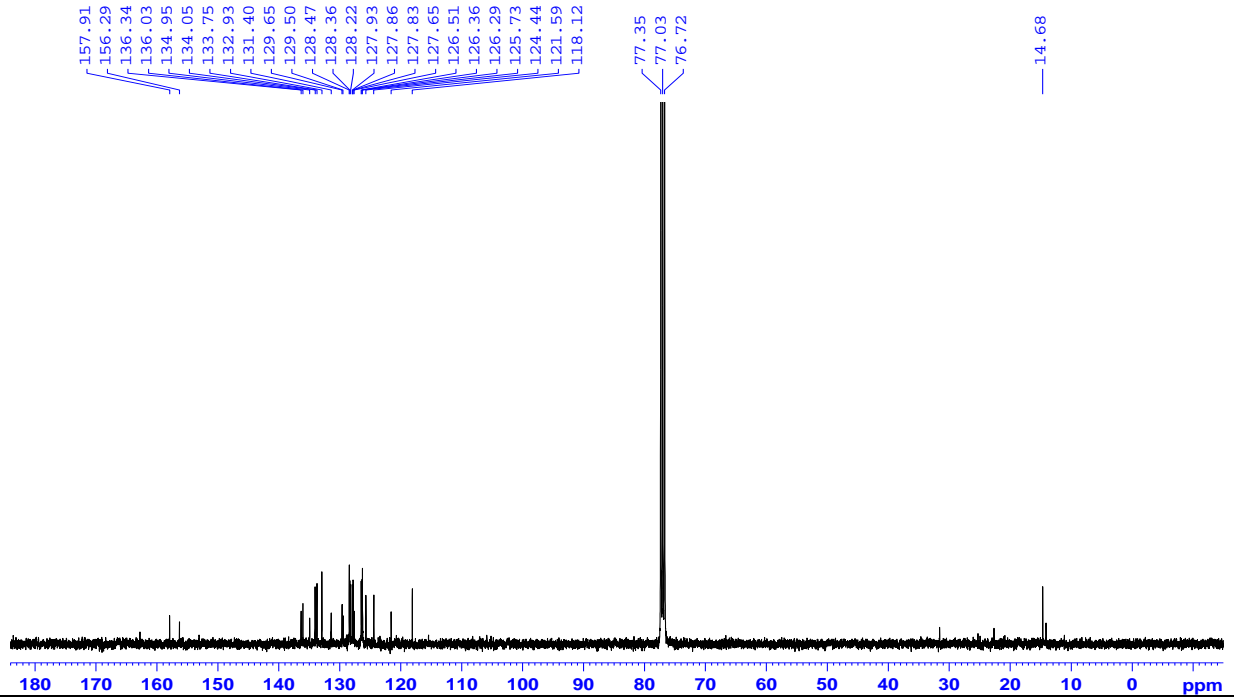

# <sup>1</sup>H NMR and <sup>13</sup>C NMR of 3ak

Signature SIF VIT VELLORE  
PH-PTHA-BIPHE-PROP-OL

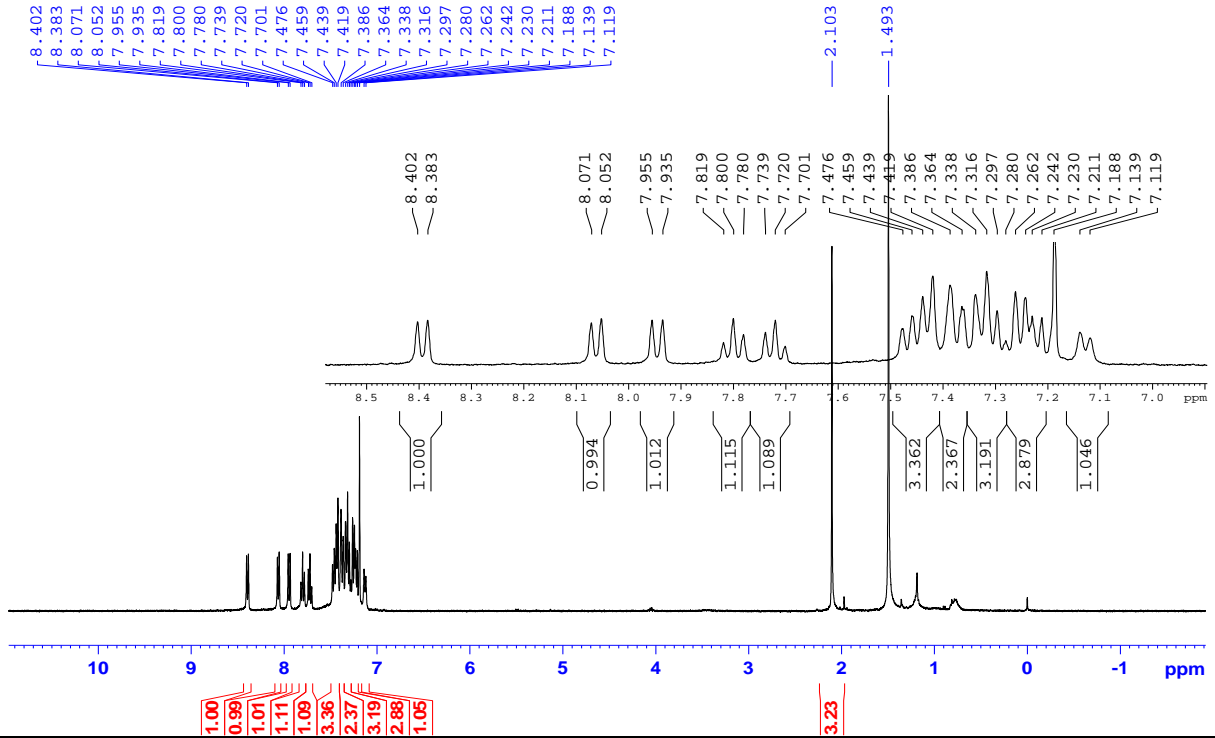

Signature SIF VIT VELLORE  
PH-PTHA-BIPHE-PROP-OL

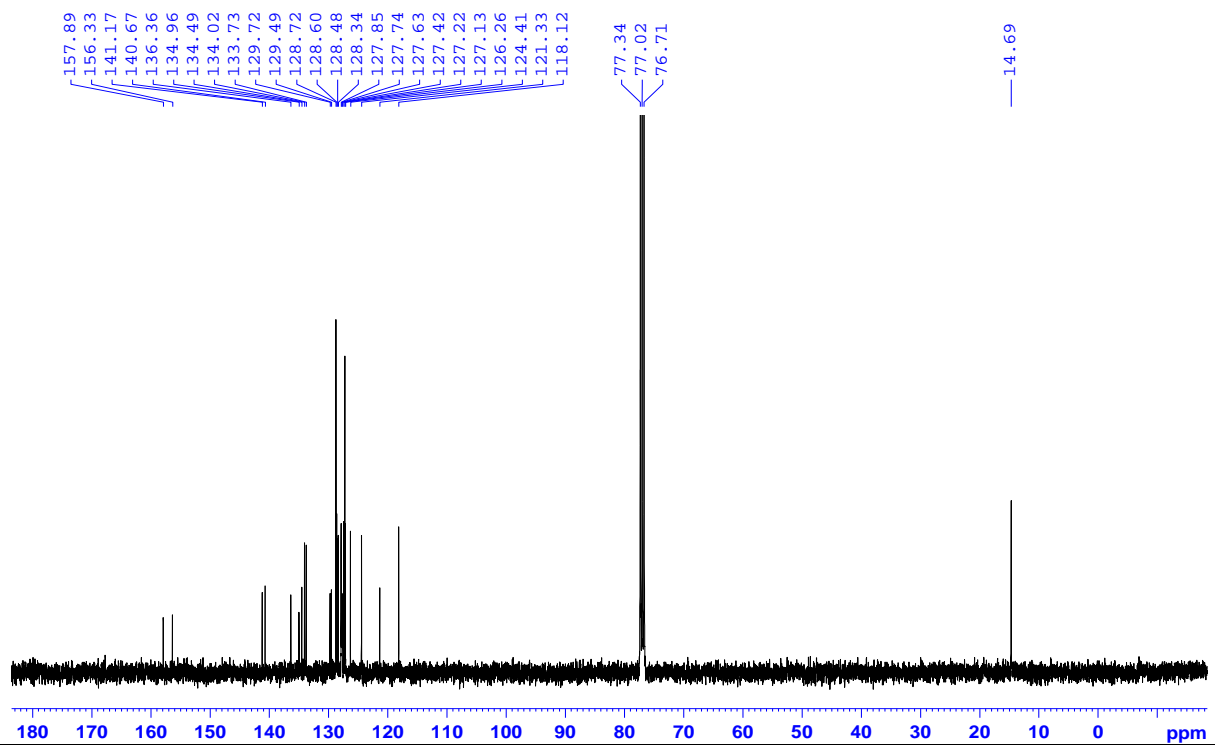

# <sup>1</sup>H NMR and <sup>13</sup>C NMR of 3al

Signature SIF VIT VELLORE  
PH-PTHA-A5N2POH

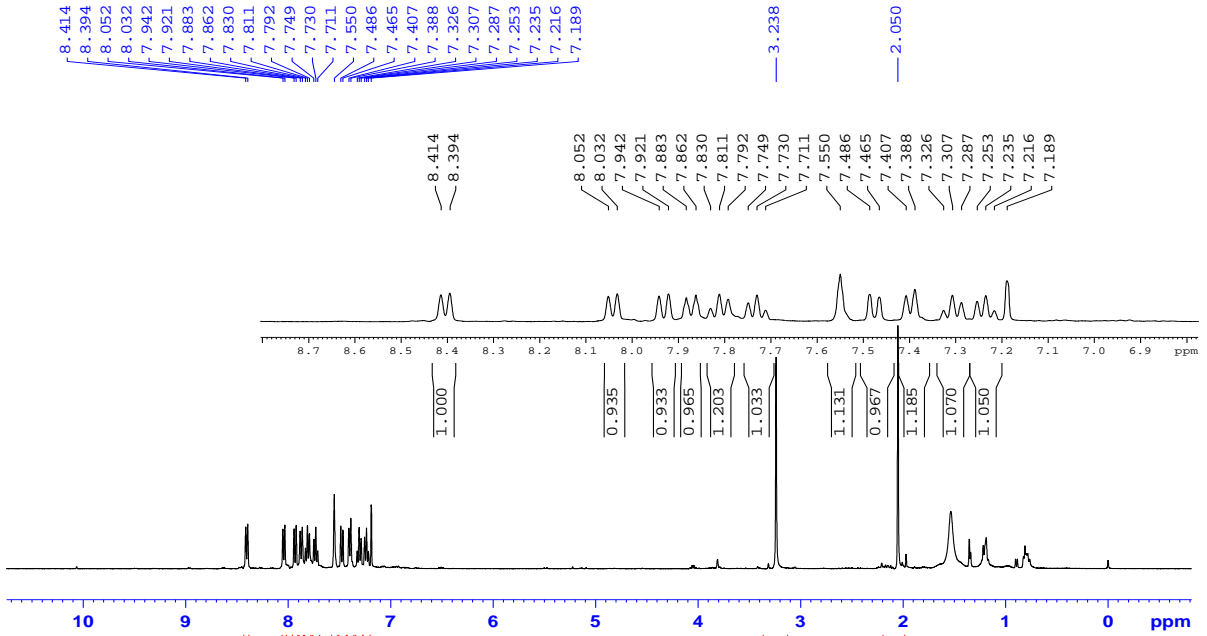

Signature SIF VIT VELLORE  
PH-PTHA-A5N2POH

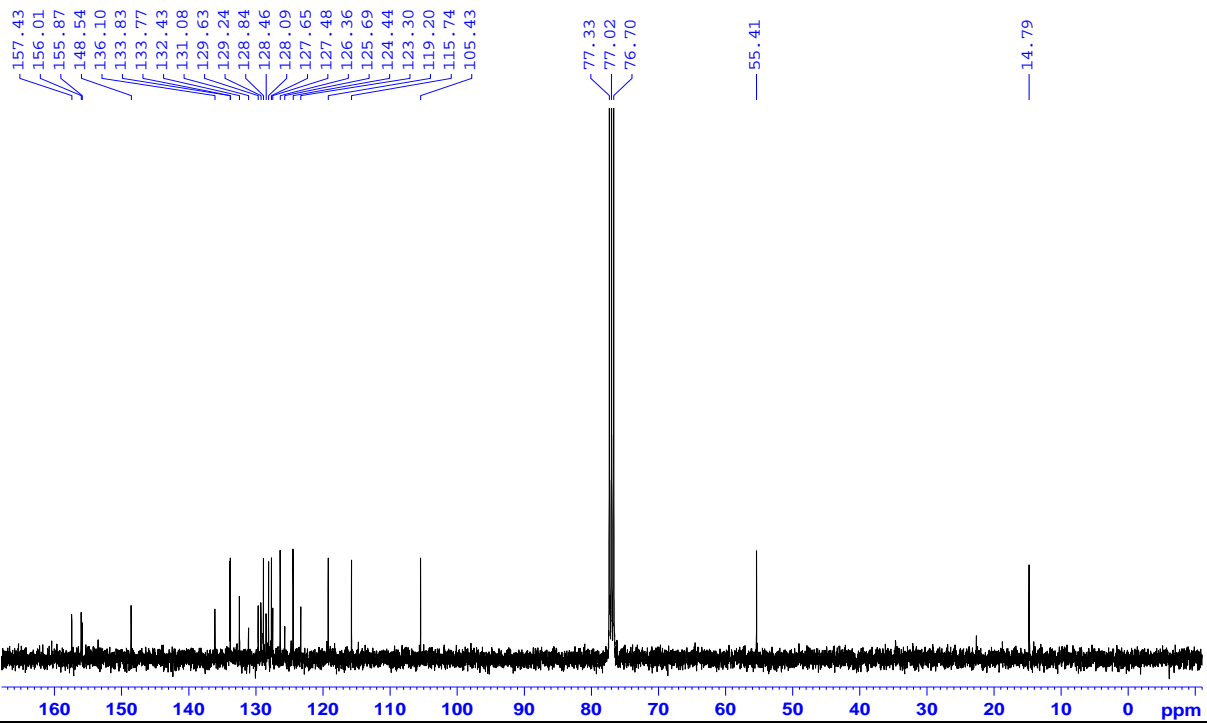

# <sup>1</sup>H NMR and <sup>13</sup>C NMR of 3ba

Signature SIF VIT VELLORE  
4ME-PH-PHTHA-PROP-OL

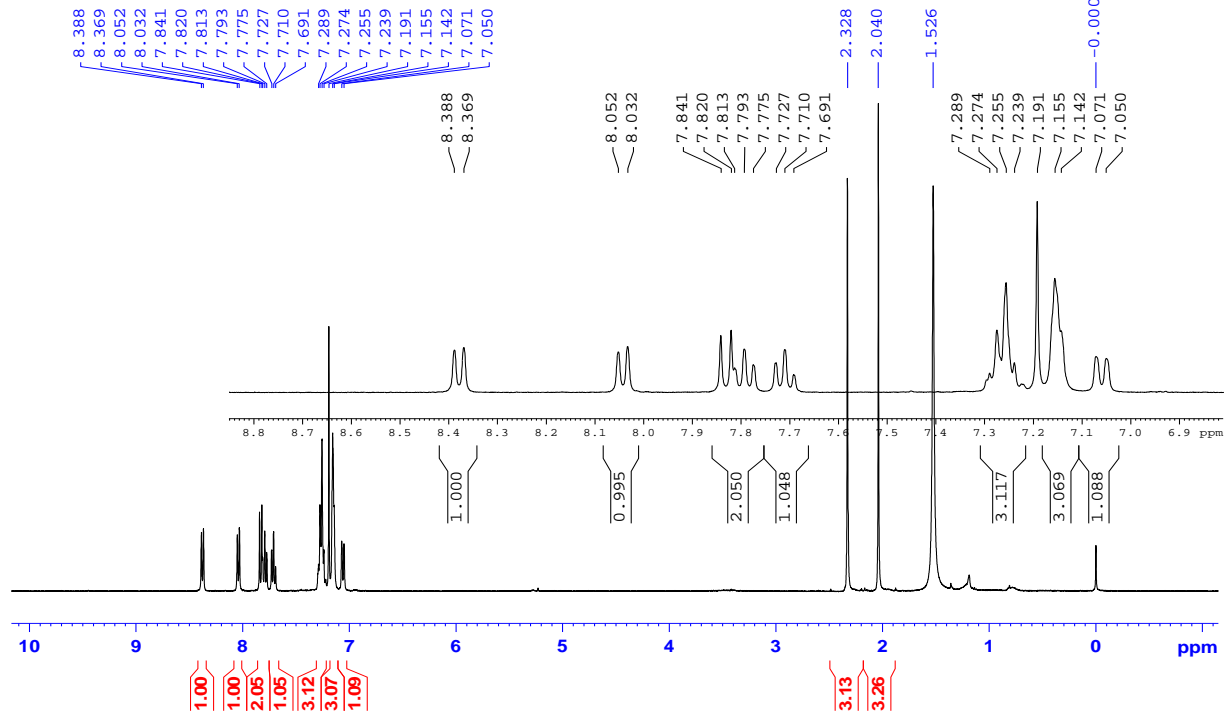

Signature SIF VIT VELLORE  
4MEPH-PH-PROP-OL

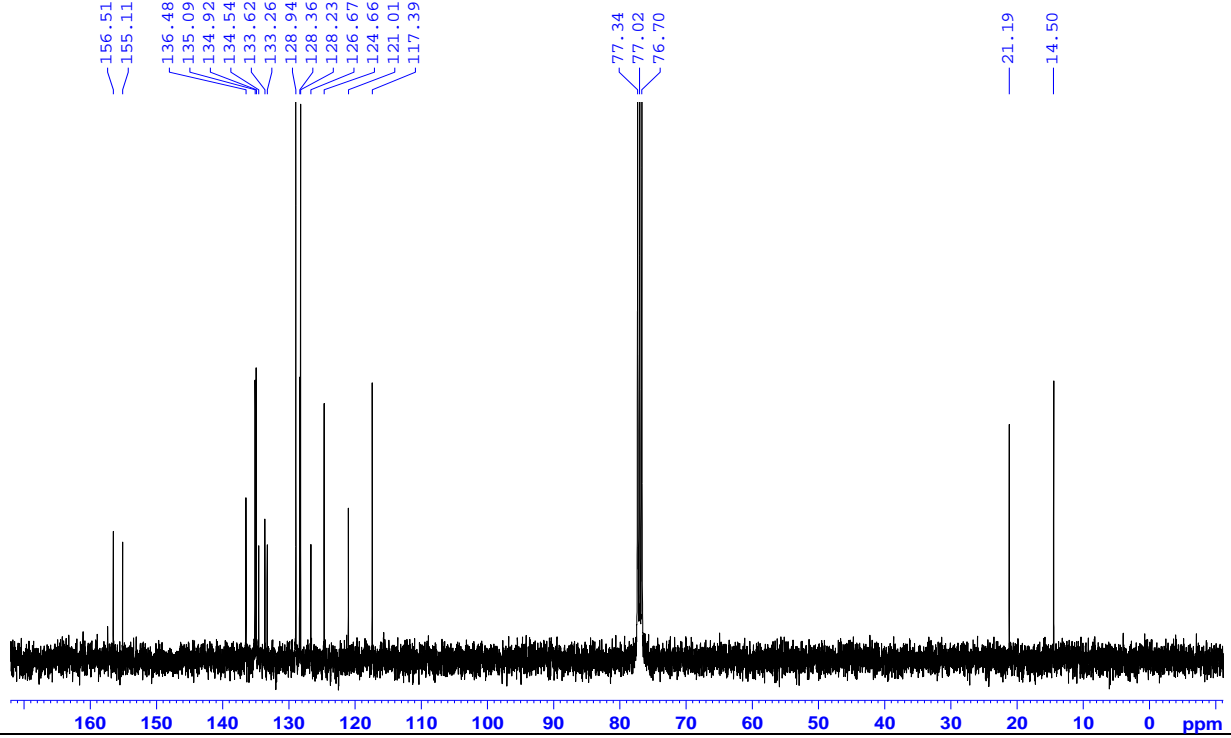



# <sup>1</sup>H NMR and <sup>13</sup>C NMR of 3bj

Signature SIF VIT VELLORE  
4ME-PH-PTHA-NAP-OL

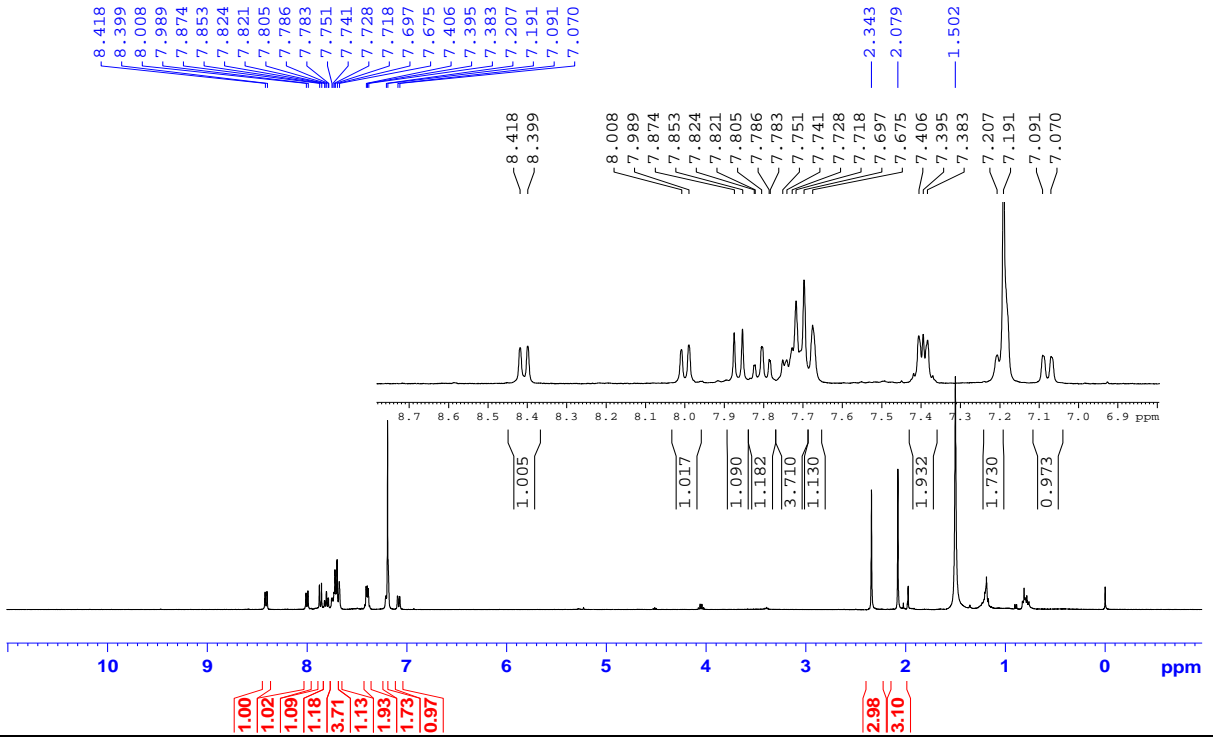

Signature SIF VIT VELLORE  
4ME-PH-PTHA-NAP-OL

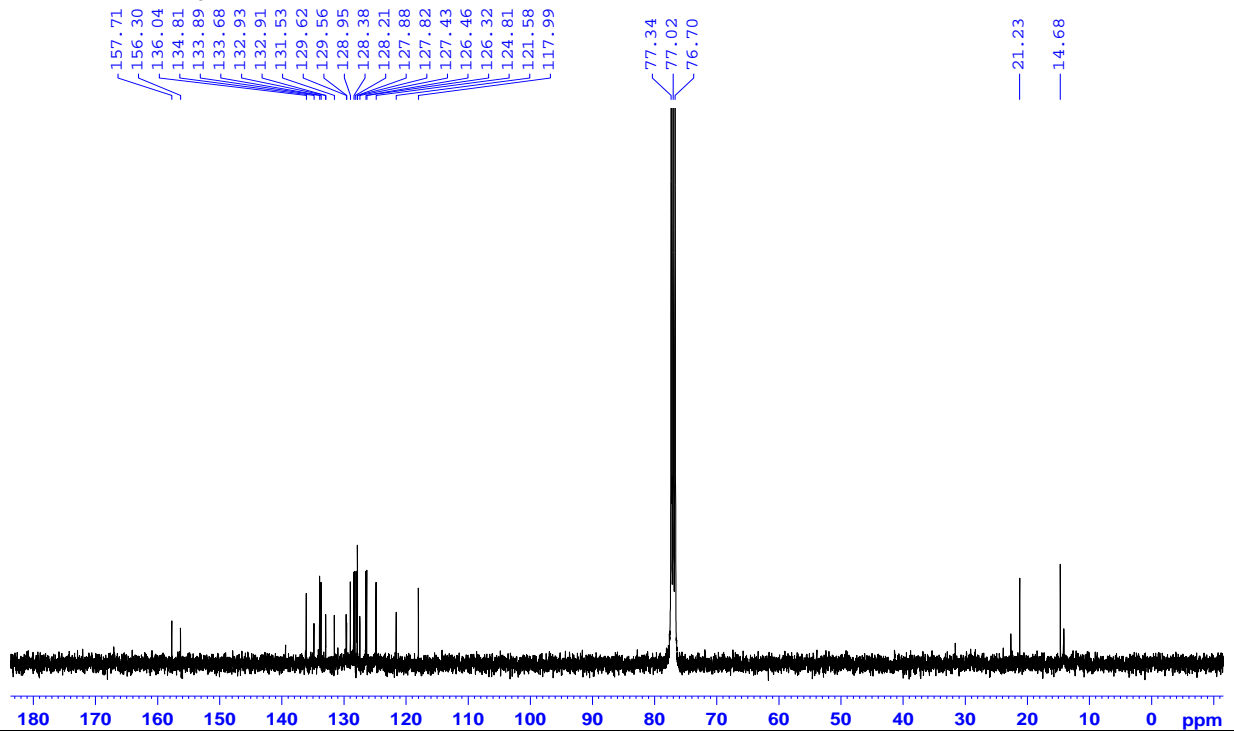

# <sup>1</sup>H NMR and <sup>13</sup>C NMR of 3ca

Signature SIF VIT VELLORE  
4F-PH-PTHA-PROP-OL

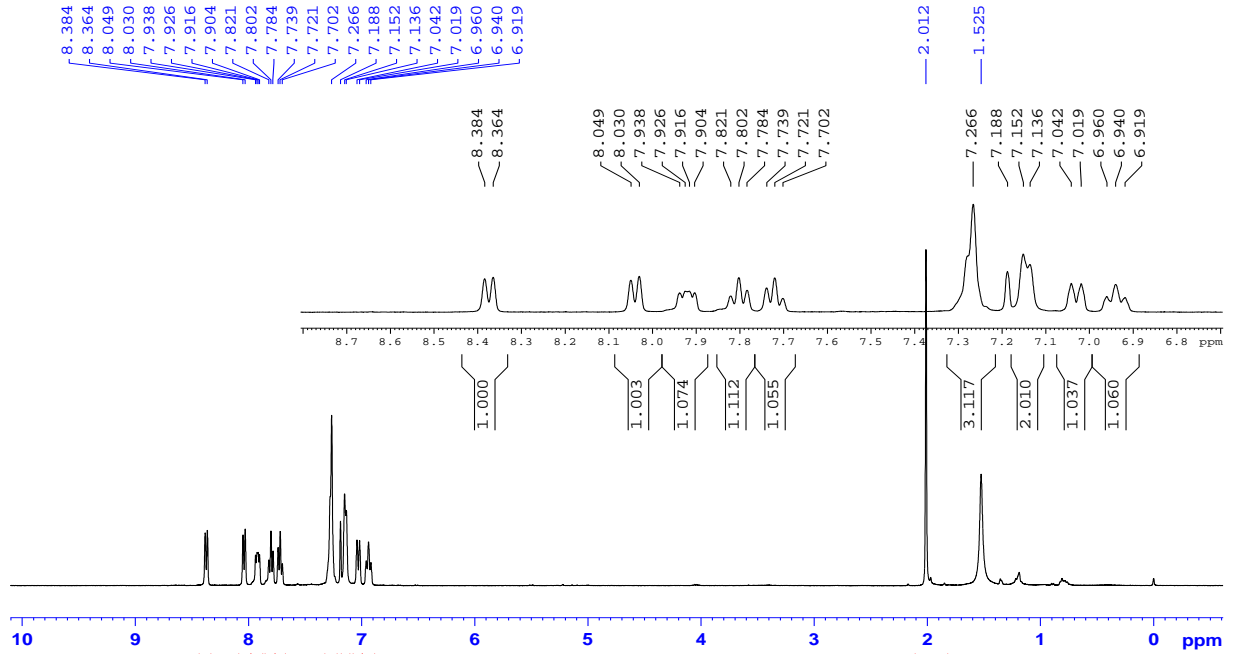

Signature SIF VIT VELLORE  
4F-PH-PTHA-PROP-OL

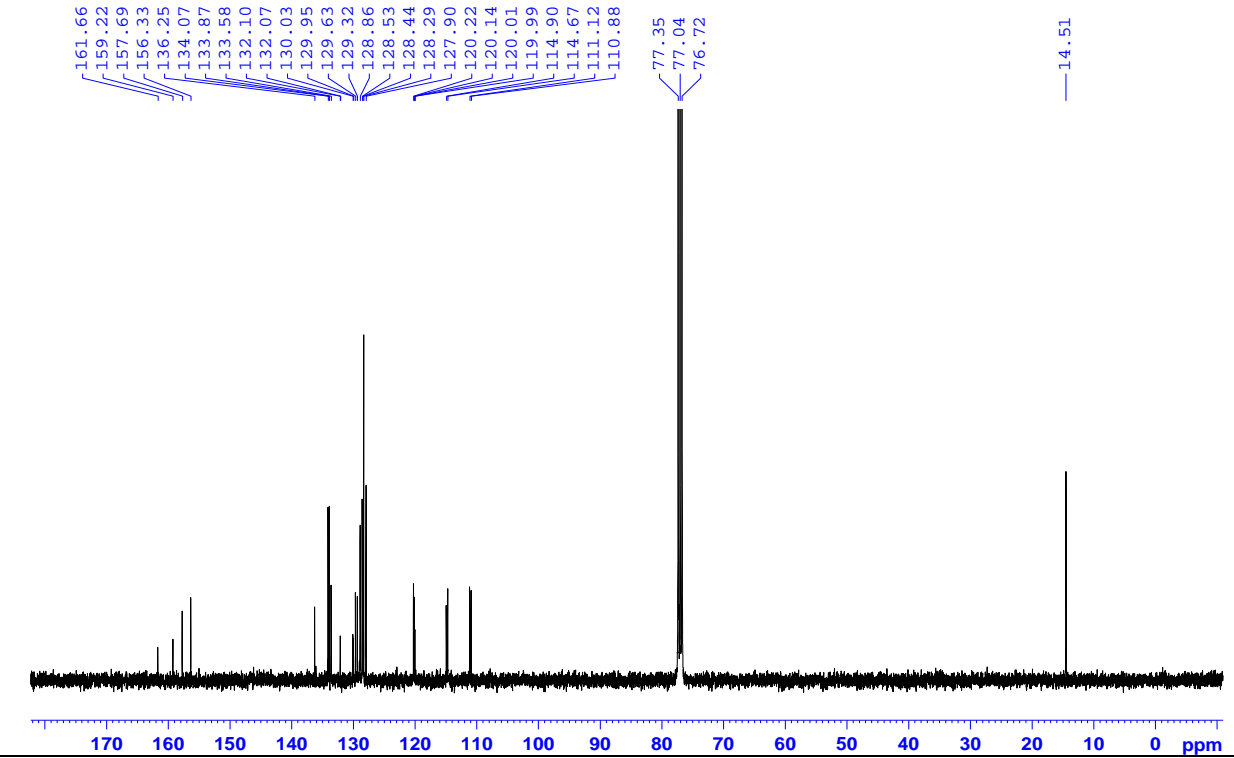

<sup>19</sup>F NMR of **3ca**

Signature SIF VIT VELLORE  
4F-PH-PTHA-PROP-OL

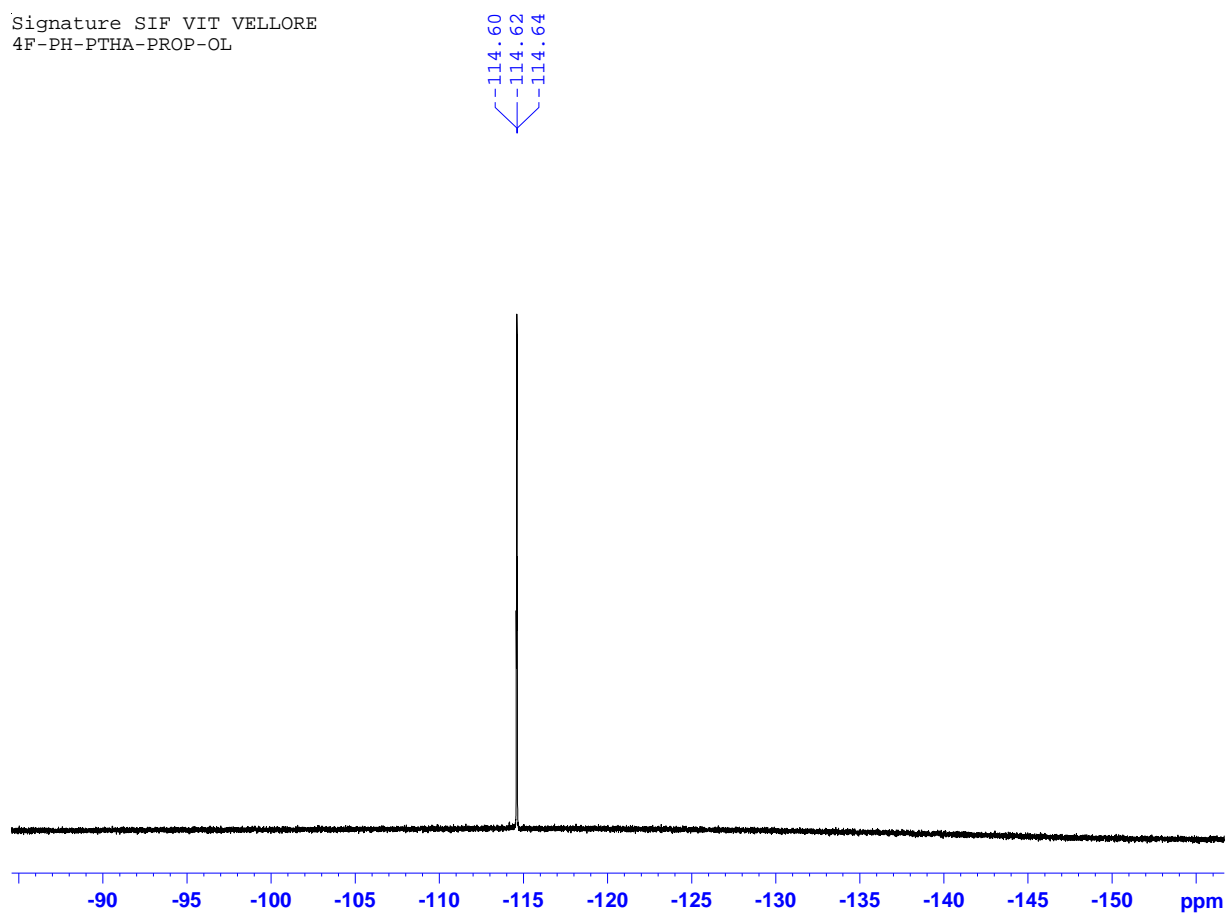

# <sup>1</sup>H NMR and <sup>13</sup>C NMR of 3cf

Signature SIF VIT VELLORE  
4F-PH-PTHA-3FPROP-OL

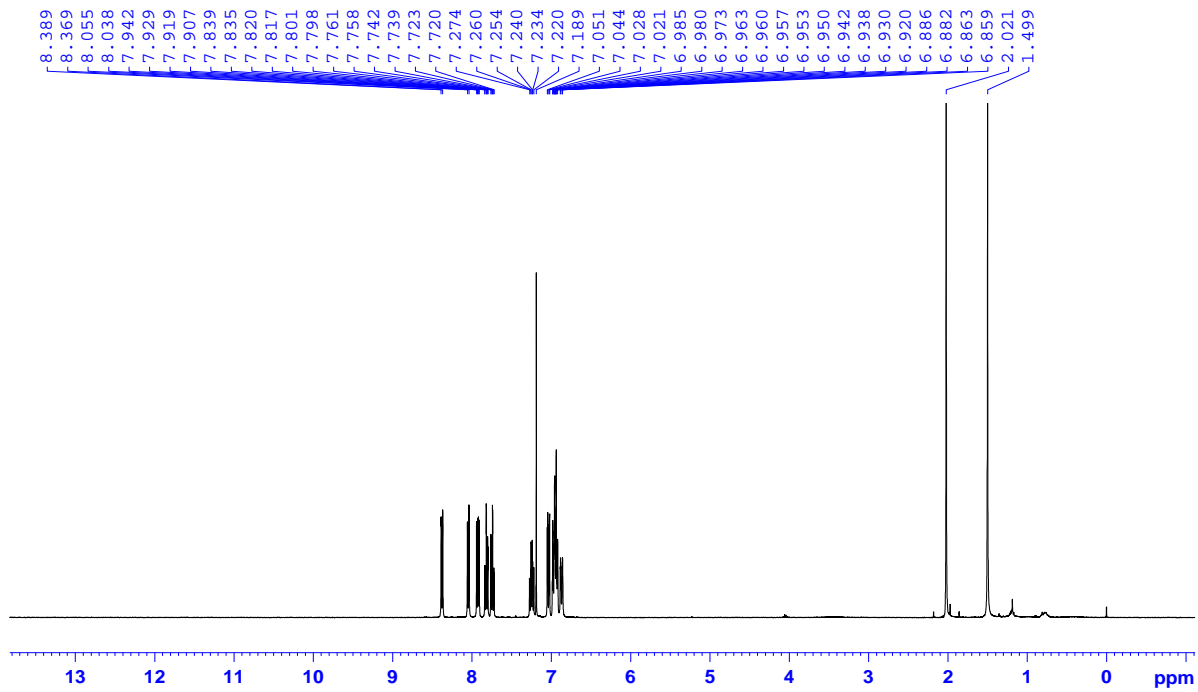

Signature SIF VIT VELLORE  
4F-MA-PH-3F-PROP-OL

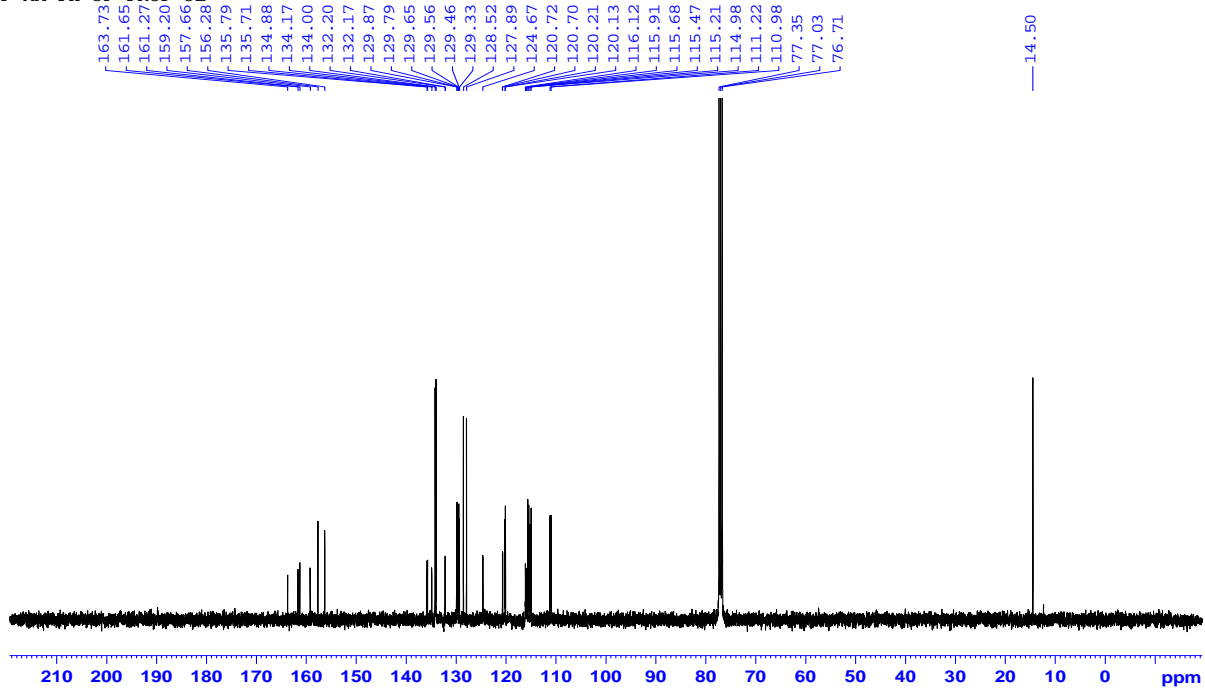

$^{19}\text{F}$  NMR of **3cf**

Signature SIF VIT VELLORE  
4F-PH-PTHA-3FPROP-OL

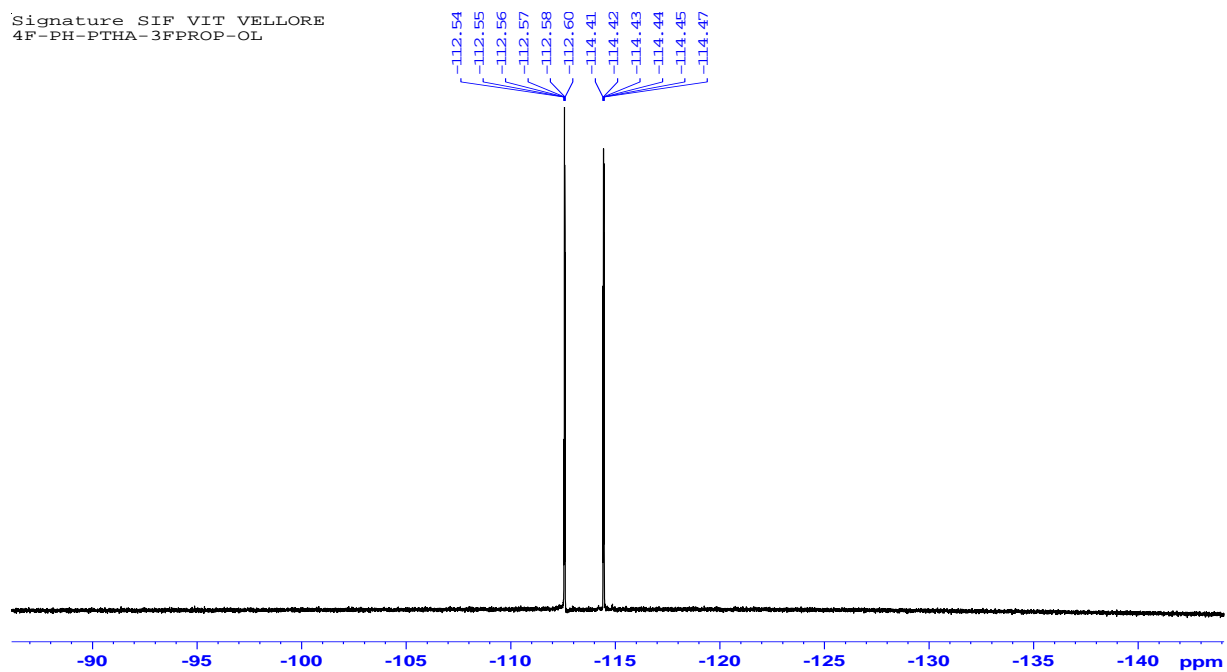

# <sup>1</sup>H NMR and <sup>13</sup>C NMR of 3da

Signature SIF VIT VELLORE  
4CL-PH-PTHA-PROP-OL

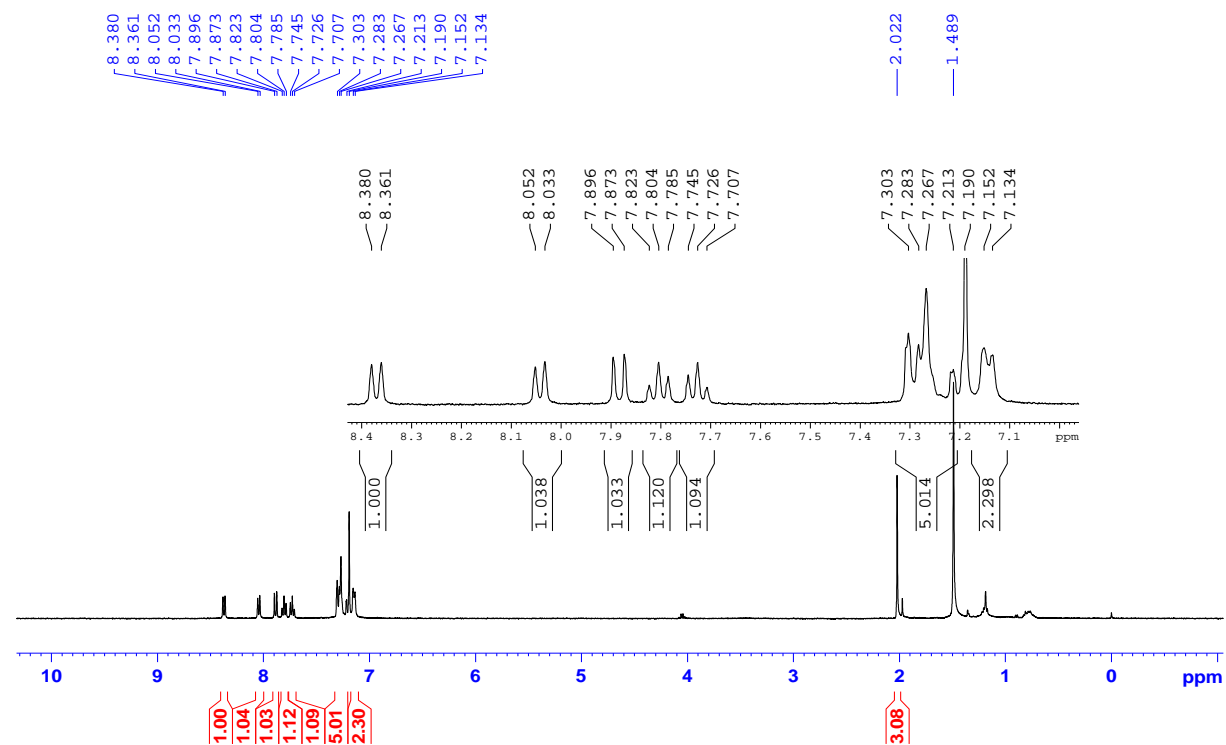

Signature SIF VIT VELLORE  
4CL-PH-PTHA-PROP-OL

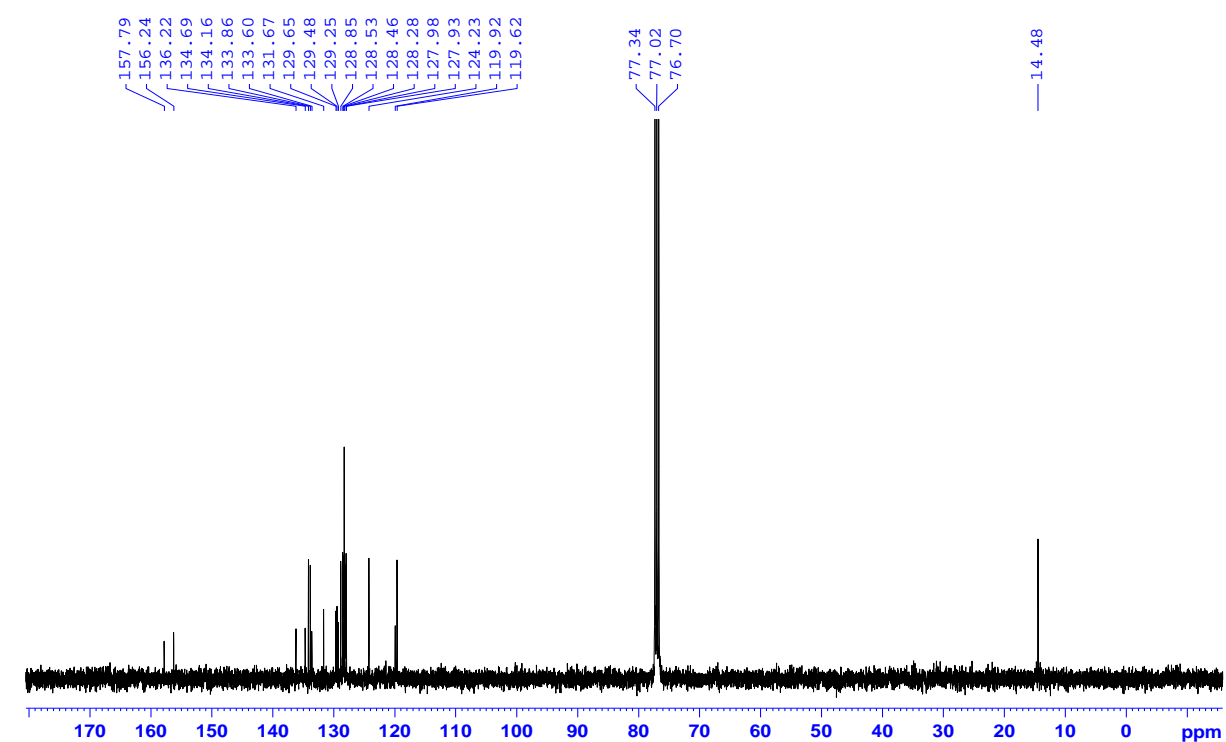

# <sup>1</sup>H NMR and <sup>13</sup>C NMR of 3dj

Signature SIF VIT VELLORE

4-CL-PH-PTHA-NAP-PROPOL

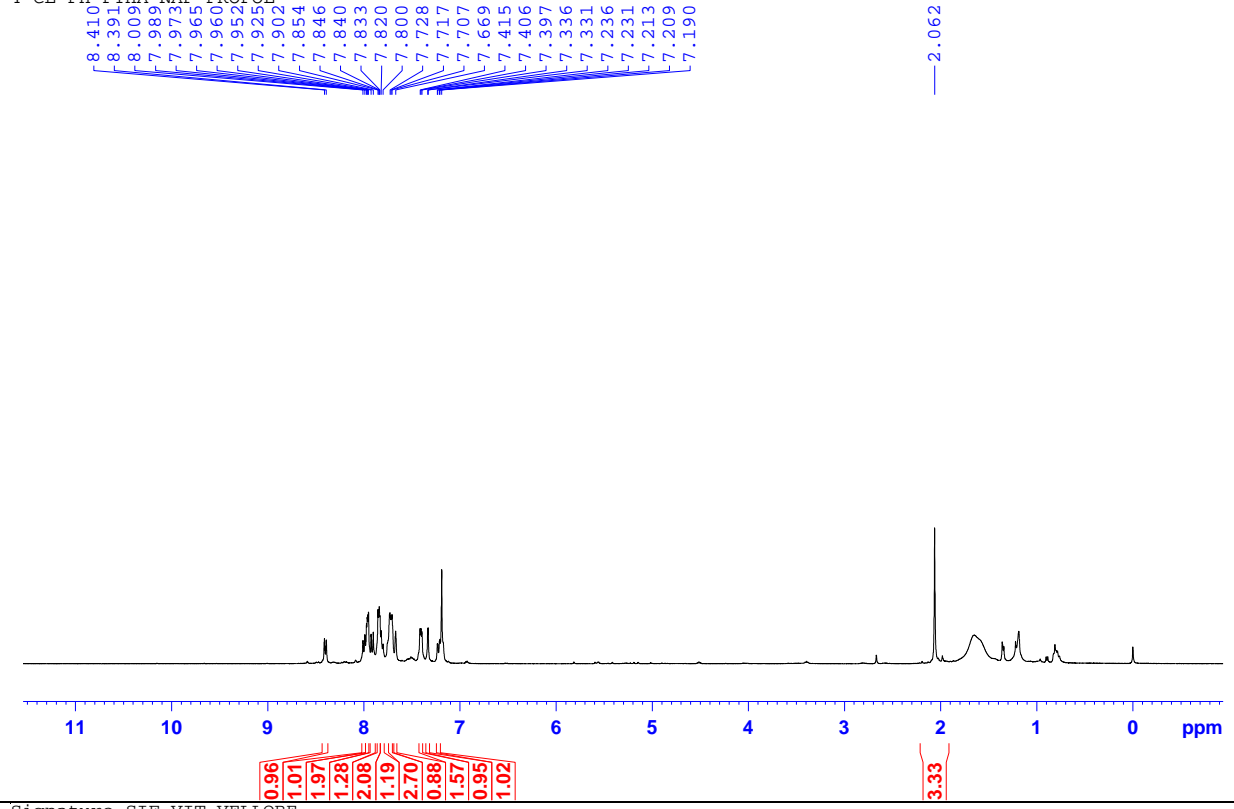

Signature SIF VIT VELLORE

4-CL-PH-PTHA-NAP-PROPOL

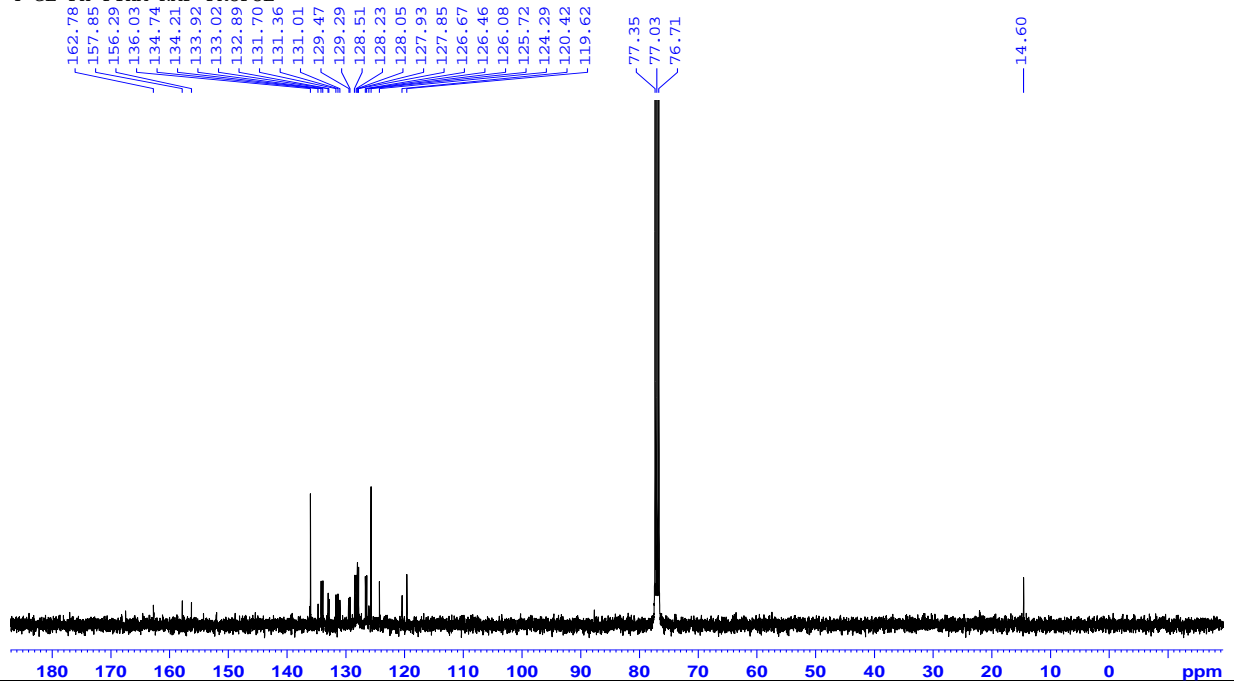

# <sup>1</sup>H NMR and <sup>13</sup>C NMR of 3ea

Signature SIF VIT VELLORE  
4BR-PH-PTHA-PH-PROPOL

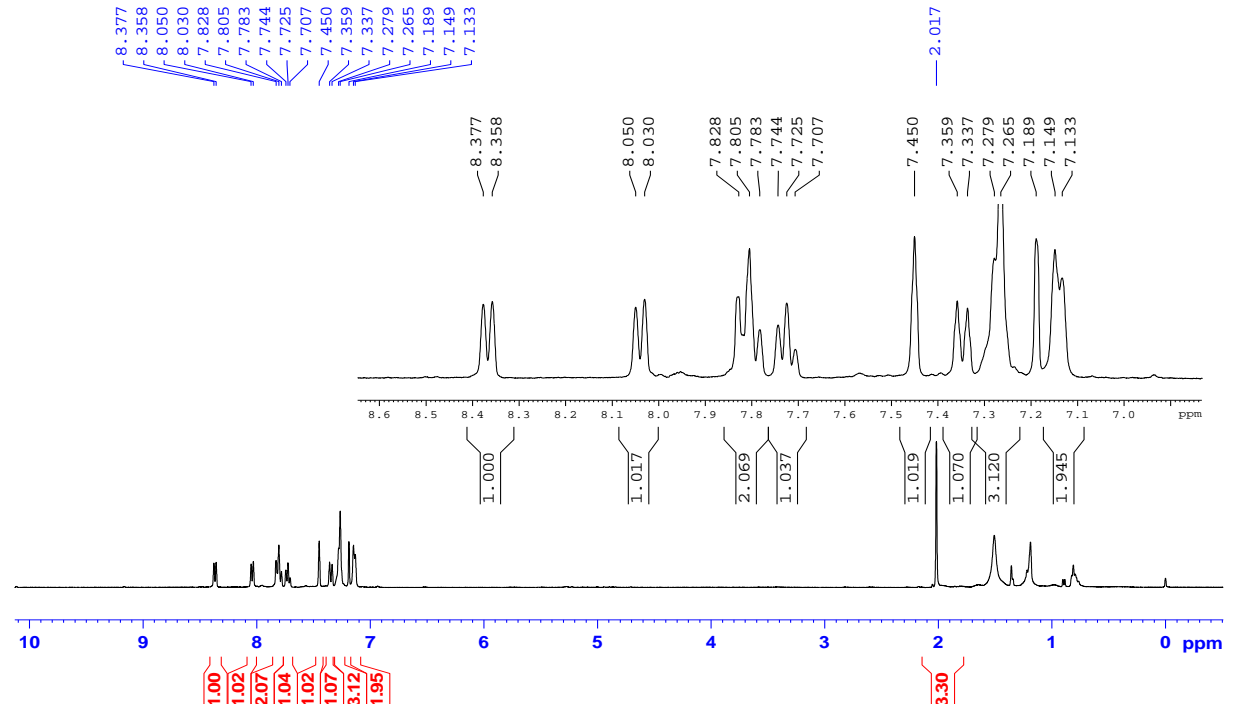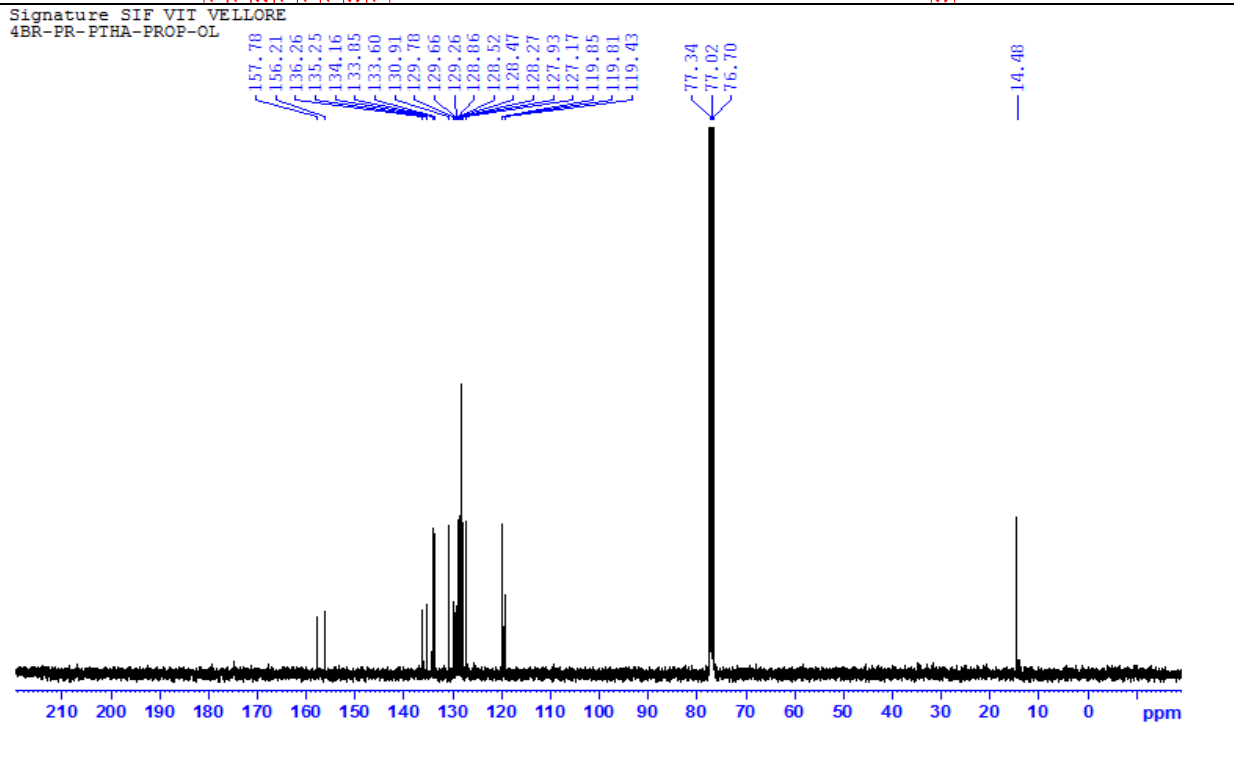



# <sup>1</sup>H NMR and <sup>13</sup>C NMR of 3fa

Signature SIF VIT VELLORE  
4CF3-PH-PHTA-PROP-OL

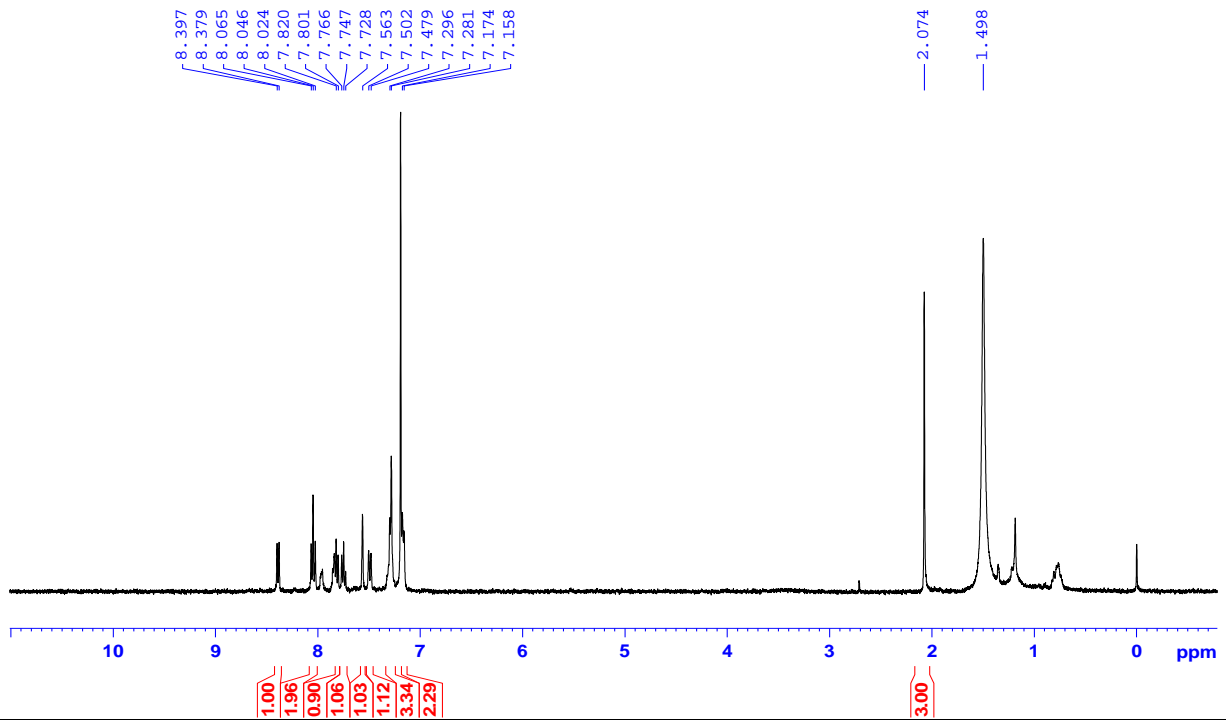

Signature SIF VIT VELLORE  
4CF3-PH-PHTA-PROP-OL

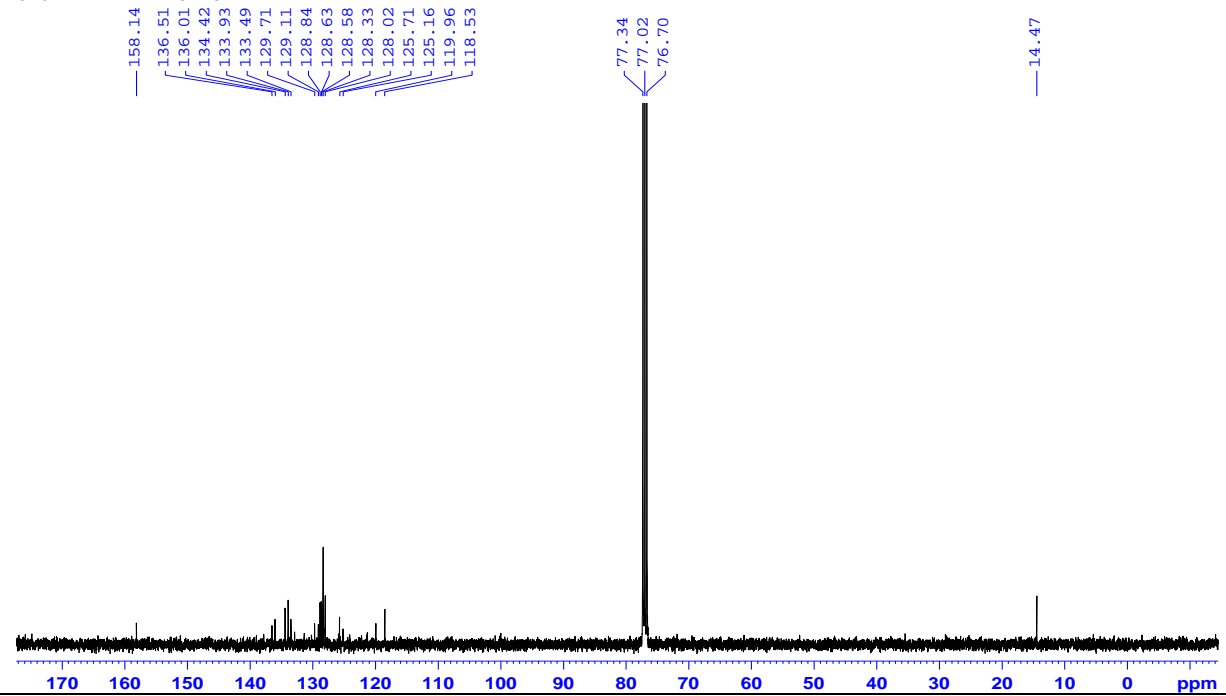

<sup>19</sup>F NMR of **3fa**

Signature SIF VIT VELLORE  
4CF3-PH-PHTA-PROP-OL

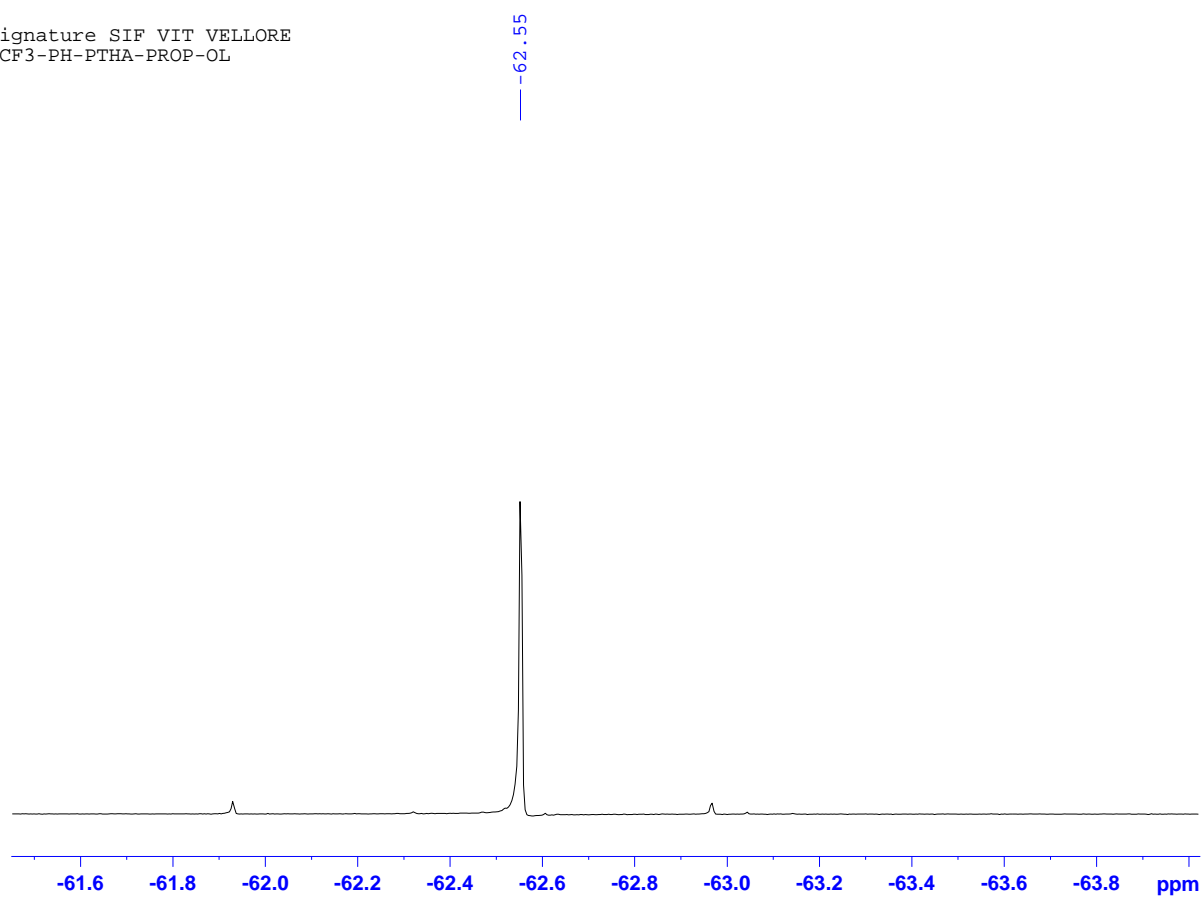

# <sup>1</sup>H NMR and <sup>13</sup>C NMR of 3ga

Signature SIF VIT VELLORE

M-CL-PH-PTHA-PROP-OL

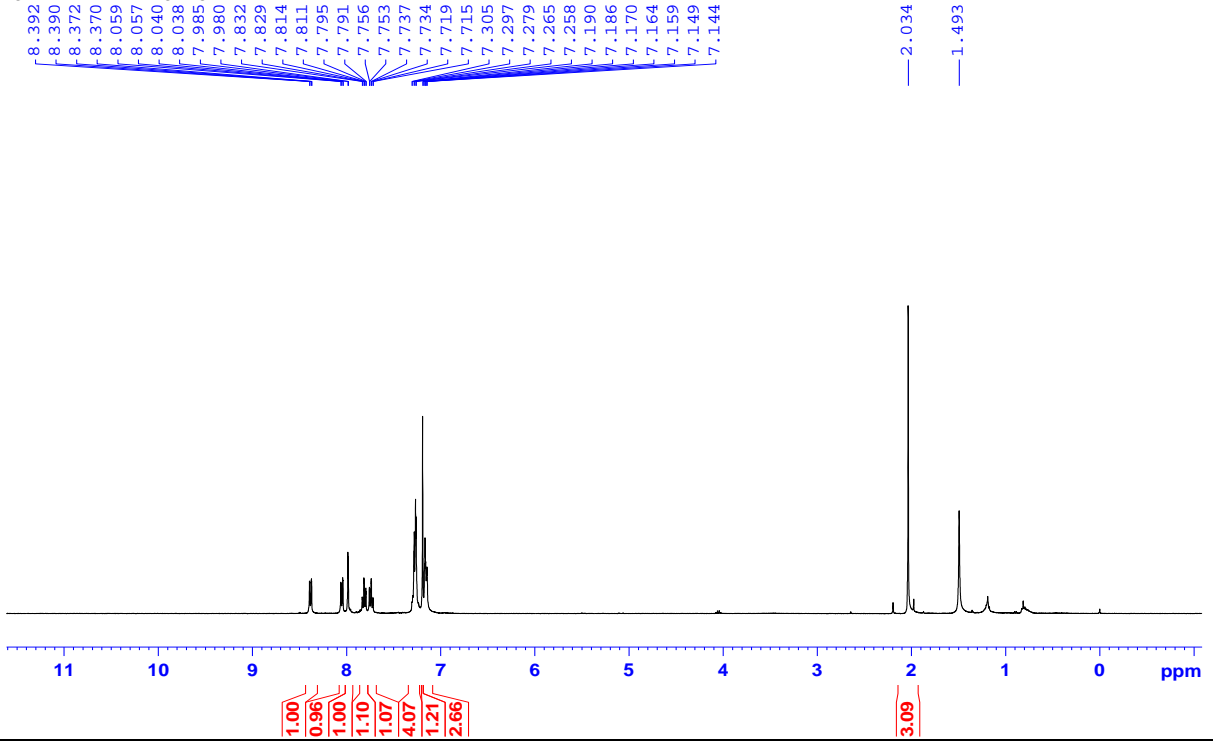

Signature SIF VIT VELLORE

M-CL-PH-PTHA-PROP-OL

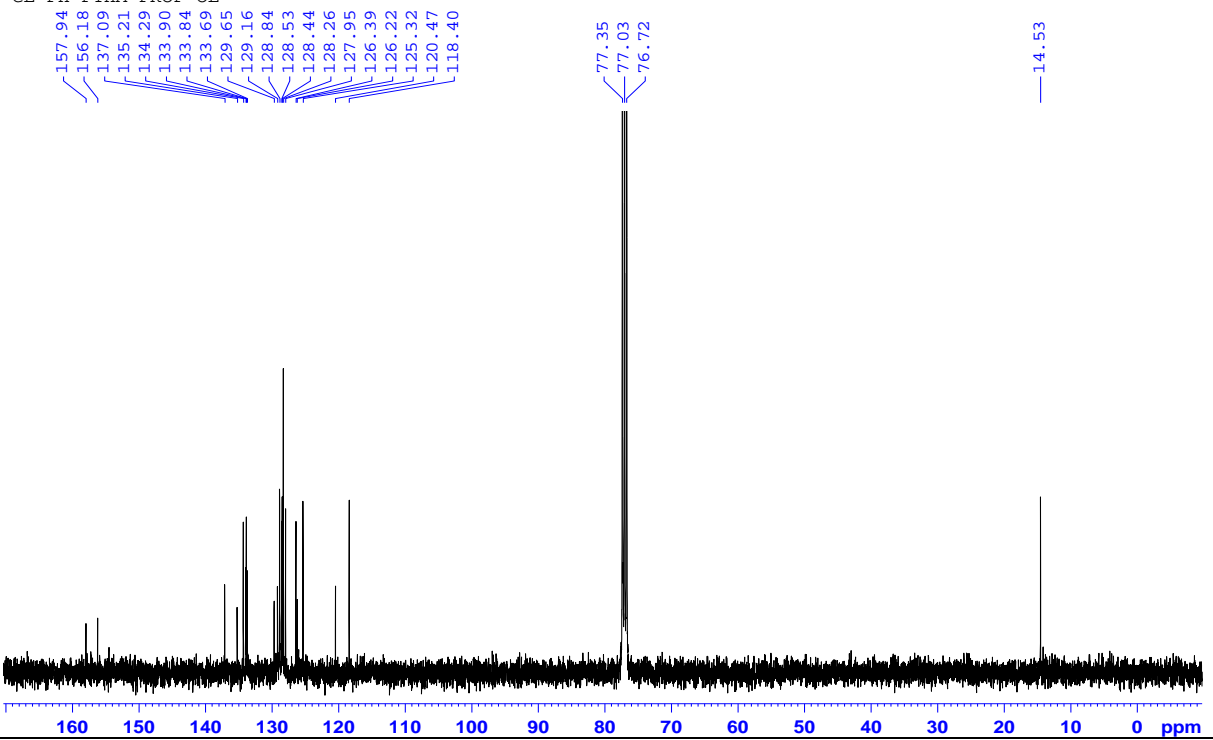

# <sup>1</sup>H NMR and <sup>13</sup>C NMR of 3ha

Signature SIF VIT VELLORE  
3BR-PH-PTHA-PROP-OL

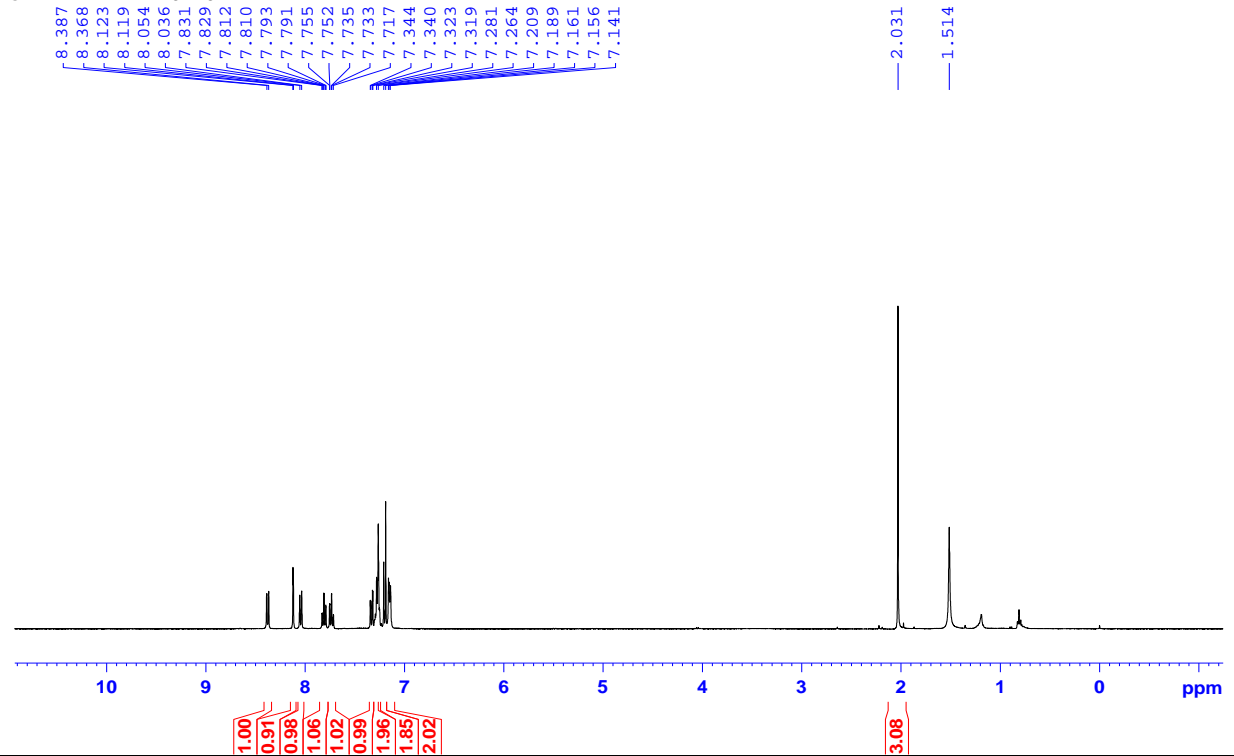

Signature SIF VIT VELLORE  
3BR-PH-PTHA-PROP-OL

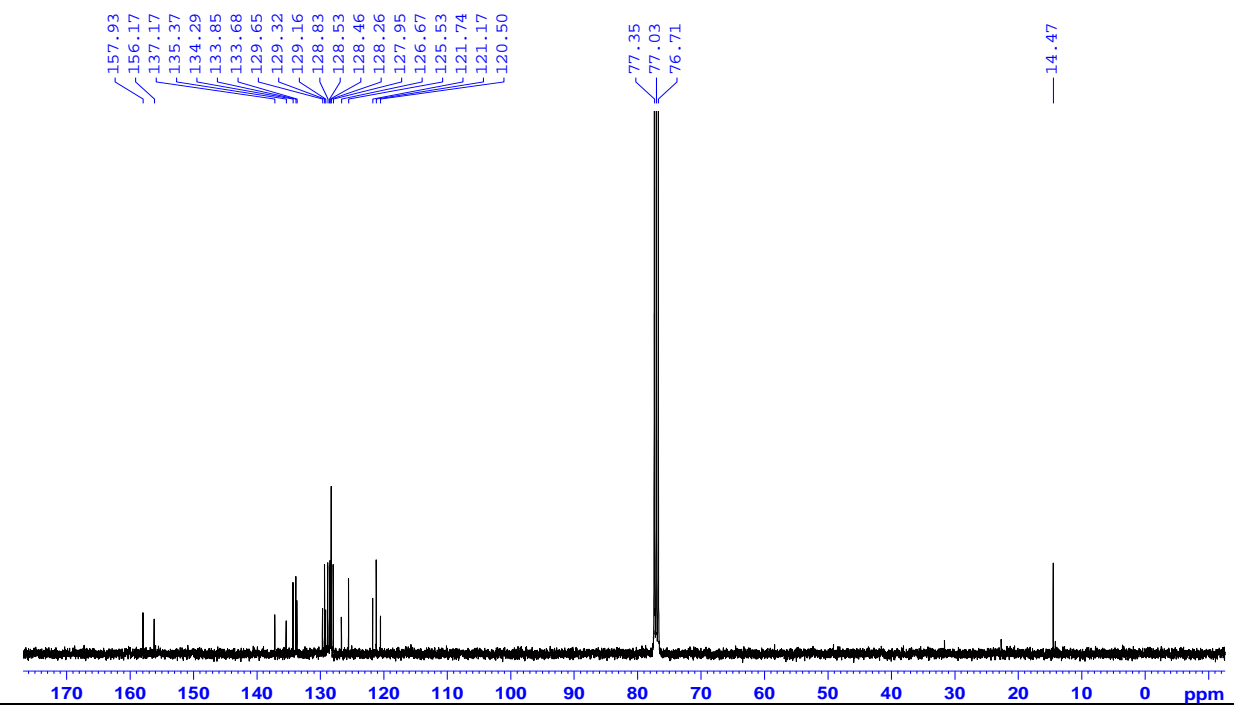

# <sup>1</sup>H NMR and <sup>13</sup>C NMR of 3ia

Signature SIF VIT VELLORE

3-NO<sub>2</sub>-PH-P<sub>3</sub>HA-PROP-OL

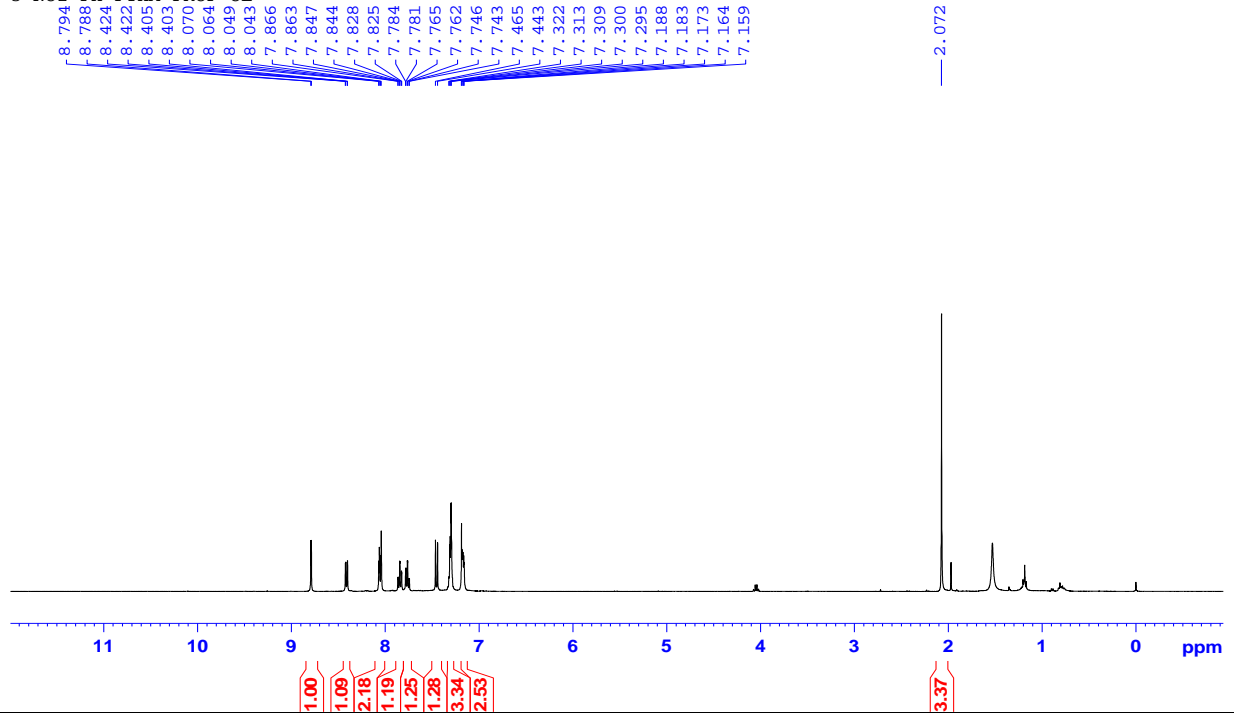

Signature SIF VIT VELLORE

3-NO<sub>2</sub>-PH-P<sub>3</sub>HA-PROP-OL

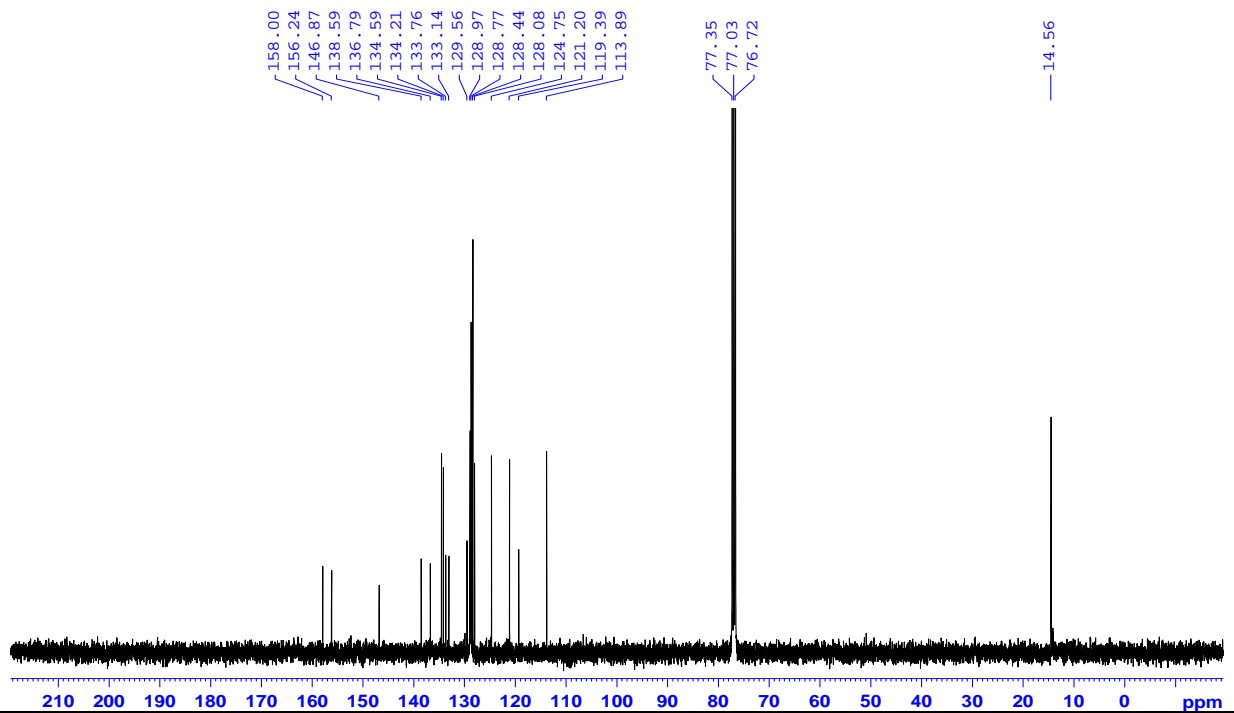

# <sup>1</sup>H NMR and <sup>13</sup>C NMR of 5aa

Signature SIF VIT VELLORE  
MA-PH-PROP-OL

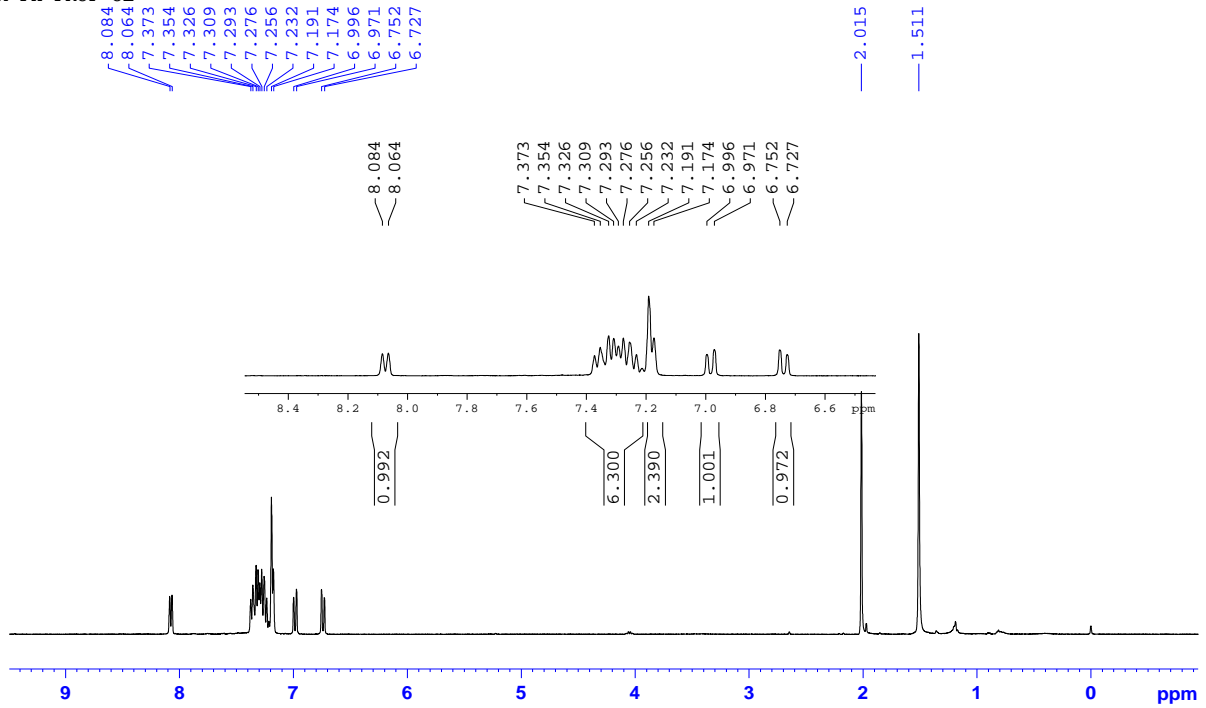

Signature SIF VIT VELLORE  
MA-PH-PROP-OL

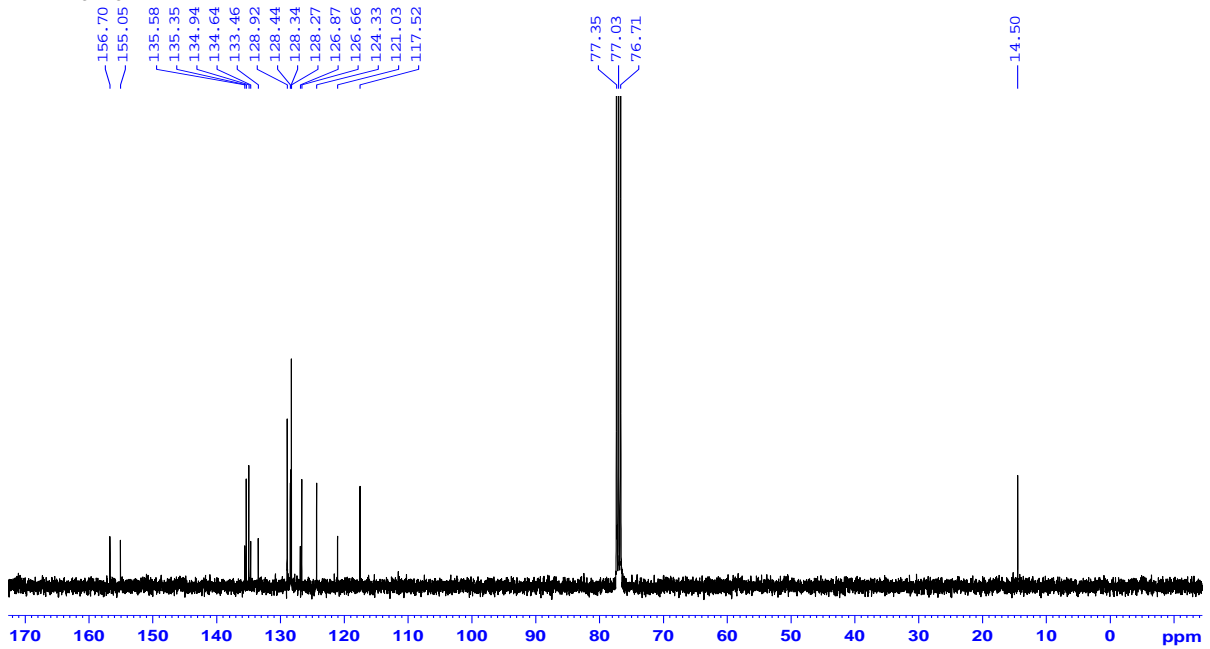

# <sup>1</sup>H NMR and <sup>13</sup>C NMR of 5ab

Signature SIF VIT VELLORE  
MA-PH-4TBU-PROP-OL

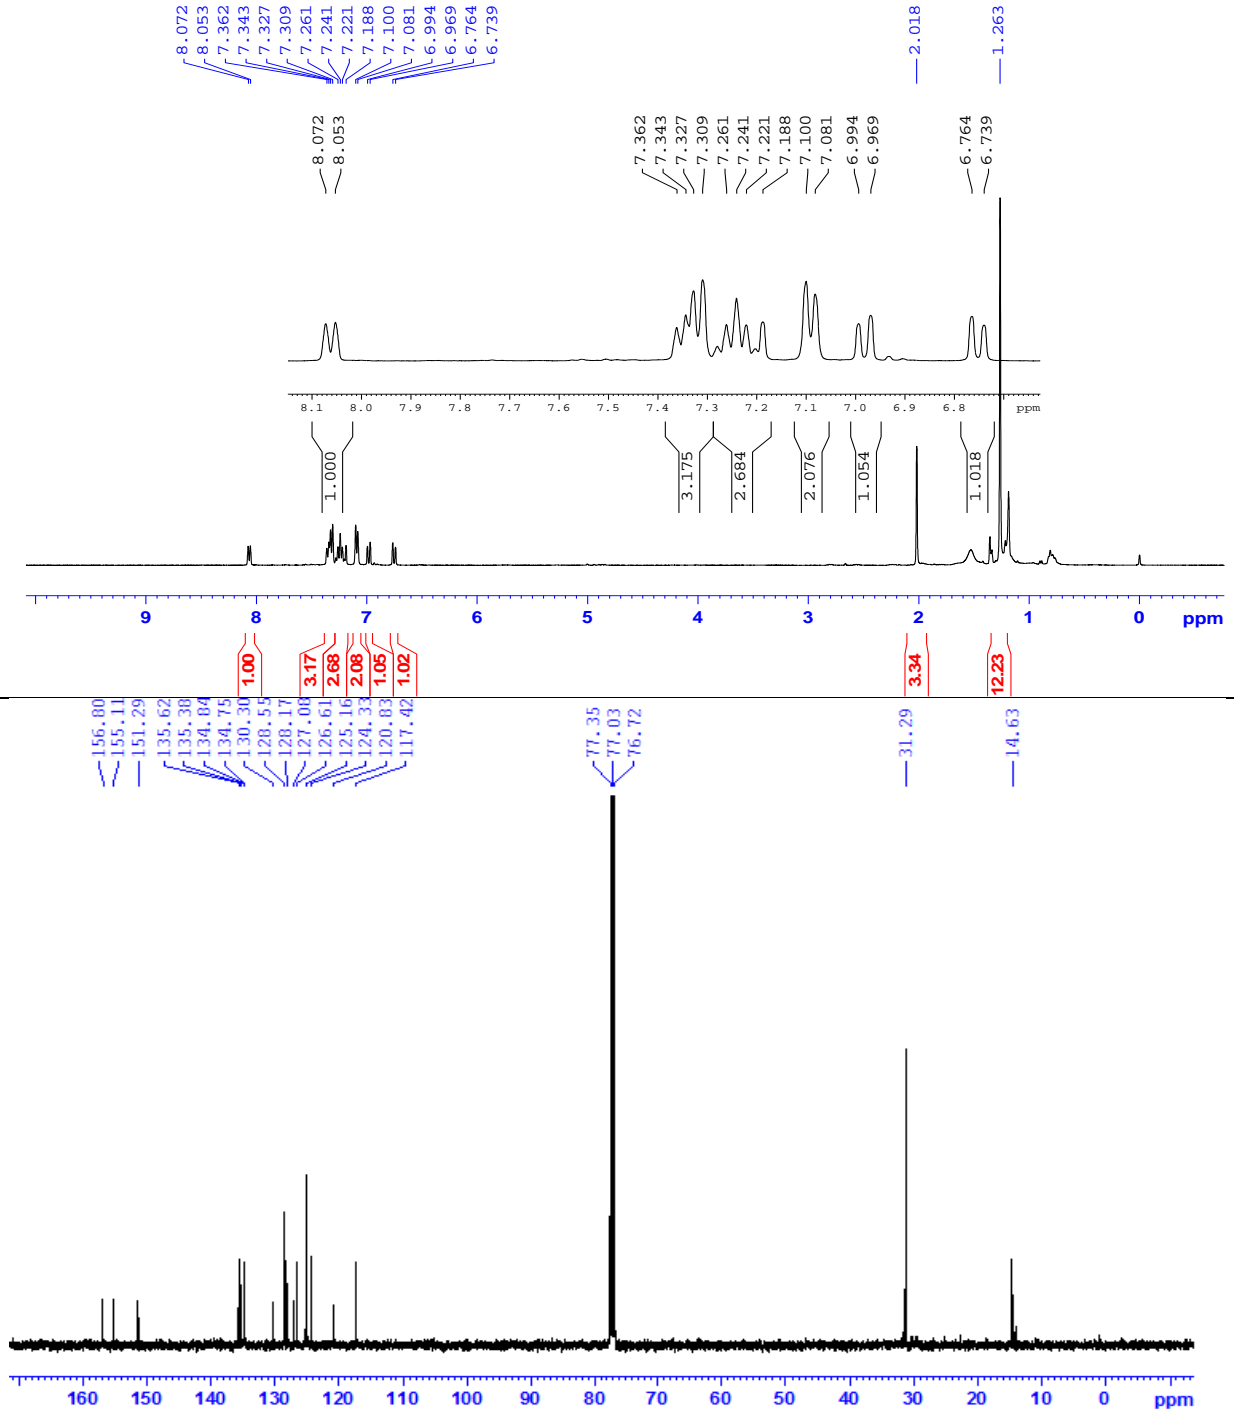

# <sup>1</sup>H NMR and <sup>13</sup>C NMR of 5ac

Signature SIF VIT VELLORE  
MA-PH-4MEO-PROP-OL

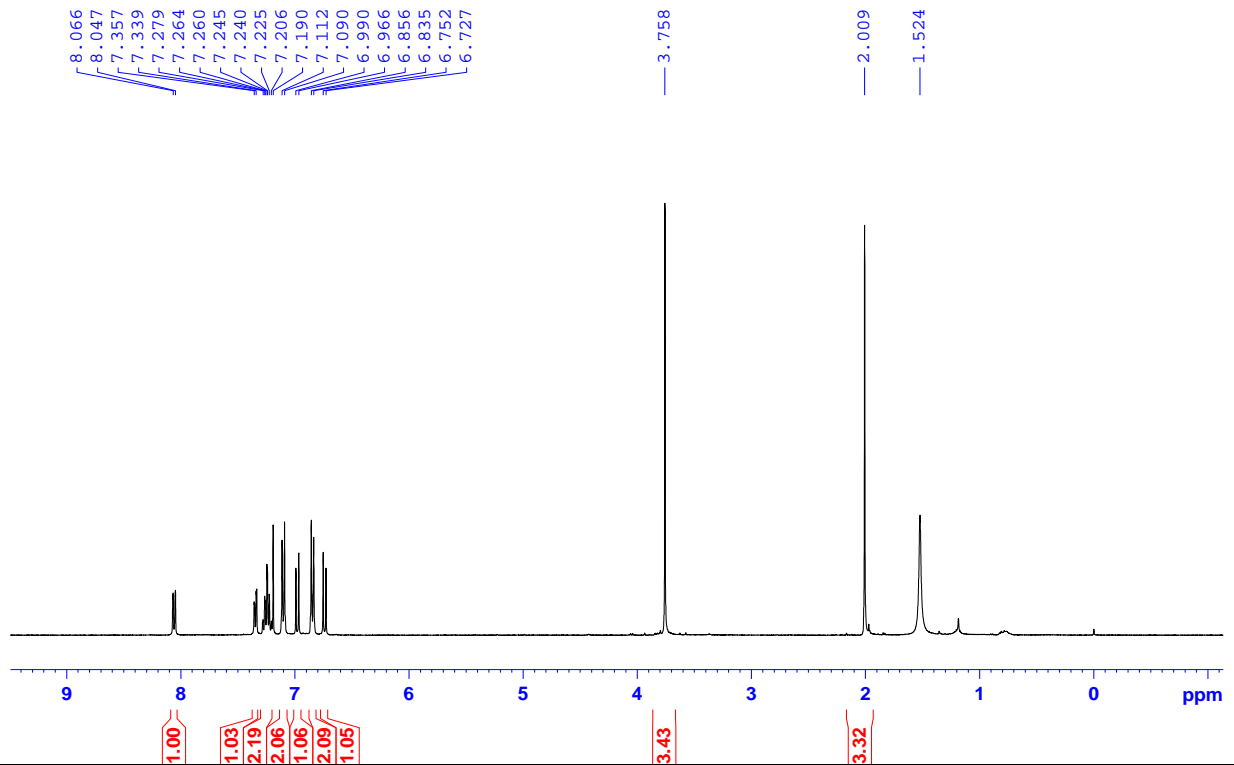

Signature SIF VIT VELLORE  
MA-PH-4MEO-PROP-OL

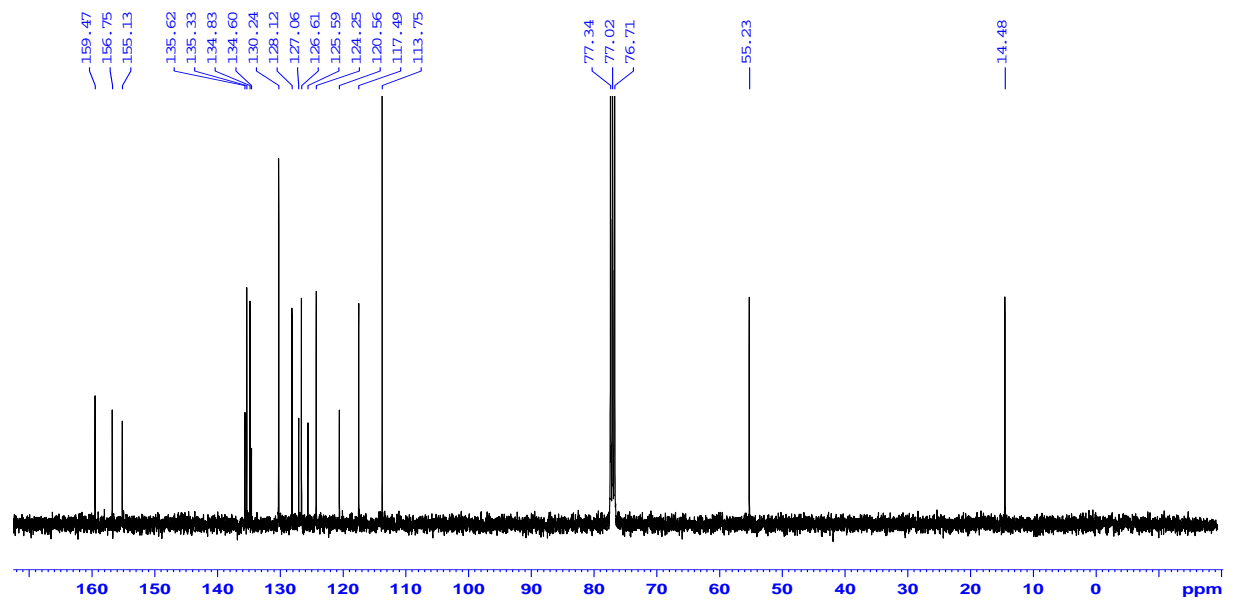



# <sup>1</sup>H NMR and <sup>13</sup>C NMR of 5ad

Signature SIF VIT VELLORE  
MA-PH-4F-PH-PROP-OL

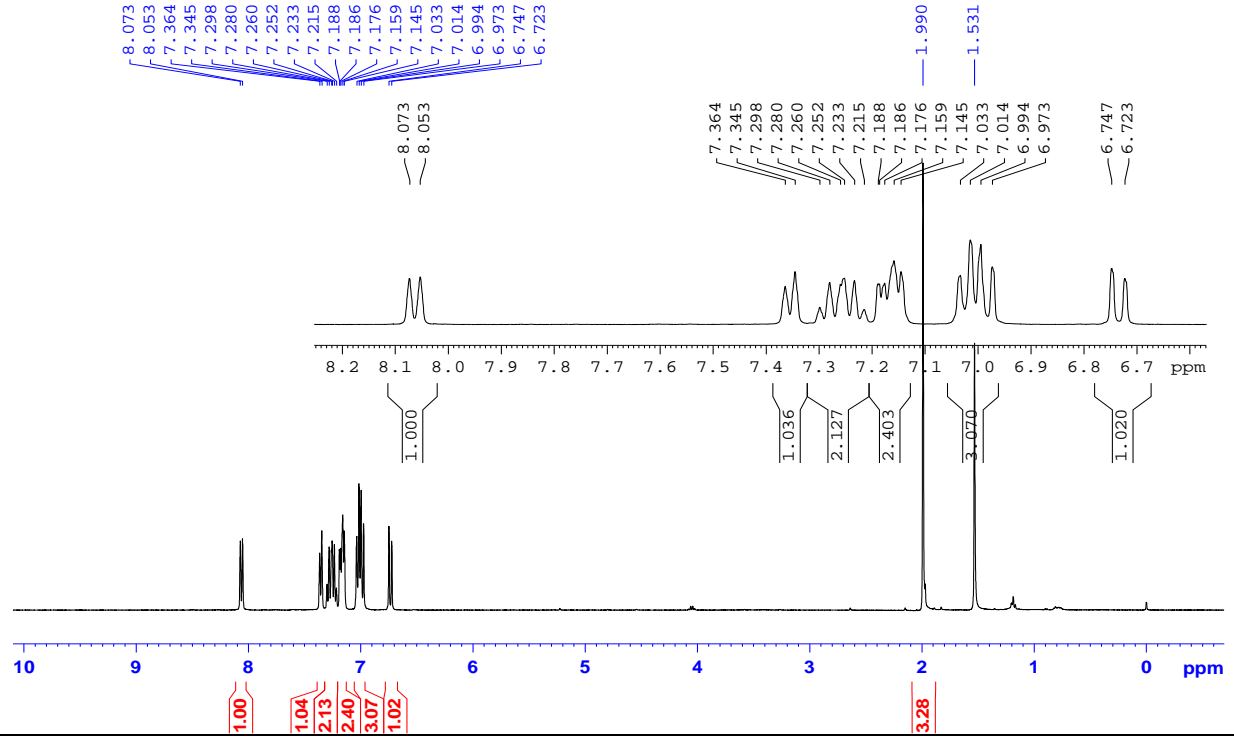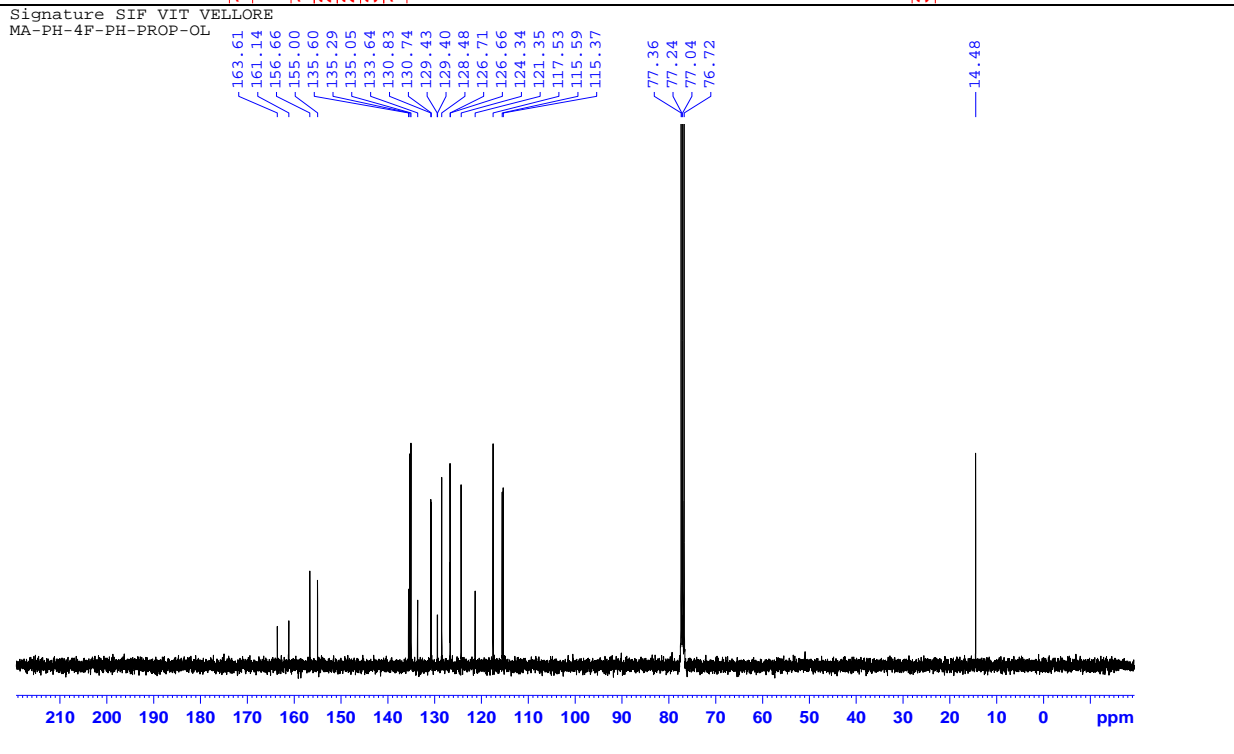

$^{19}\text{F}$  NMR of **5ad**

Signature SIF VIT VELLORE  
MA-PH-4F-PH-PROP-OL

-112.13  
-112.15  
-112.16  
-112.17  
-112.18

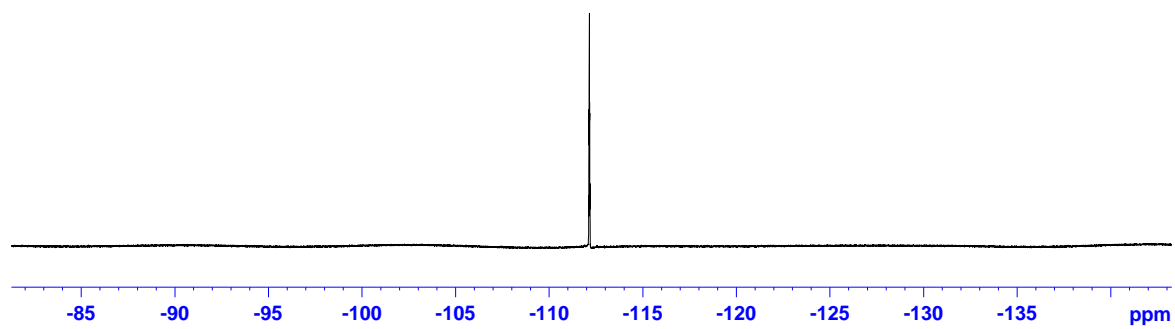

# <sup>1</sup>H NMR and <sup>13</sup>C NMR of 5ae

Signature SIF VIT VELLORE  
MA-PH-4NO2-PROP-OL

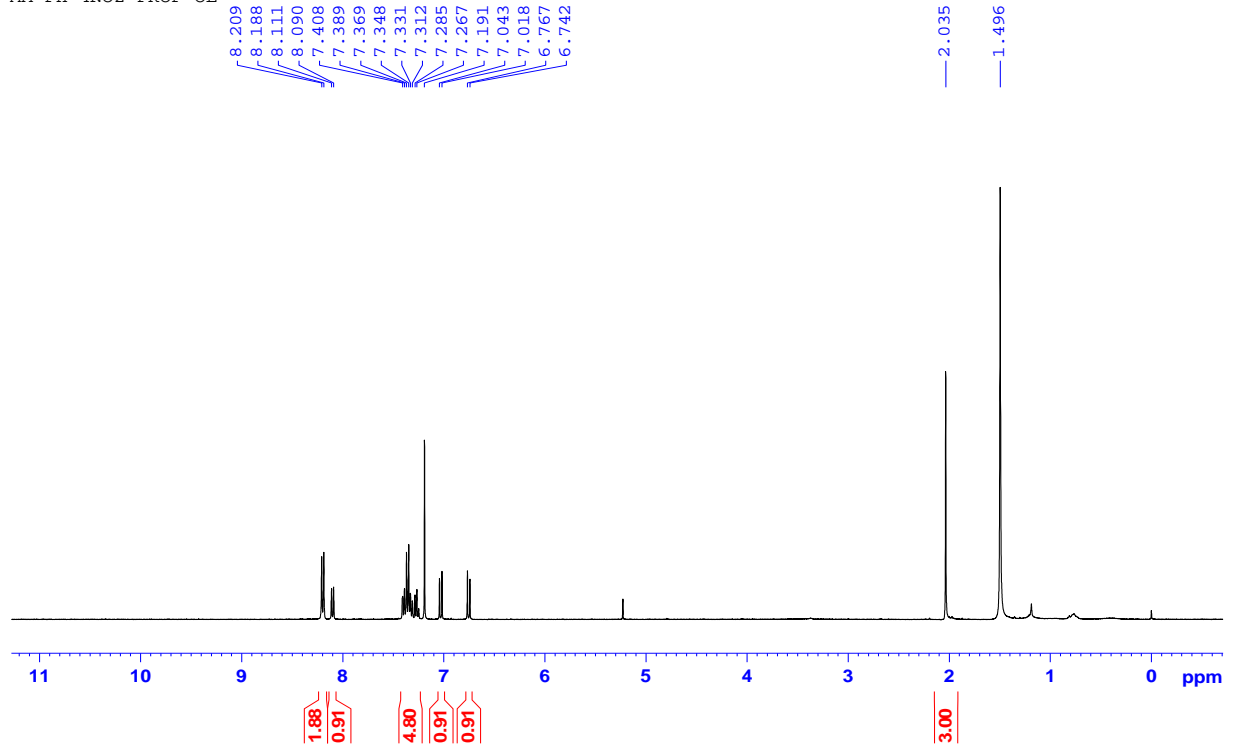

Signature SIF VIT VELLORE  
MA-PH-4NO2-PROP-OL

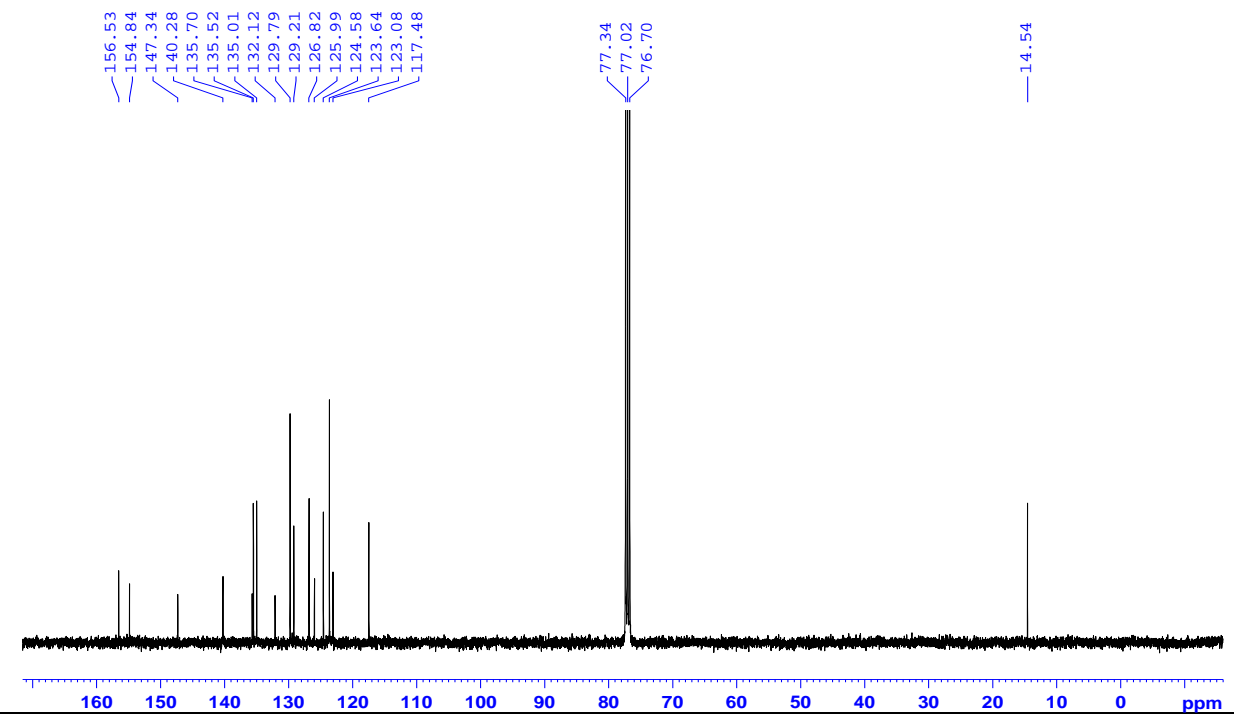

# <sup>1</sup>H NMR and <sup>13</sup>C NMR of 5af

Signature SIF VIT VELLORE  
MA-PH-3F-PROP-OL

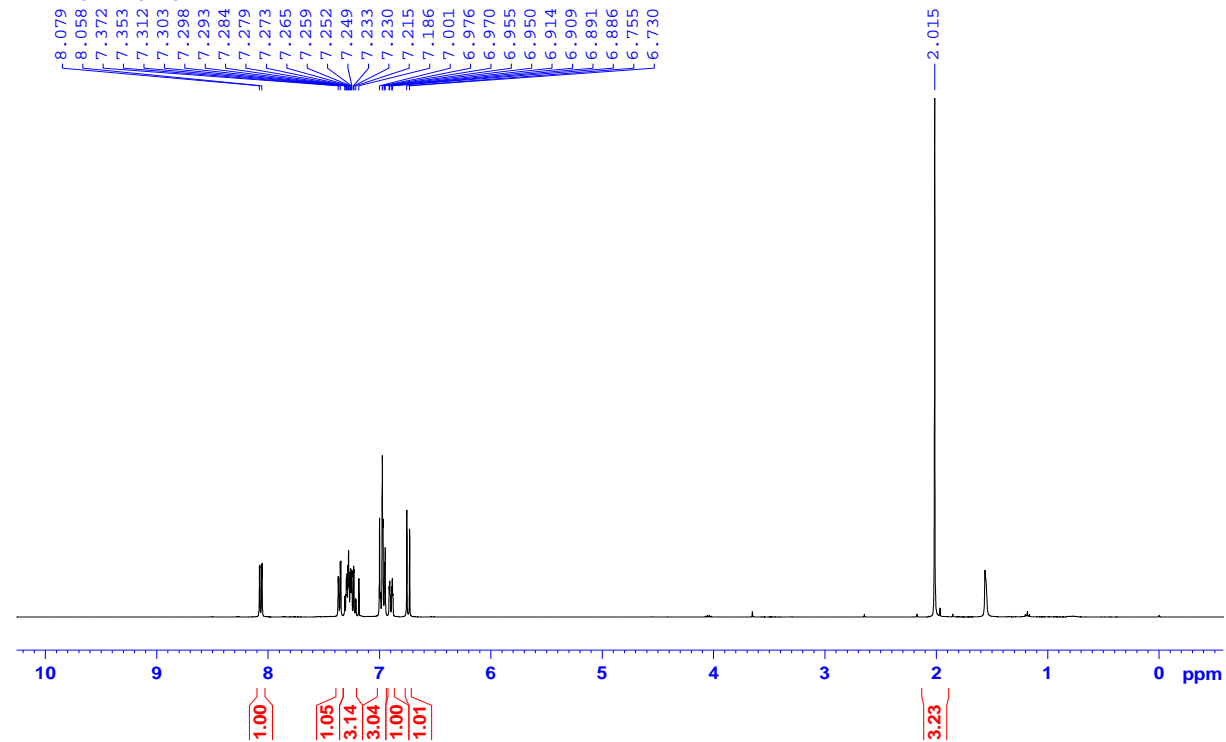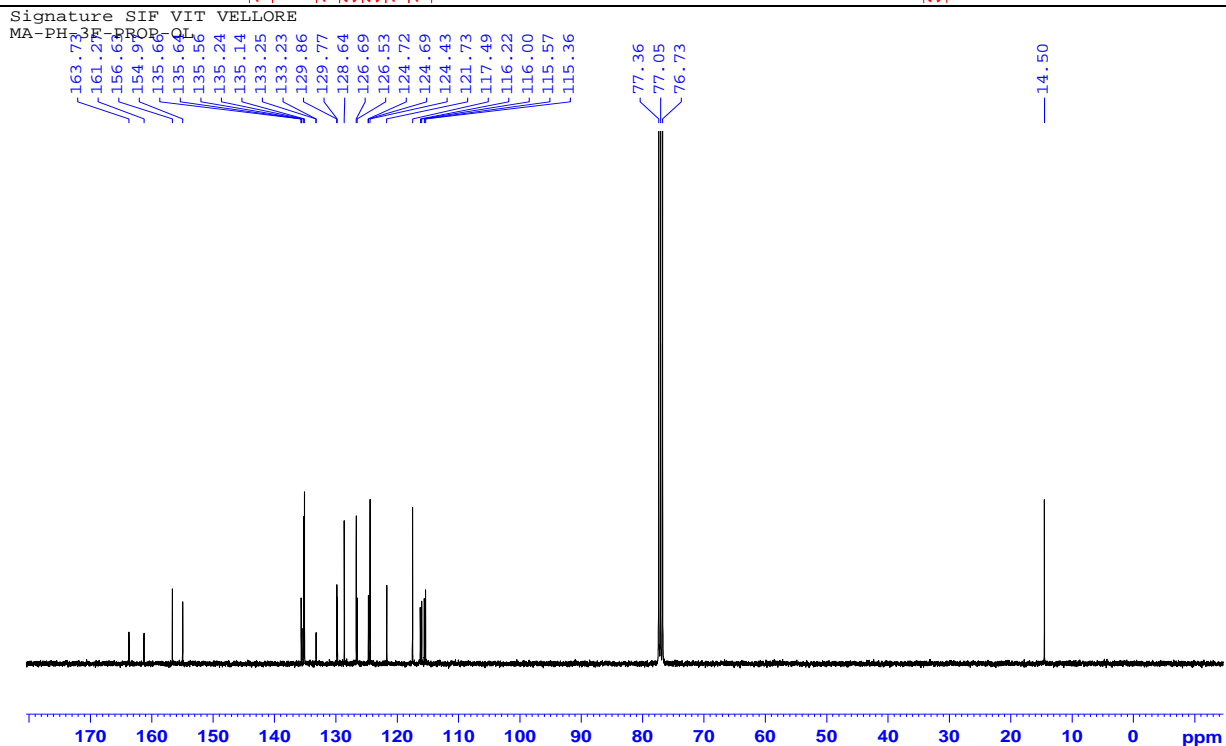

$^{19}\text{F}$  NMR of **5af**

Signature SIF VIT VELLORE  
MA-PH-3F-PROP-OL

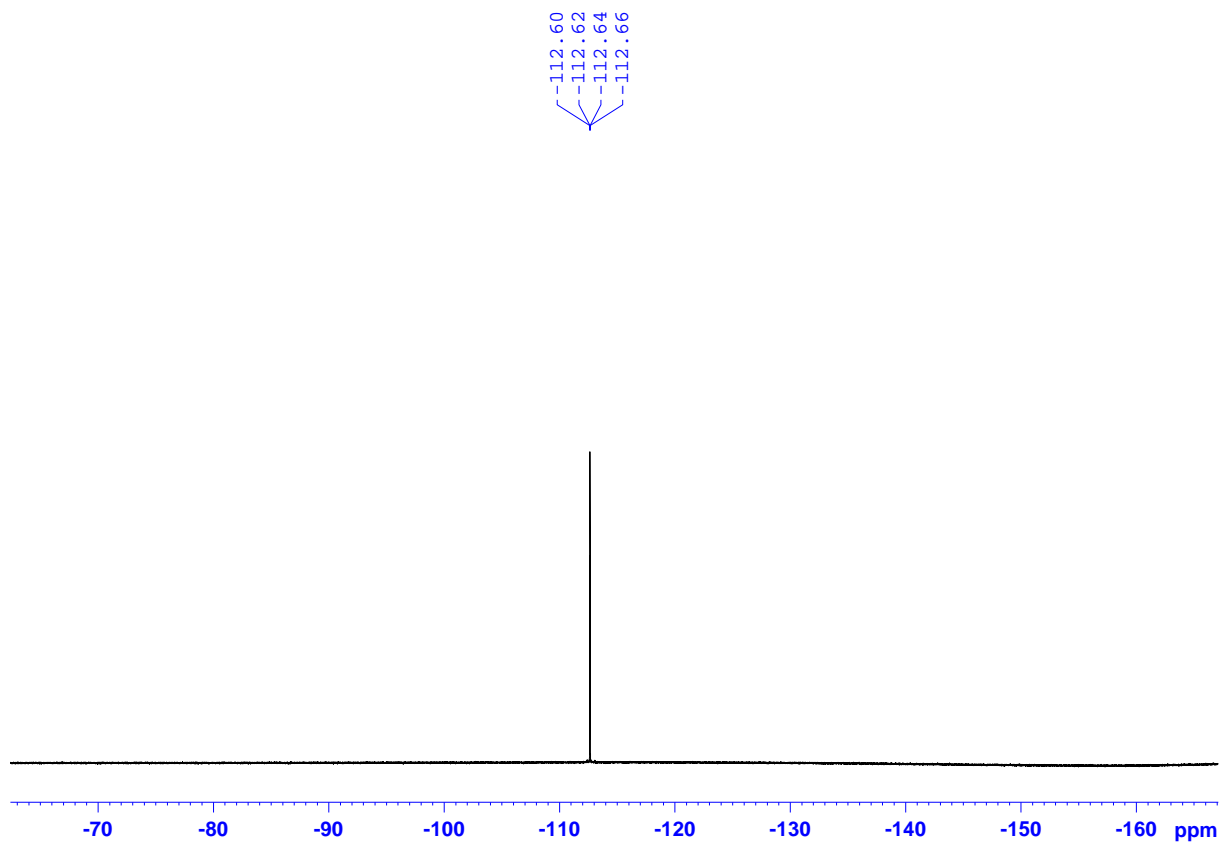

# <sup>1</sup>H NMR and <sup>13</sup>C NMR of 5ah

Signature SIF VIT VELLORE  
MA-PH-2-3DIF-PROP-OL

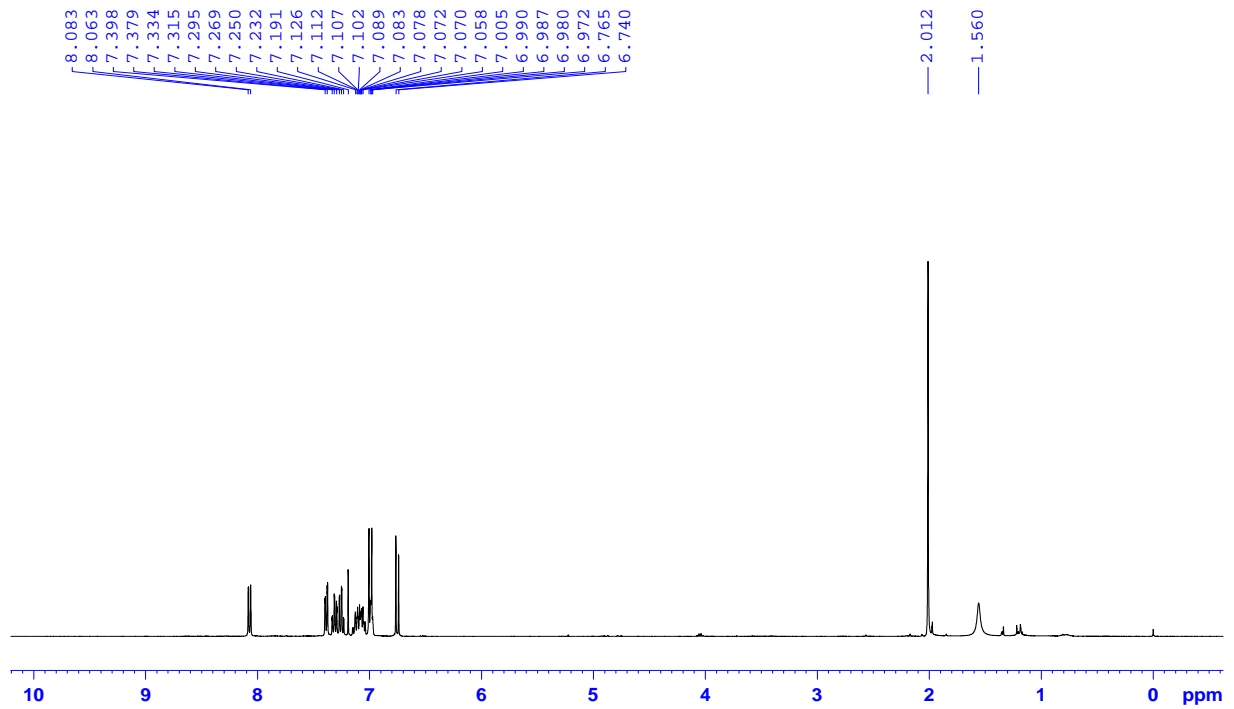

Signature SIF VIT VELLORE  
MA-PH-2-3DIF-PROP-OL

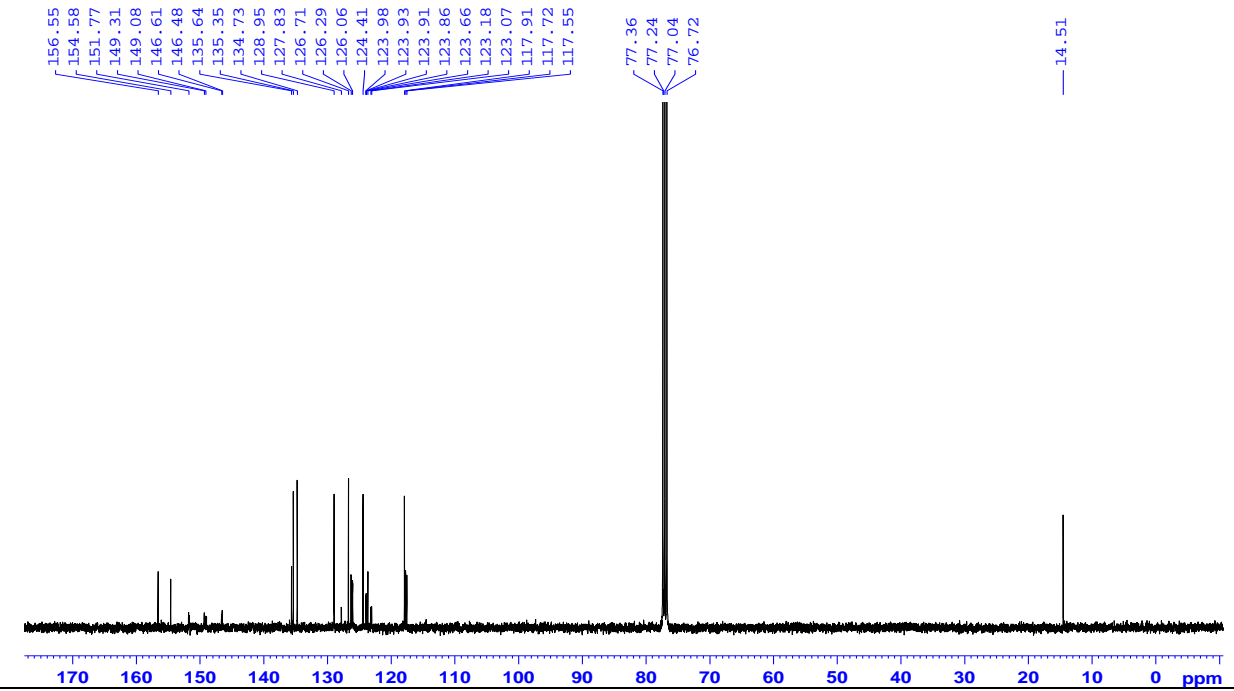

<sup>19</sup>F NMR of **5ah**

Signature SIF VIT VELLORE  
MA-PH-2-3DIF-PROP-OL

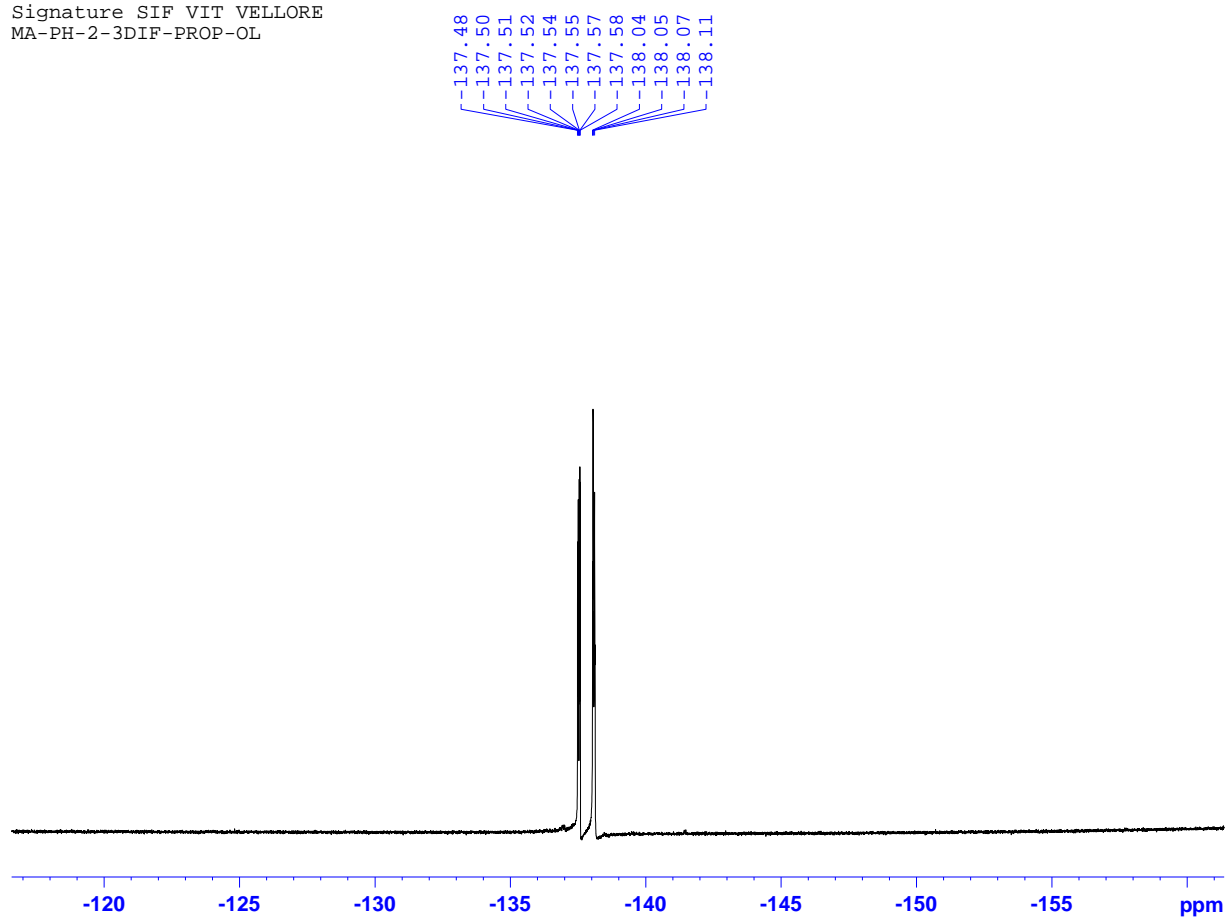

# <sup>1</sup>H NMR and <sup>13</sup>C NMR of 5aj

Signature SIF VIT VELLORE

MA-PH-NAP-PROP-OL

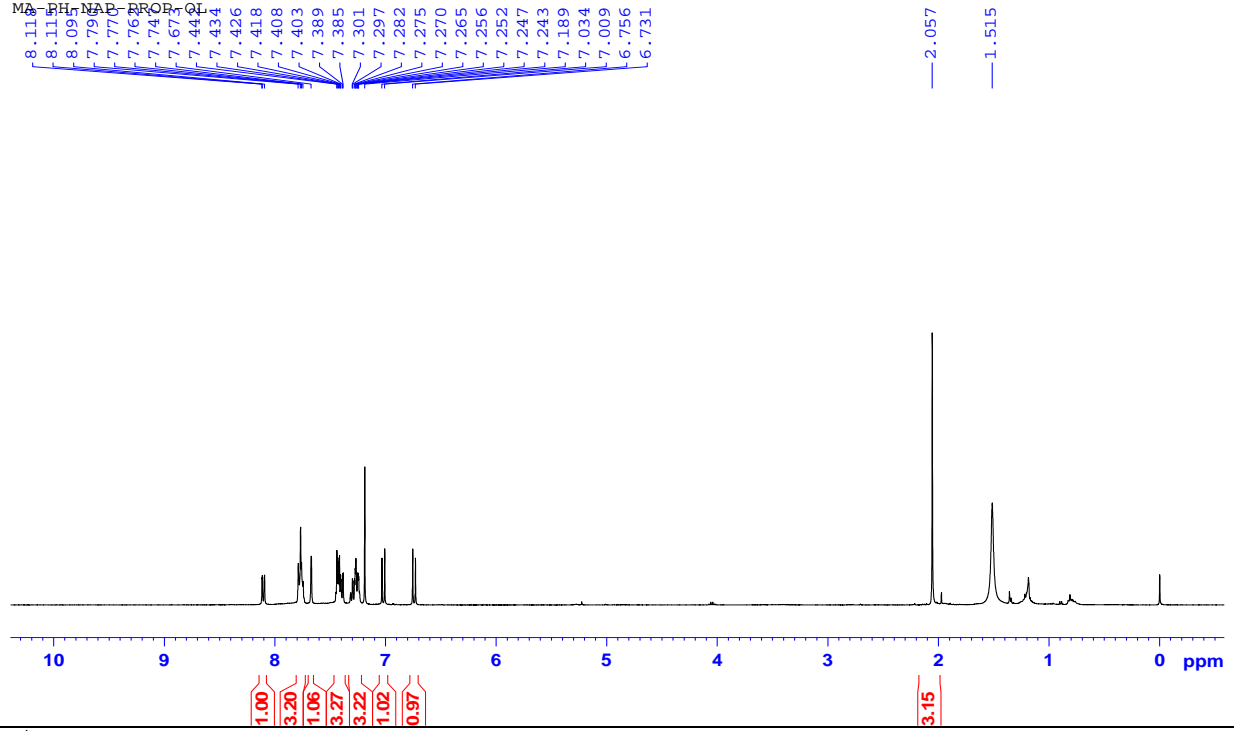

Signature SIF VIT VELLORE

MA-PH-NAP-PROP-OL

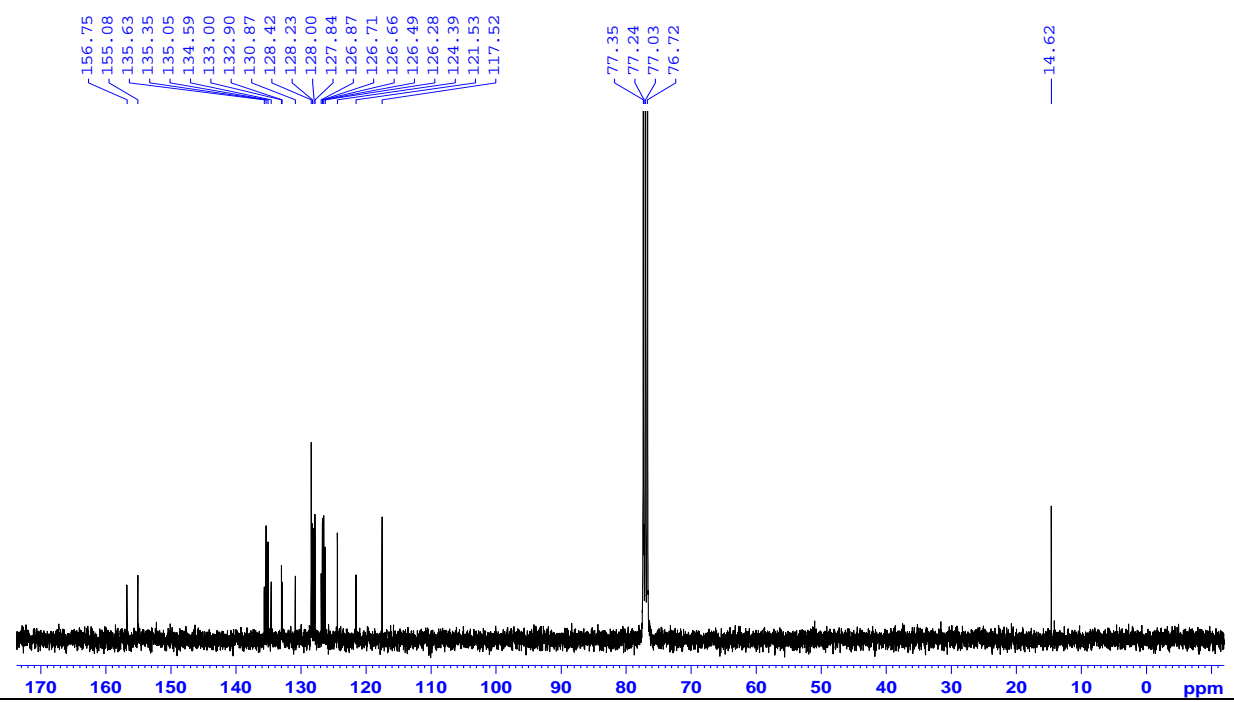



# <sup>1</sup>H NMR and <sup>13</sup>C NMR of 5ak

Signature SIF VIT VELLORE  
MA-PH-BIPHE-PROP-OL

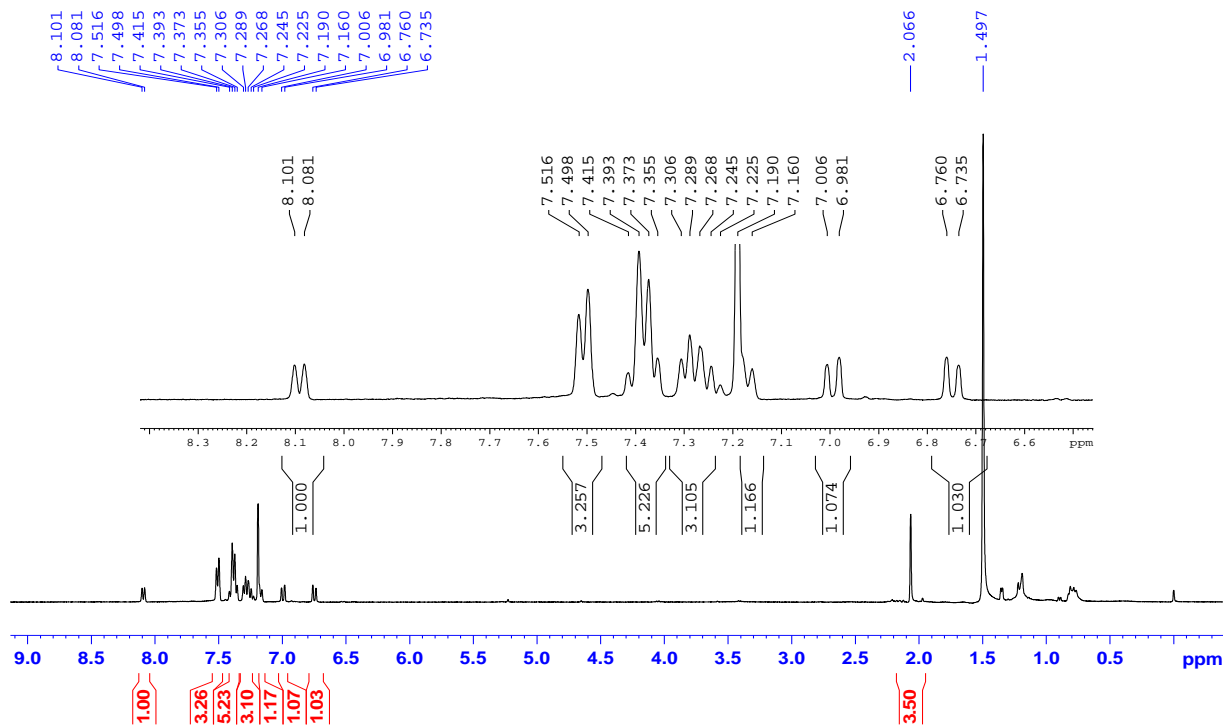

Signature SIF VIT VELLORE  
MA-PH-BIPHE-PROP-OL

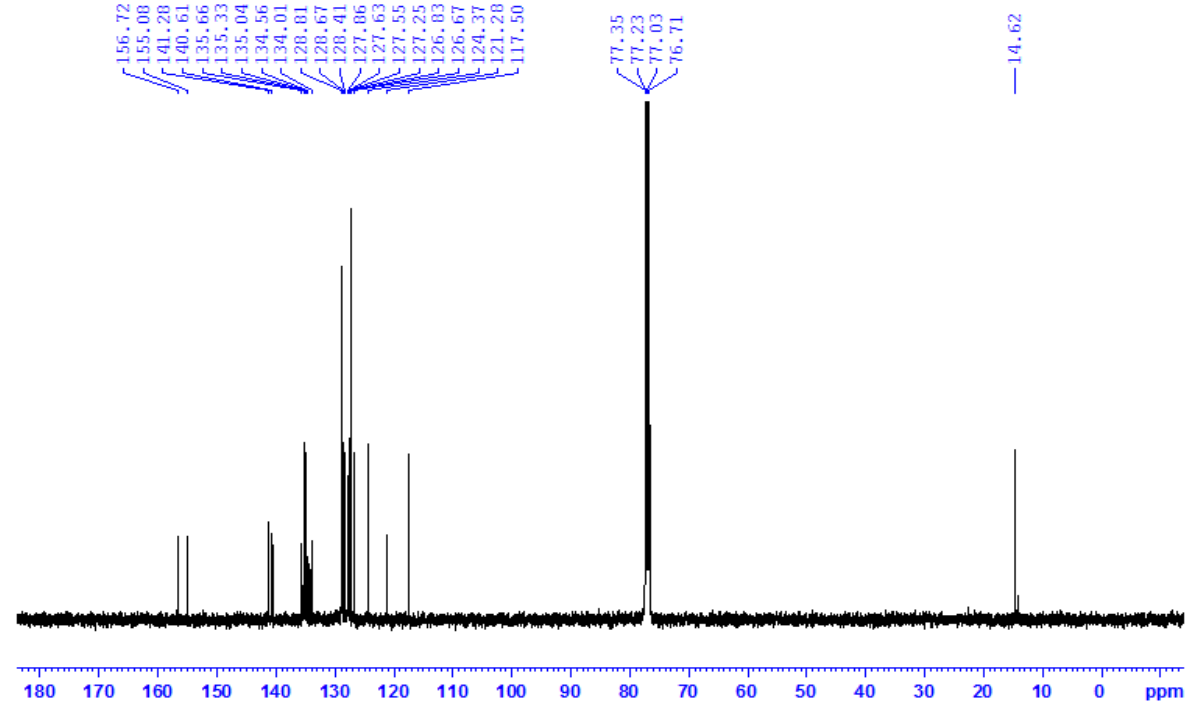

# <sup>1</sup>H NMR and <sup>13</sup>C NMR of 5ba

Signature SIF VIT VELLORE  
4MEPH-PH-PROP-OL

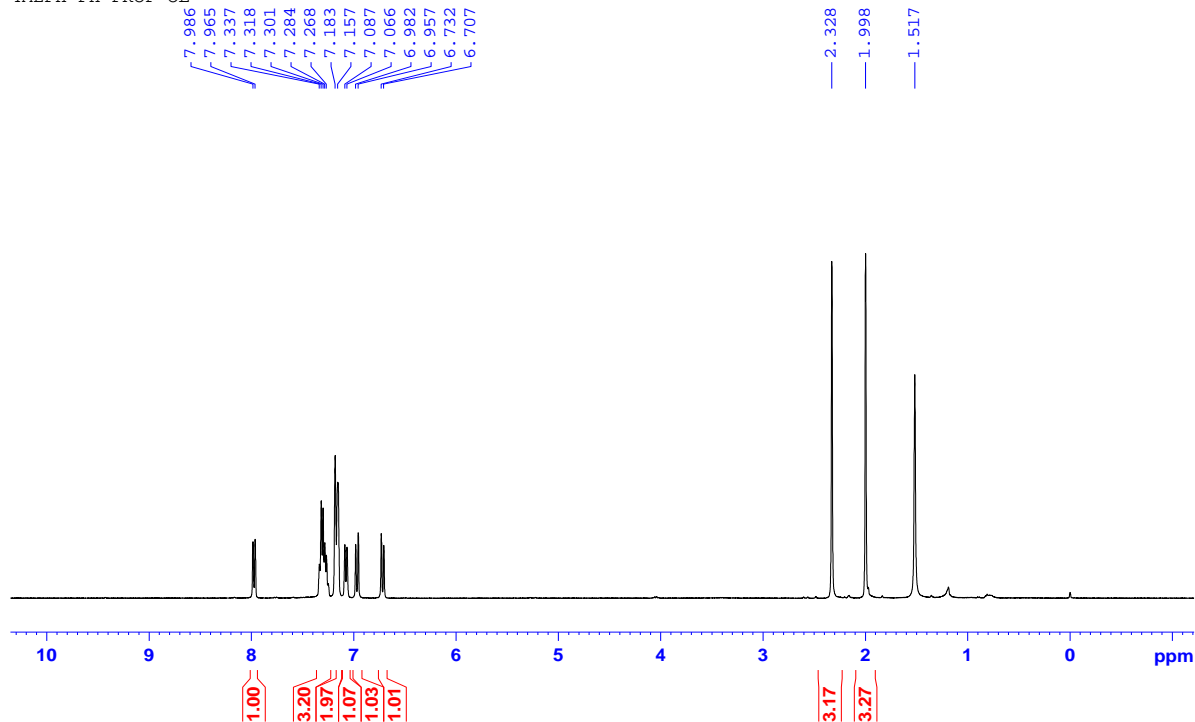

Signature SIF VIT VELLORE  
4MEPH-PH-PROP-OL

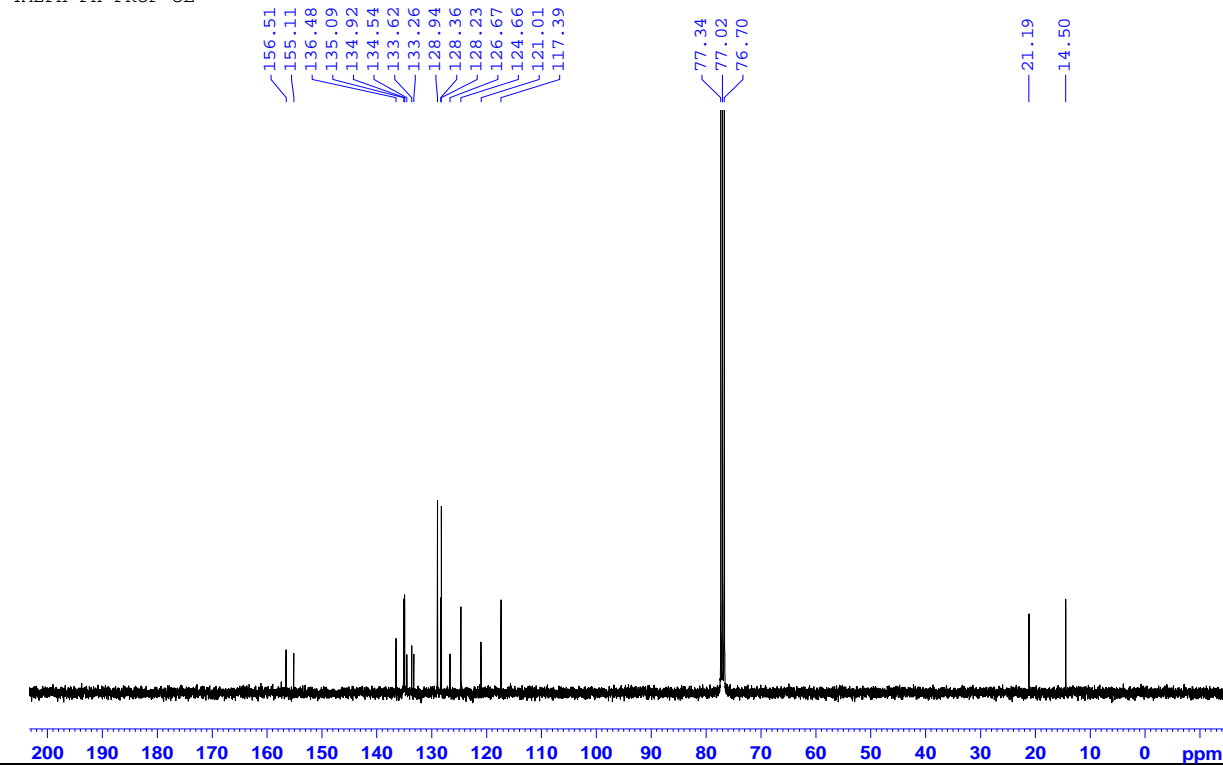

# <sup>1</sup>H NMR and <sup>13</sup>C NMR of 5bj

Signature SIF VIT VELLORE  
4MEMA-NAP-PROP-OL

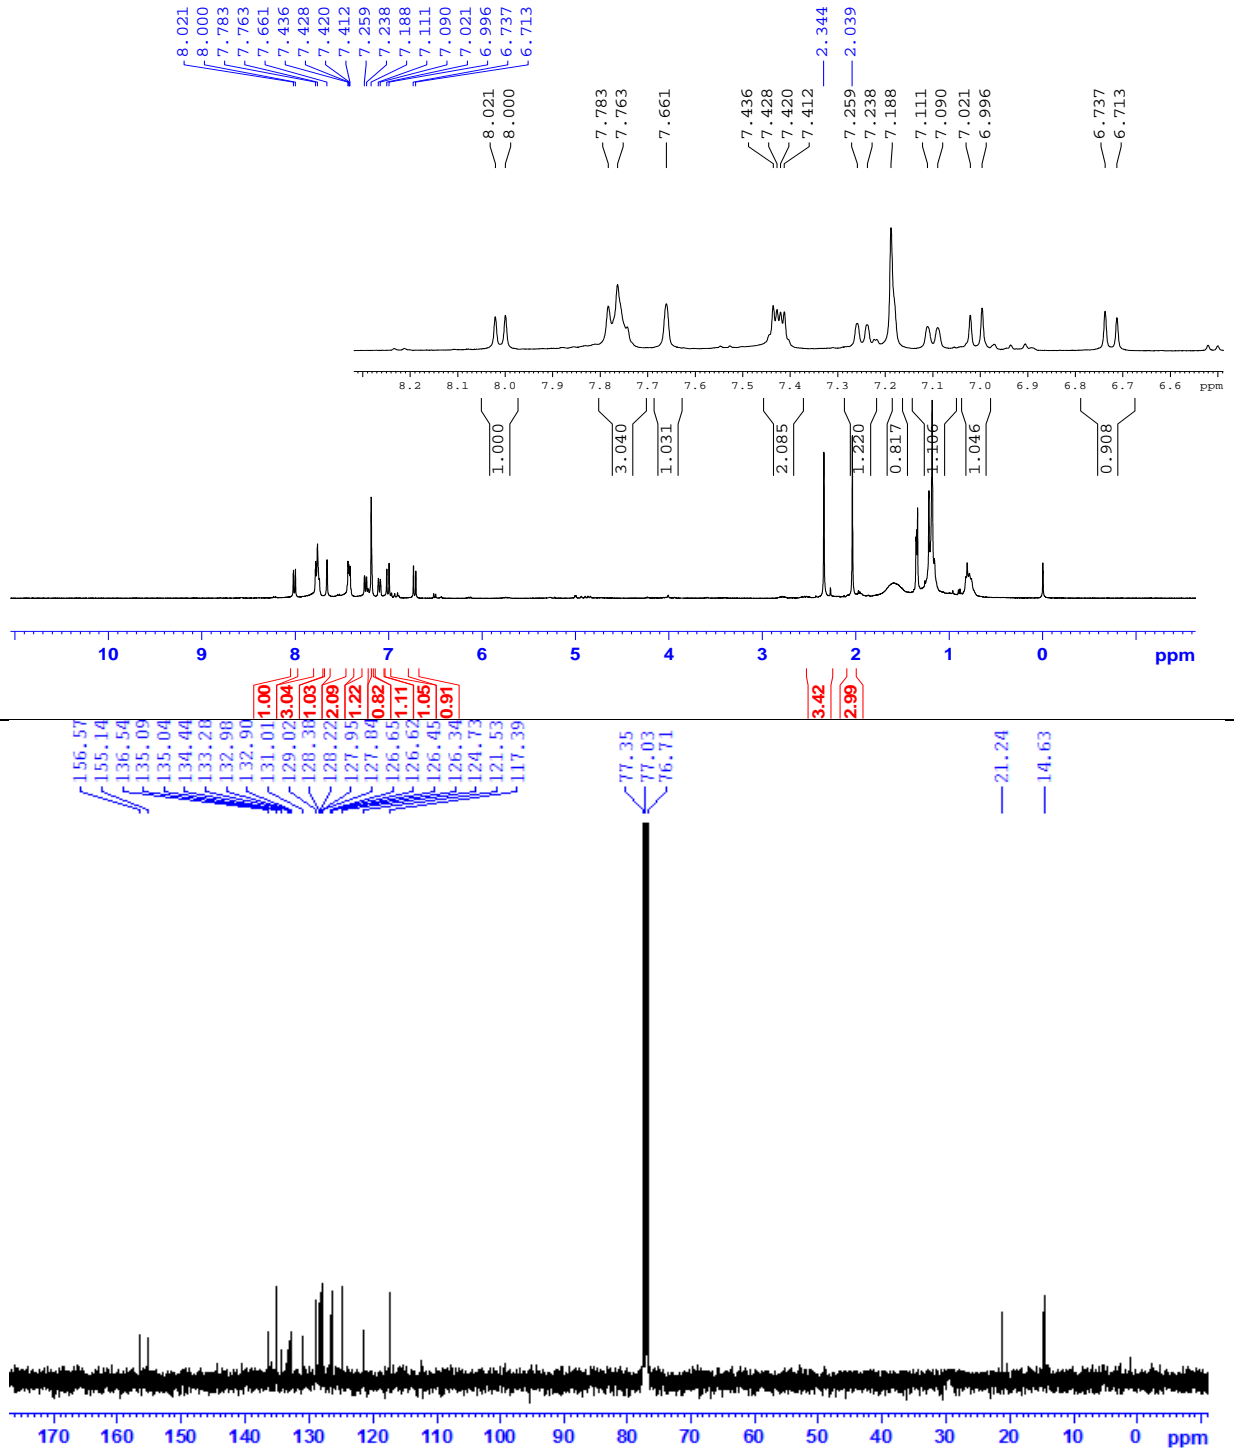

<sup>1</sup>H NMR and <sup>13</sup>C NMR of **5ca**

Signature SIF VIT VELLORE  
4-F-MA-PH-PROP-OL

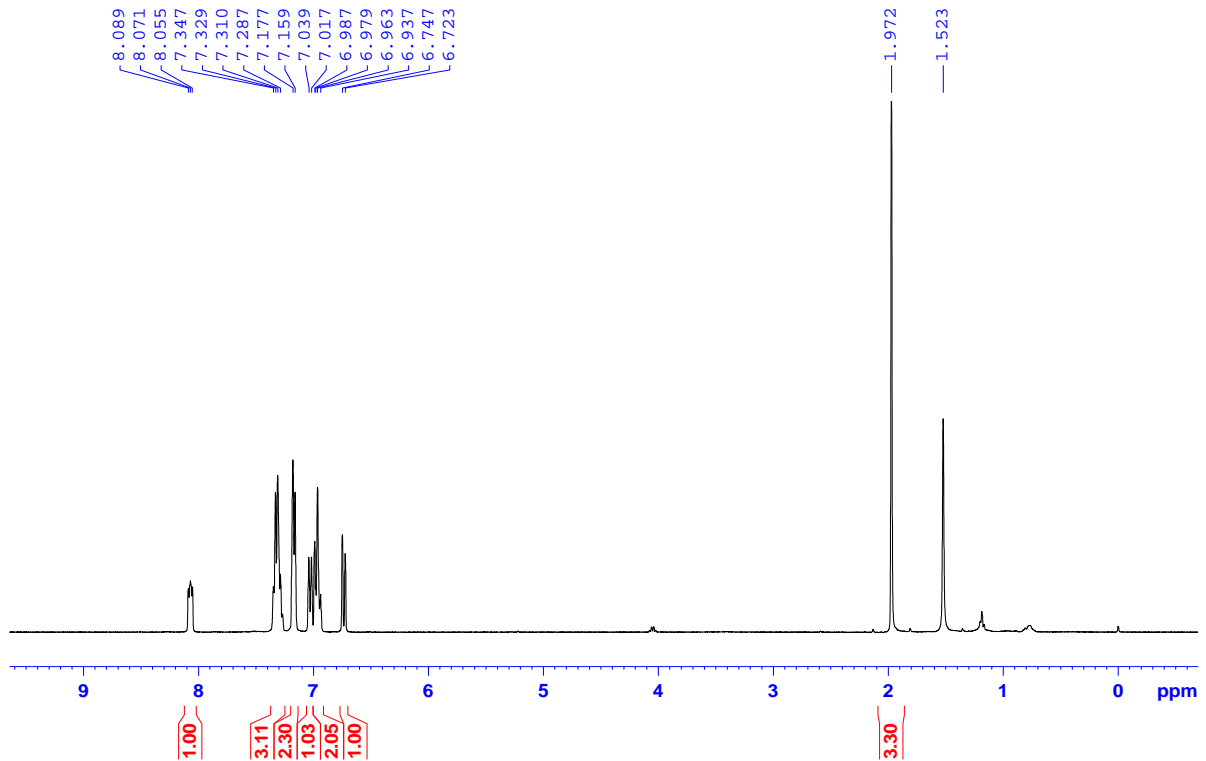

Signature SIF VIT VELLORE  
4-F-MA-PH-PROP-OL

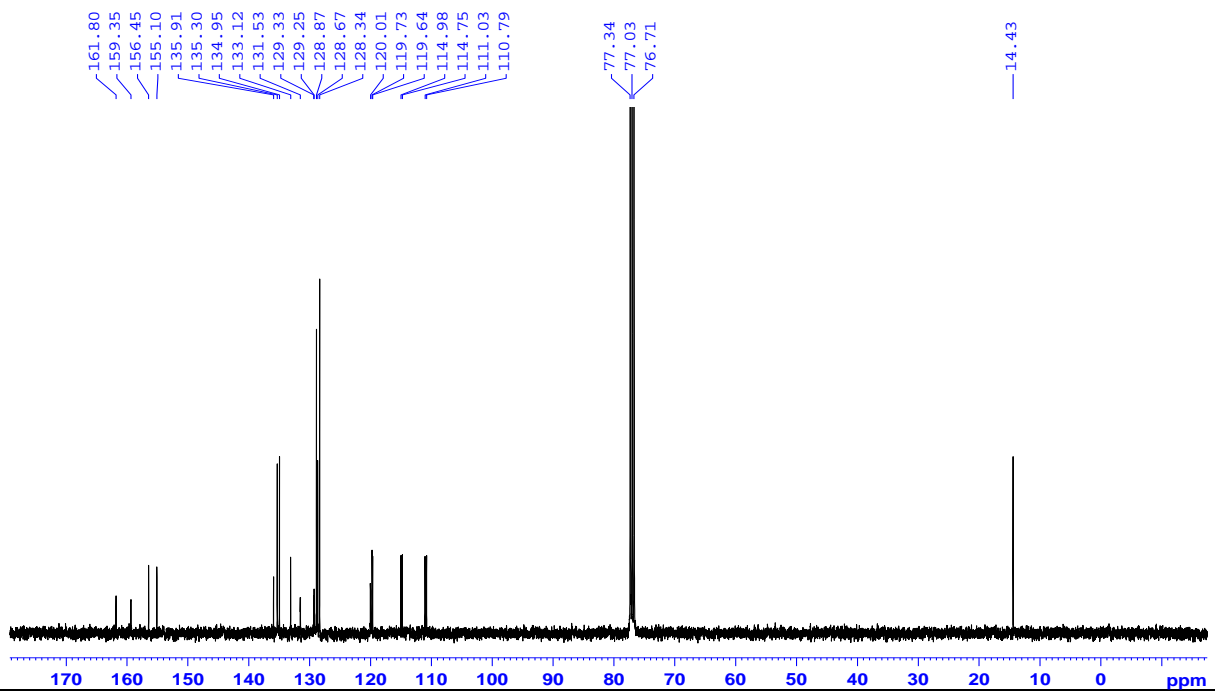

<sup>19</sup>F NMR of **5ca**

Signature SIF VIT VELLORE  
4-F-MA-PH-PROP-OL

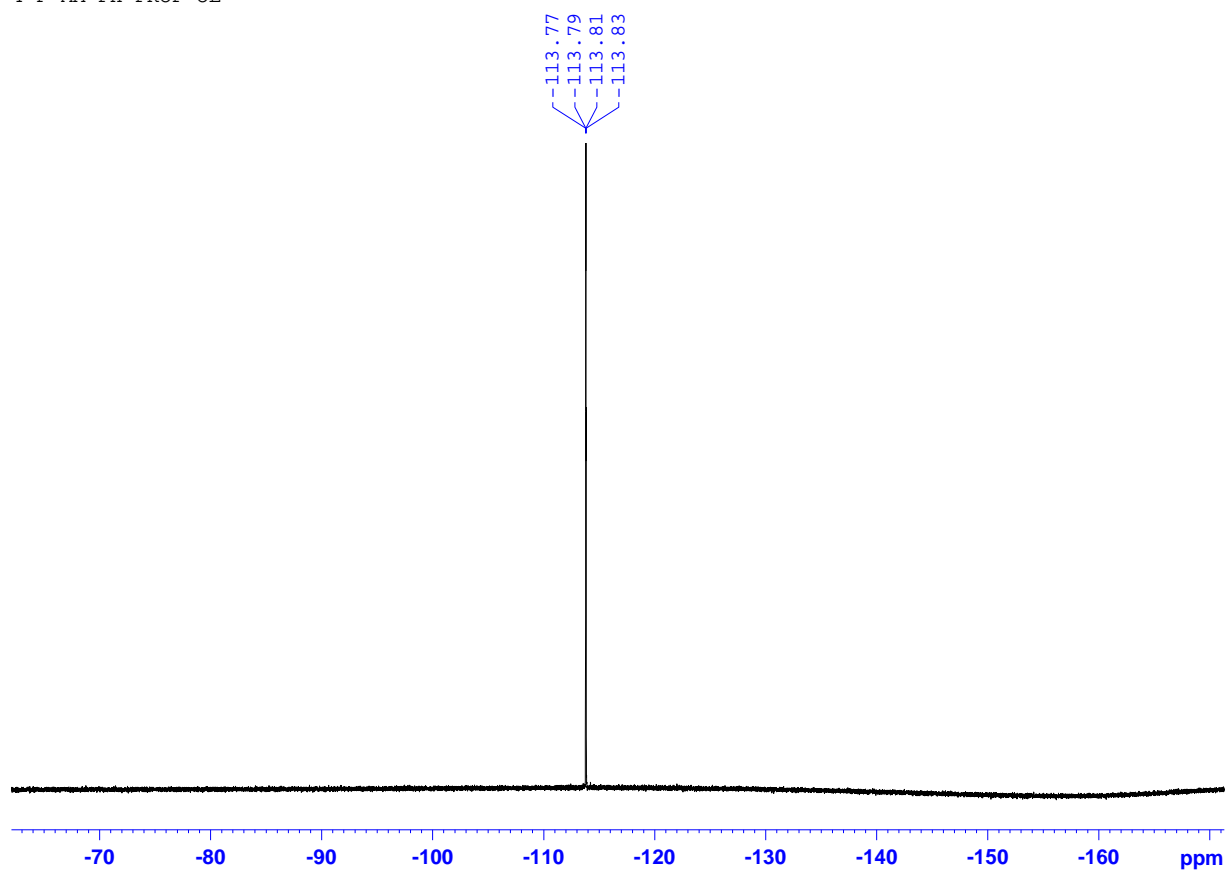

# <sup>1</sup>H NMR and <sup>13</sup>C NMR of 5da

Signature SIF VIT VELLORE  
4CL-MA-PH-PROP-OL

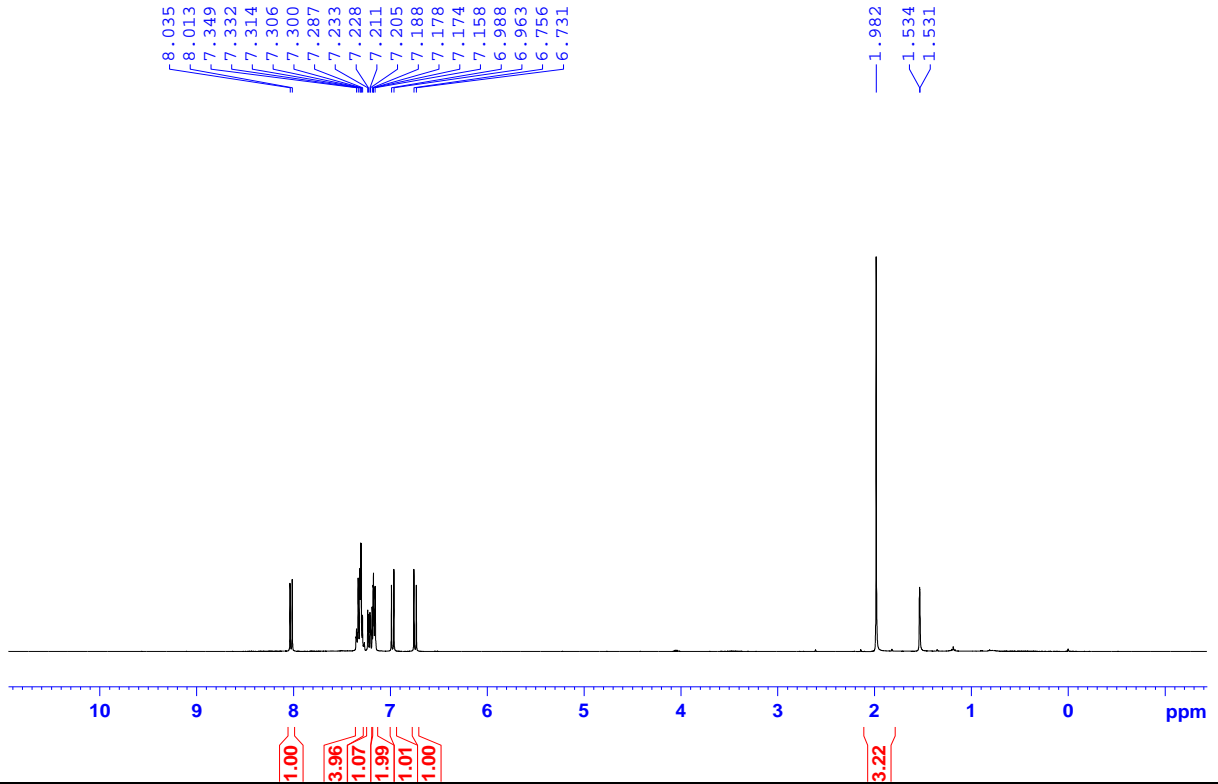

Signature SIF VIT VELLORE  
4CL-MA-PH-PROP-OL

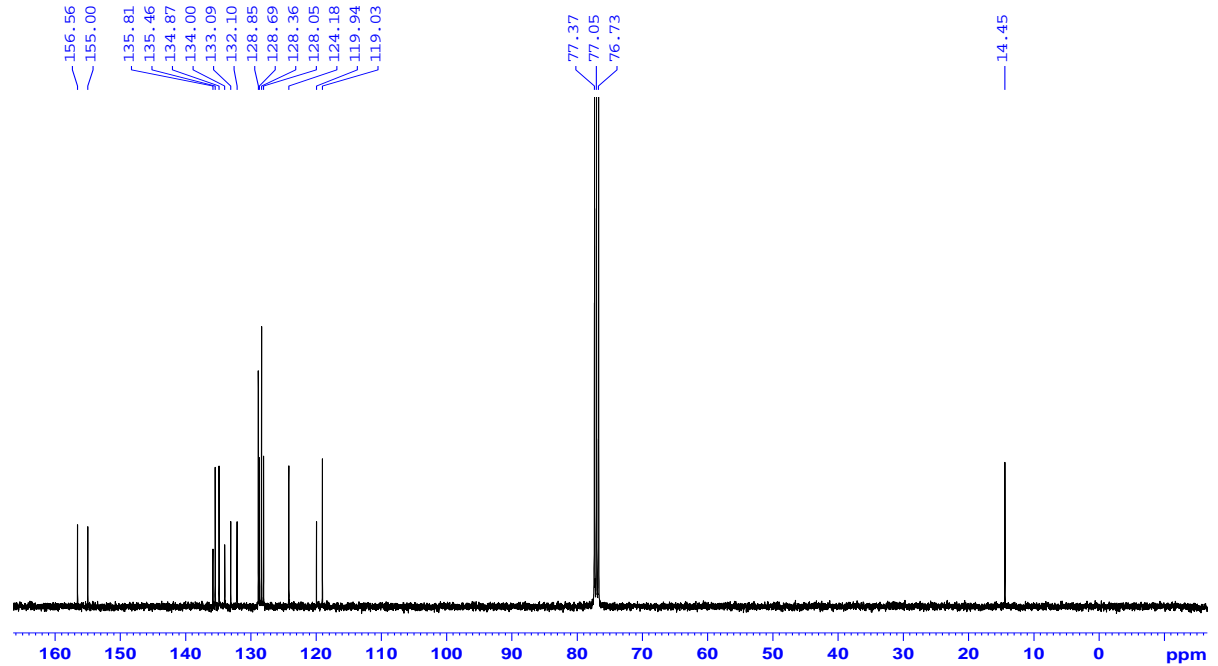

# <sup>1</sup>H NMR and <sup>13</sup>C NMR of **5a**

Signature SIF VIT VELLORE  
4BR-MA-PH-PROP-OL-T

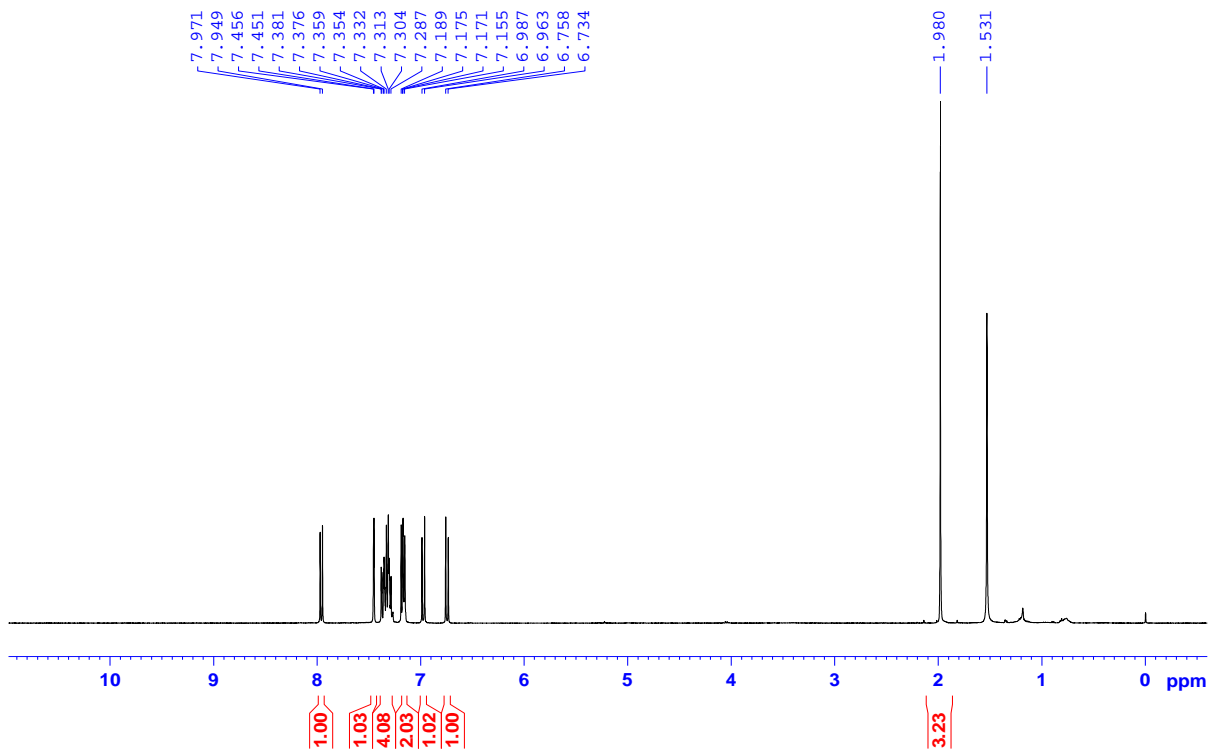

Signature SIF VIT VELLORE  
4BR-MA-PH-PROP-OL-T

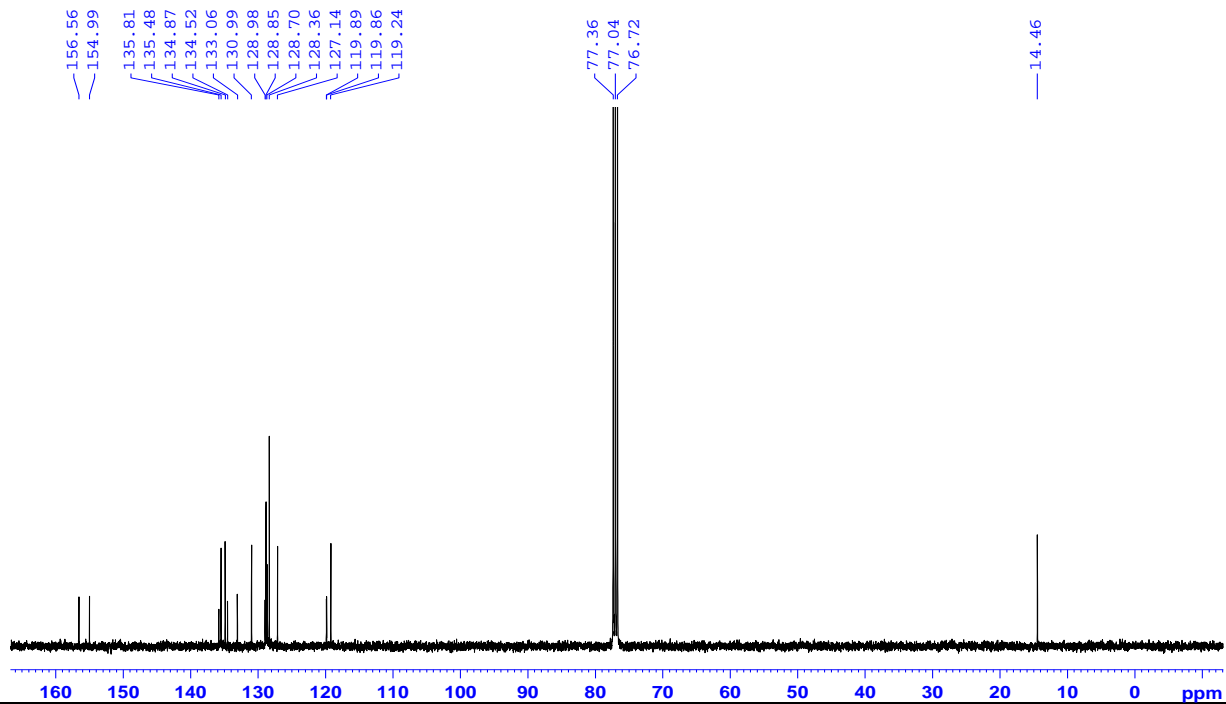

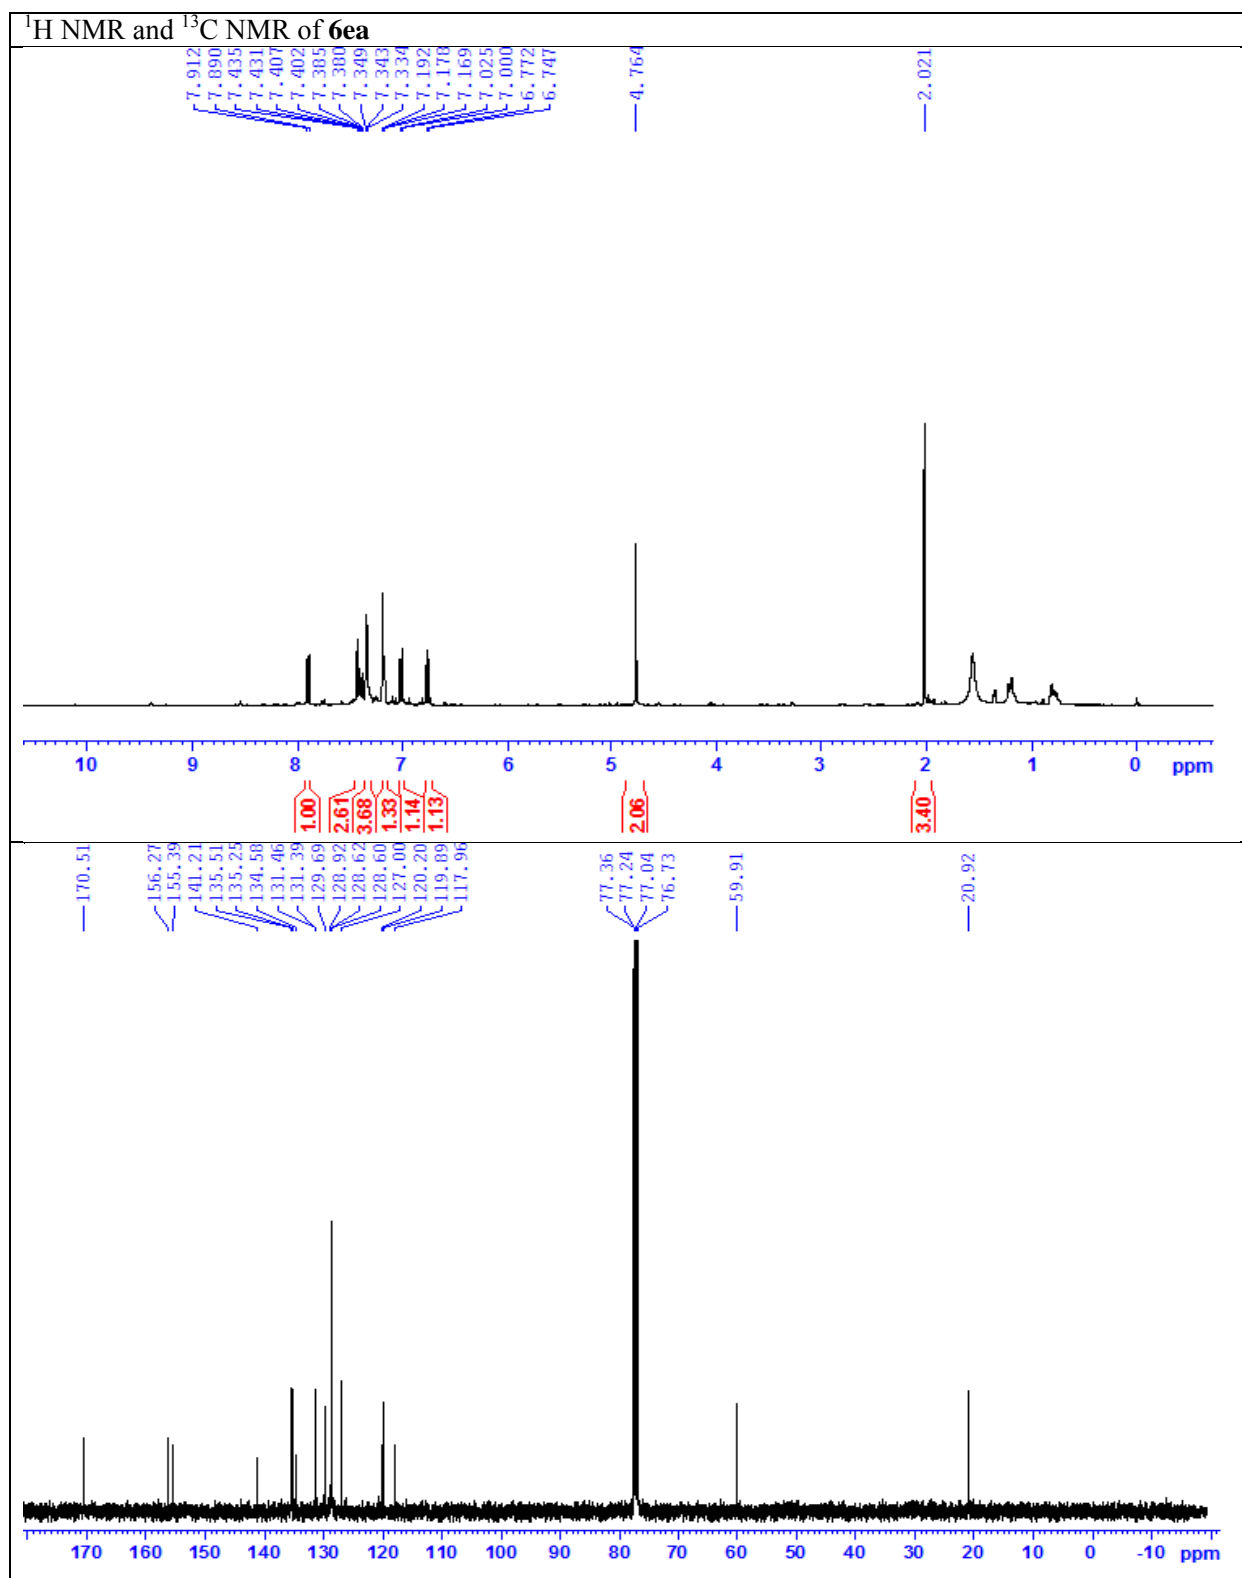



# <sup>1</sup>H NMR and <sup>13</sup>C NMR of 5cf

Signature SIF VIT VELLORE  
4F-MA-PH-3F-PROP-OL

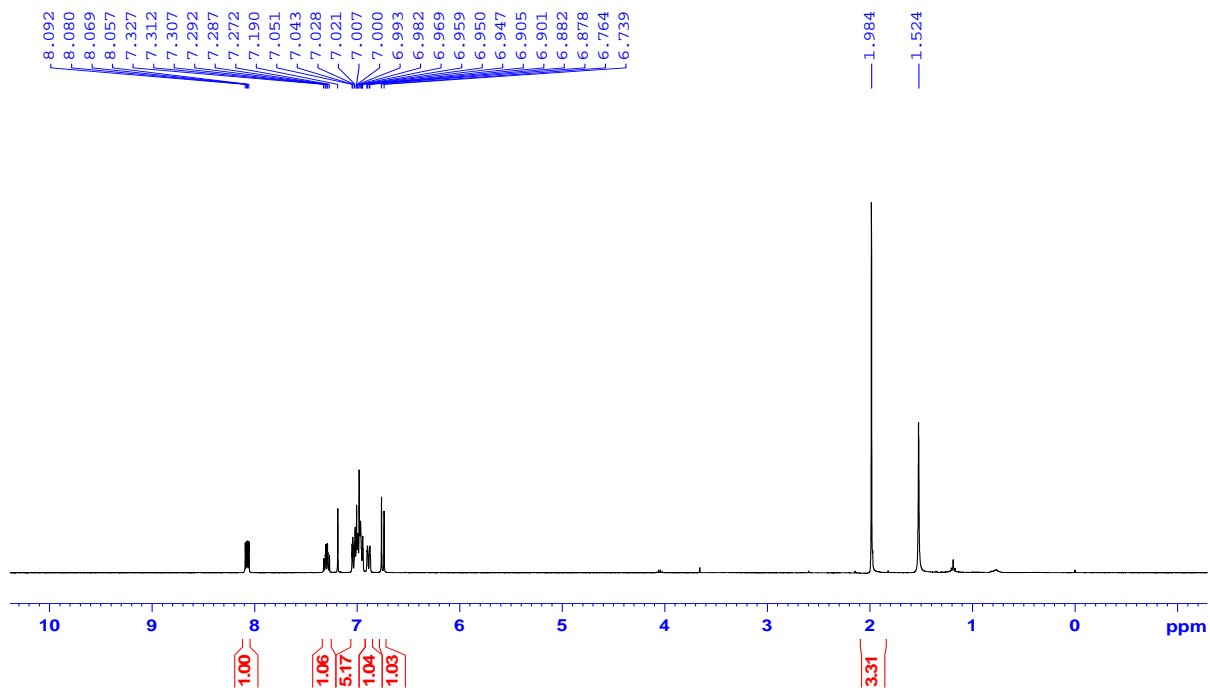

Signature SIF VIT VELLORE  
4F-MA-PH-3F-PROP-OL

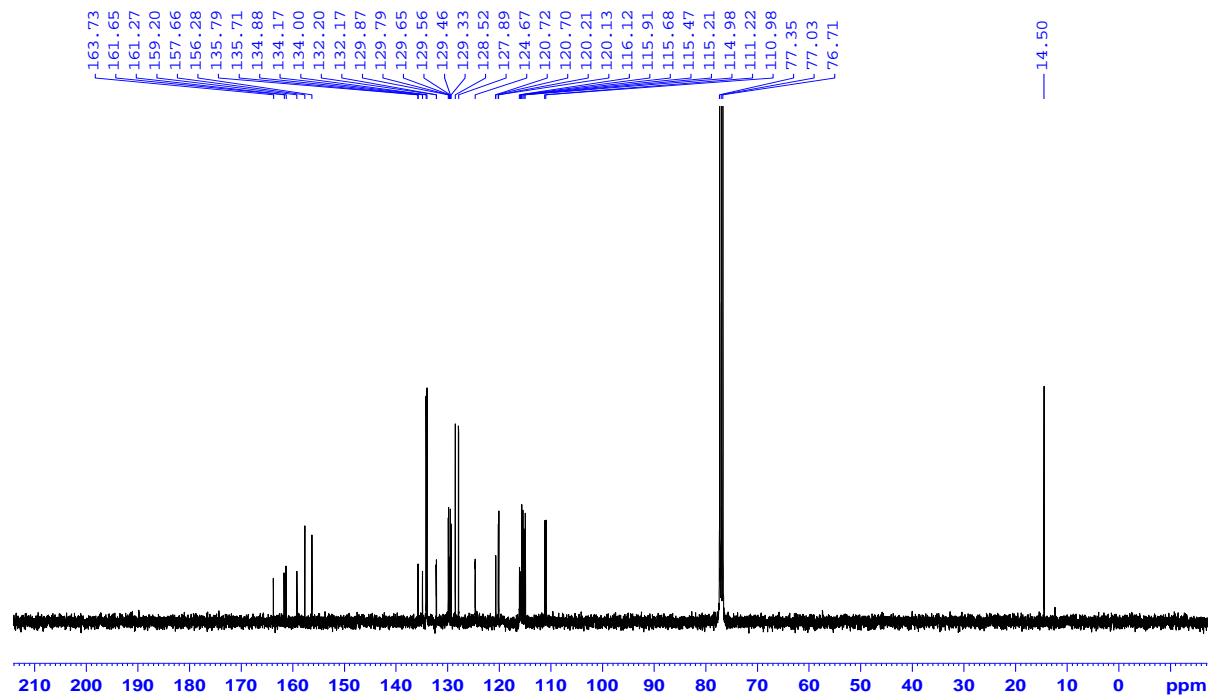

$^{19}\text{F}$  NMR of **5cf**

Signature SIF VIT VELLORE  
4F-MA-PH-3F-PROP-OL

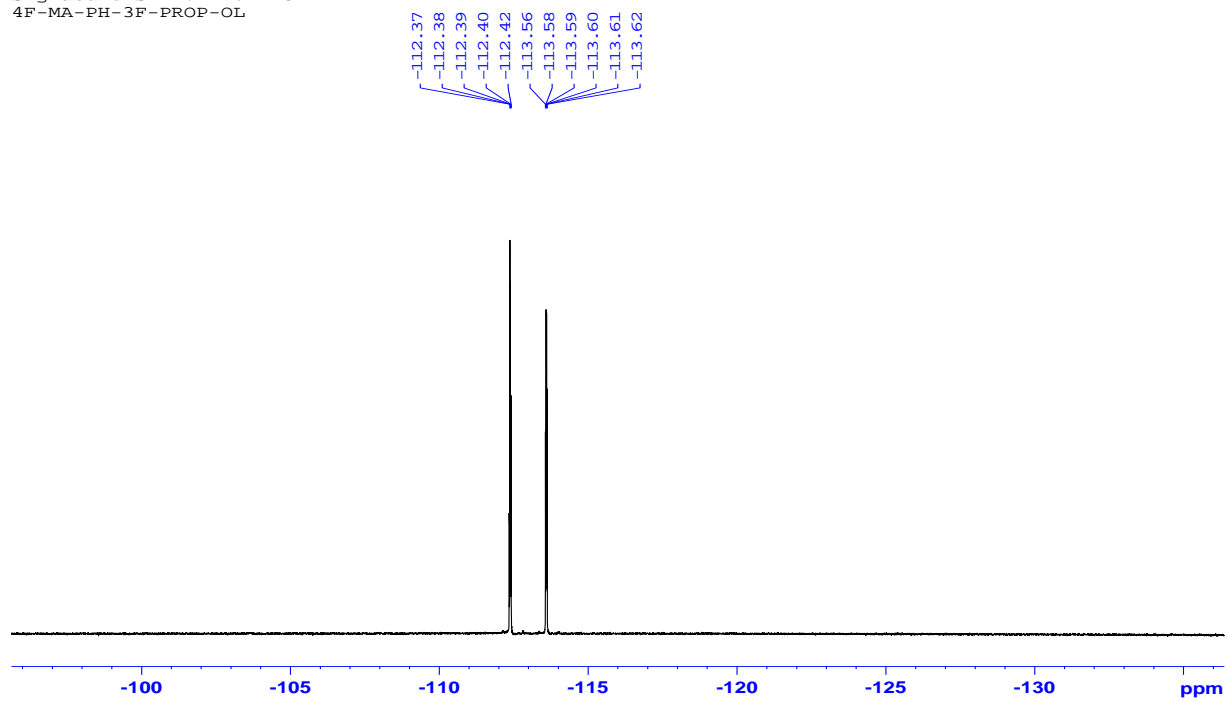

# <sup>1</sup>H NMR and <sup>13</sup>C NMR of 5ha

Signature SIF VIT VELLORE  
3BR-MA-PH-PROP-OL

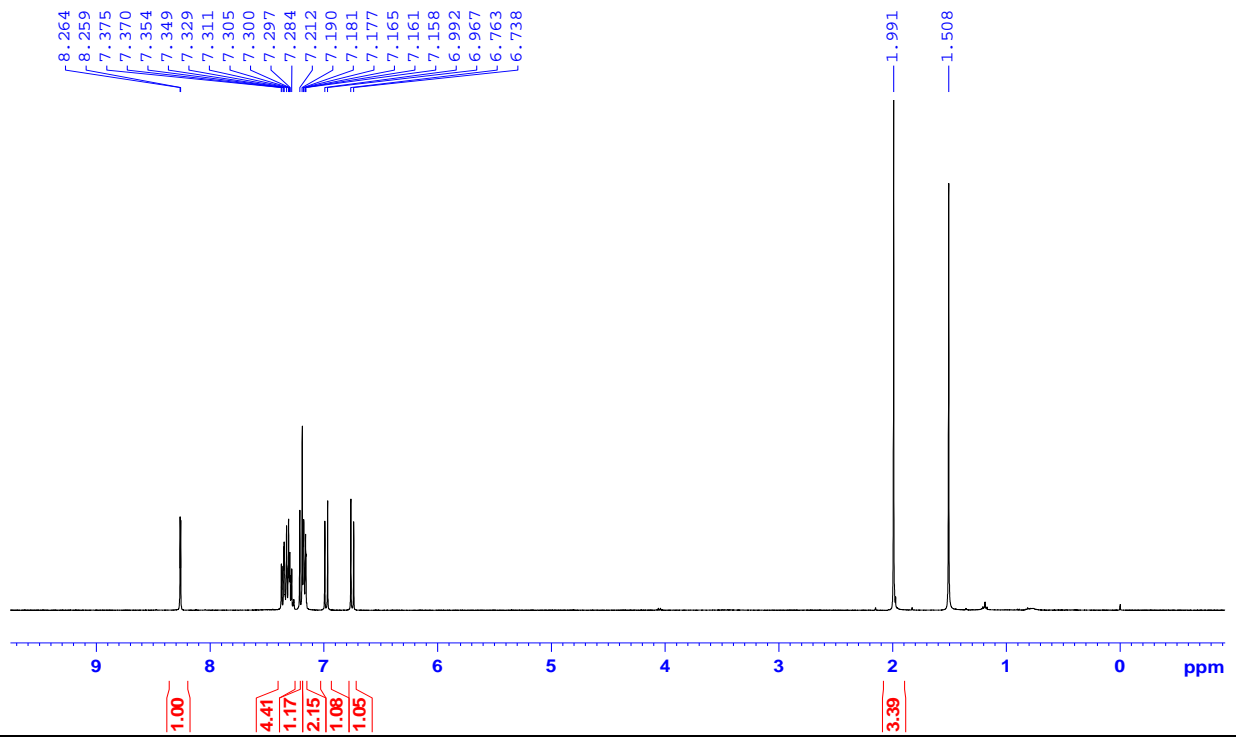

Signature SIF VIT VELLORE  
3BR-MA-PH-PROP-OL

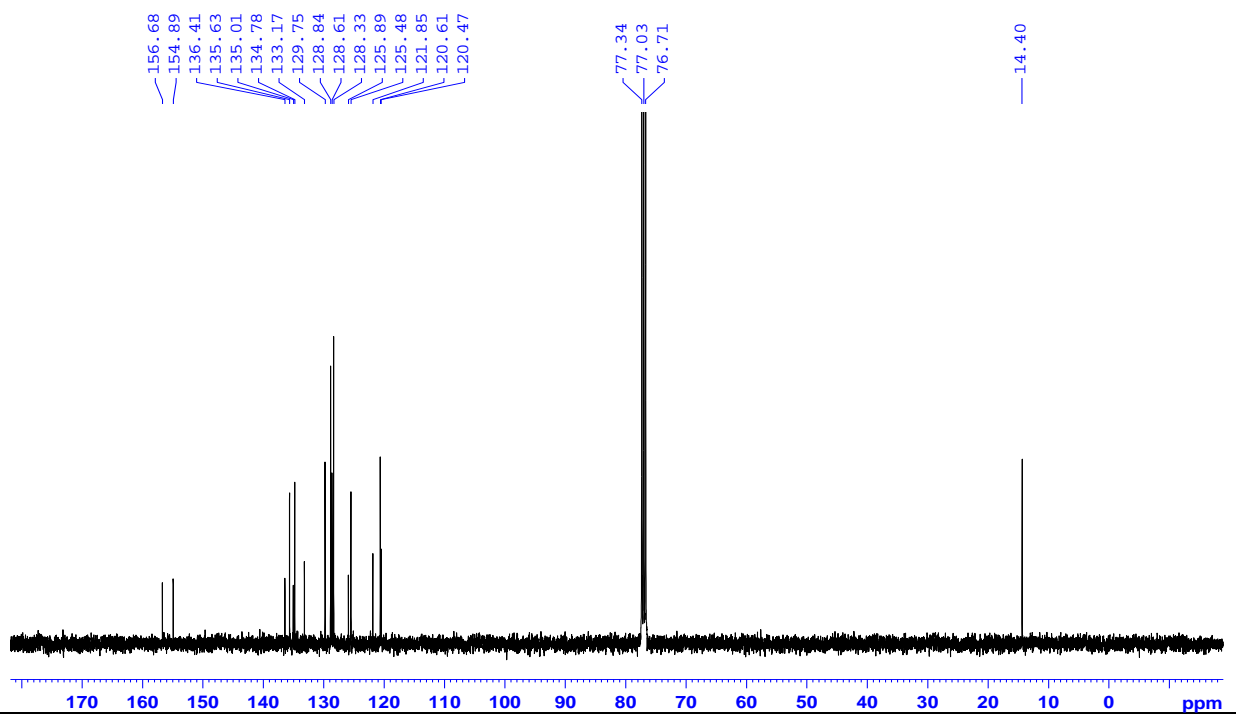

# <sup>1</sup>H NMR and <sup>13</sup>C NMR of 5ia

Signature SIF VIT VELLORE  
3NO2-MA-PH-PROP-OL

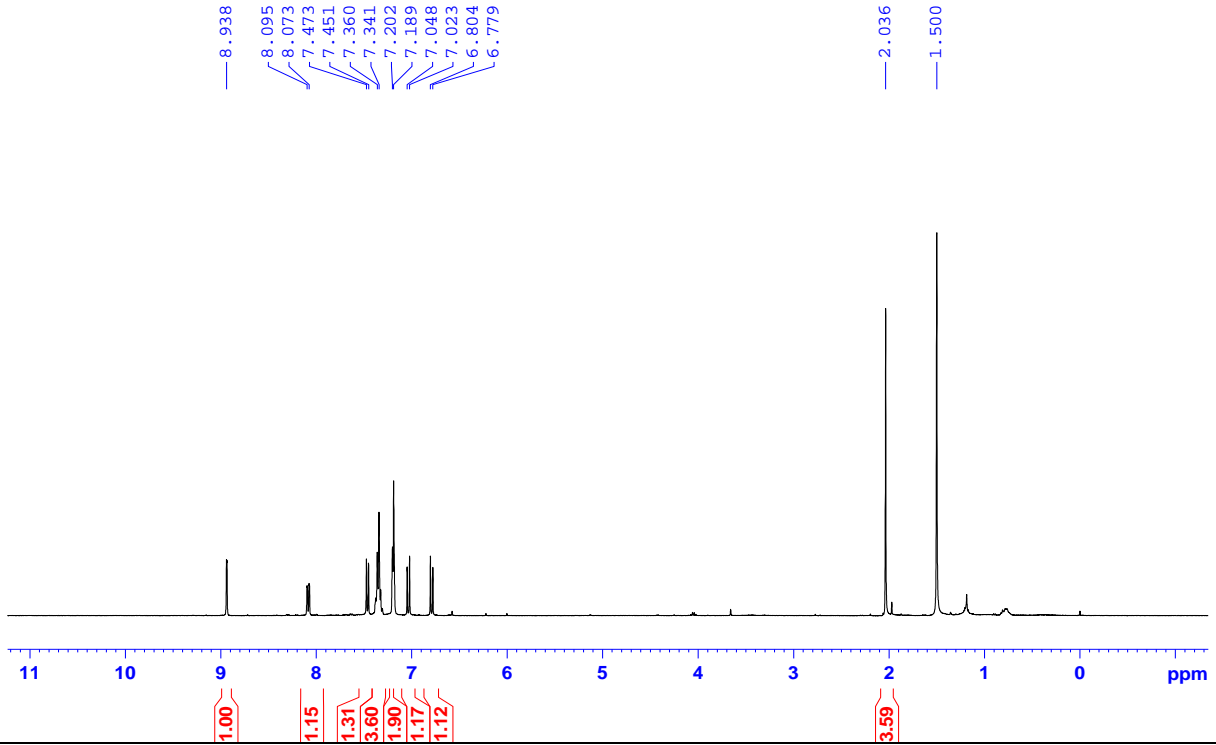

Signature SIF VIT VELLORE  
3NO2-MA-PH-PROP-OL

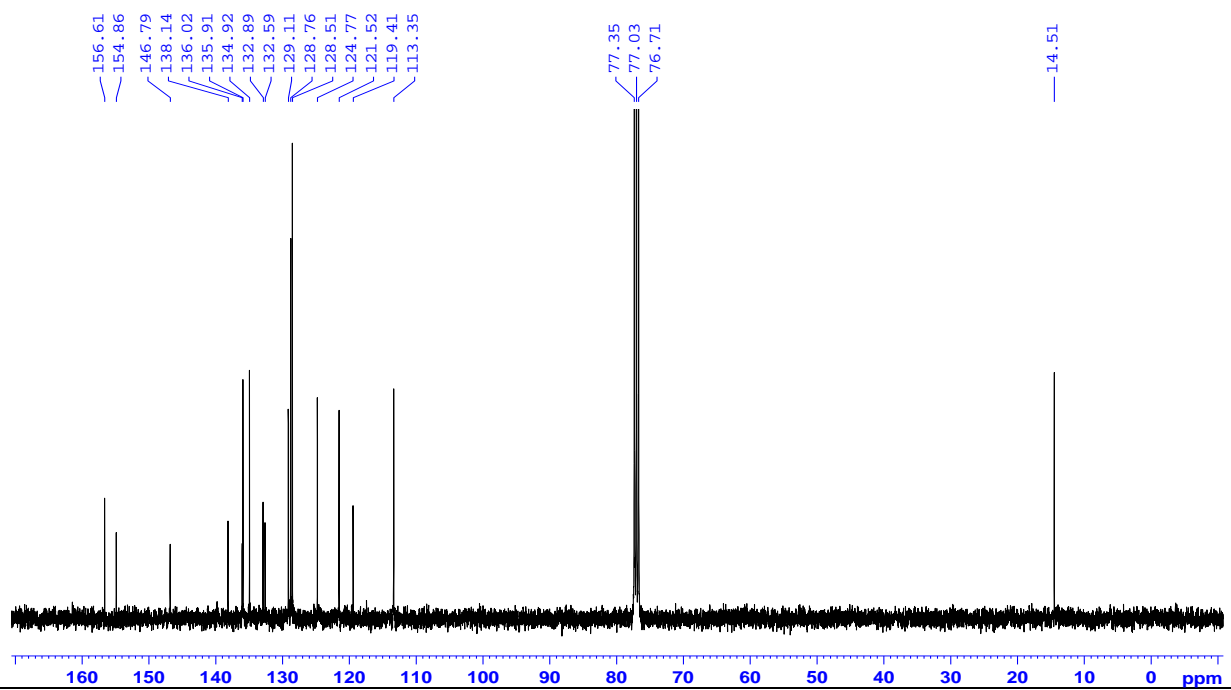

# <sup>1</sup>H NMR and <sup>13</sup>C NMR of 7al

Signature SIF VIT VELLORE  
PH-PTHA-SEC-BPH-PROP

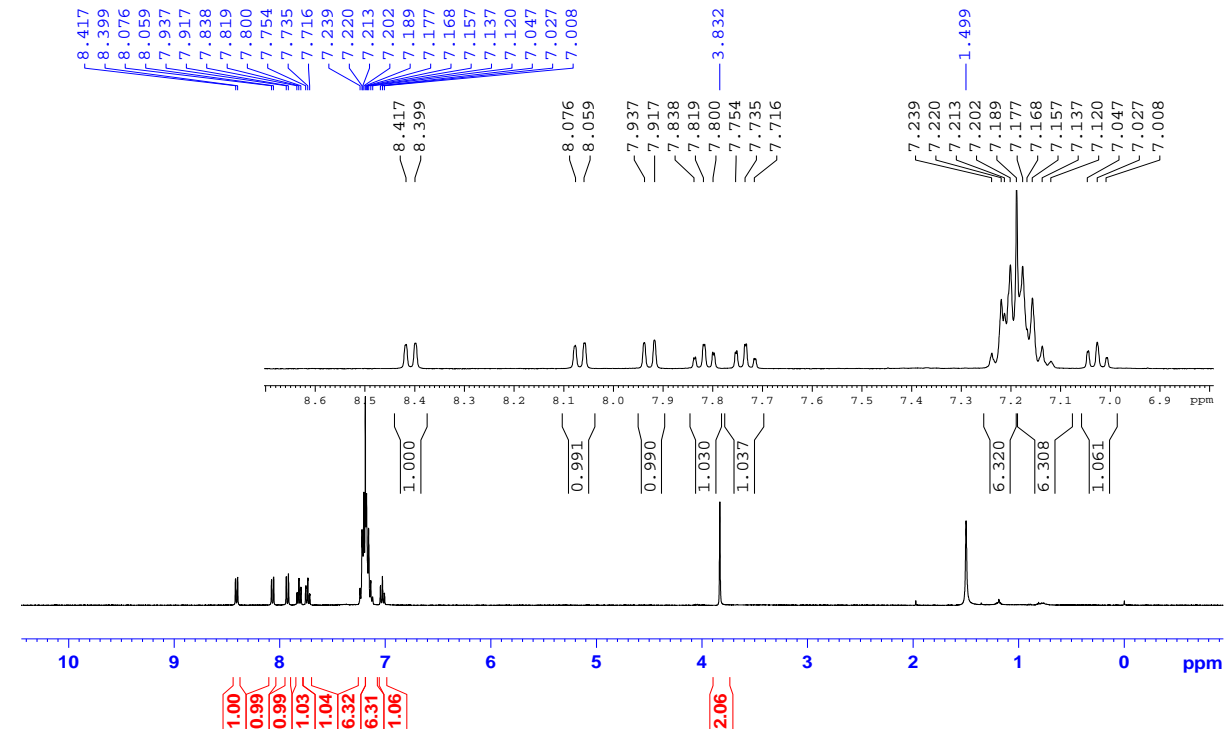

Signature SIF VIT VELLORE  
PH-PTHA-SEC-BPH-PROP

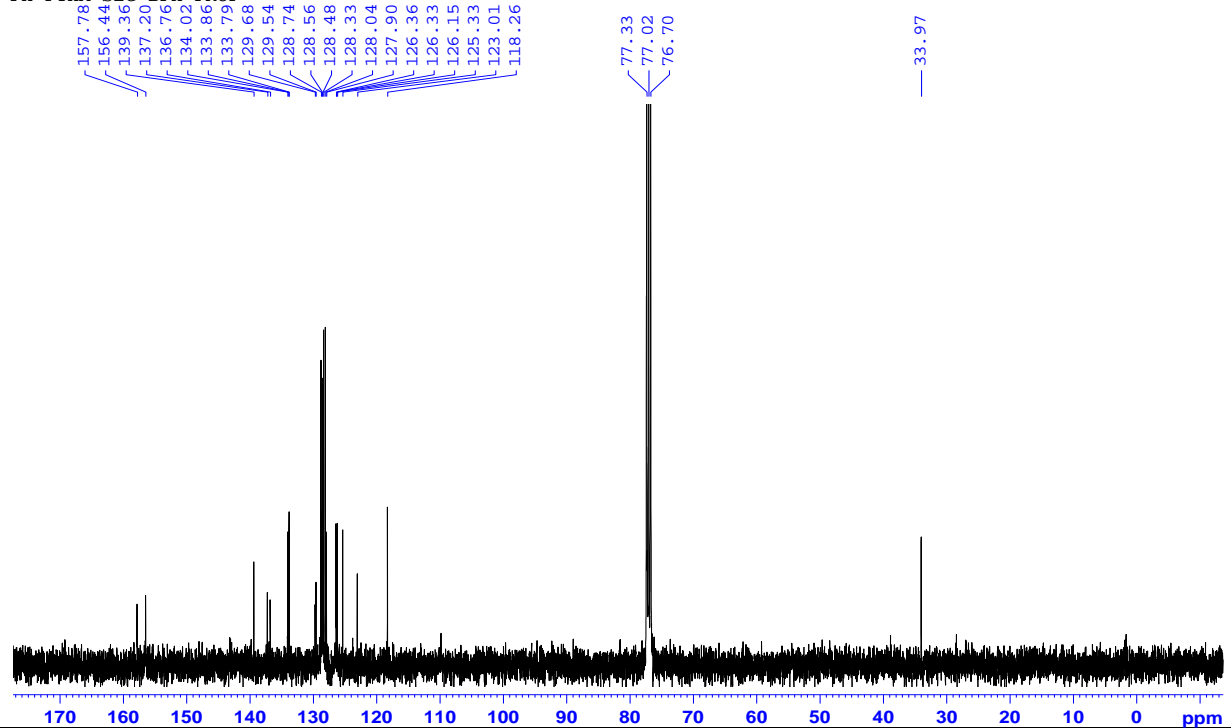

# <sup>1</sup>H NMR and <sup>13</sup>C NMR of 7am

Signature SIF VIT VELLORE

PH-PTHA-4F-SEC-PROP-OL

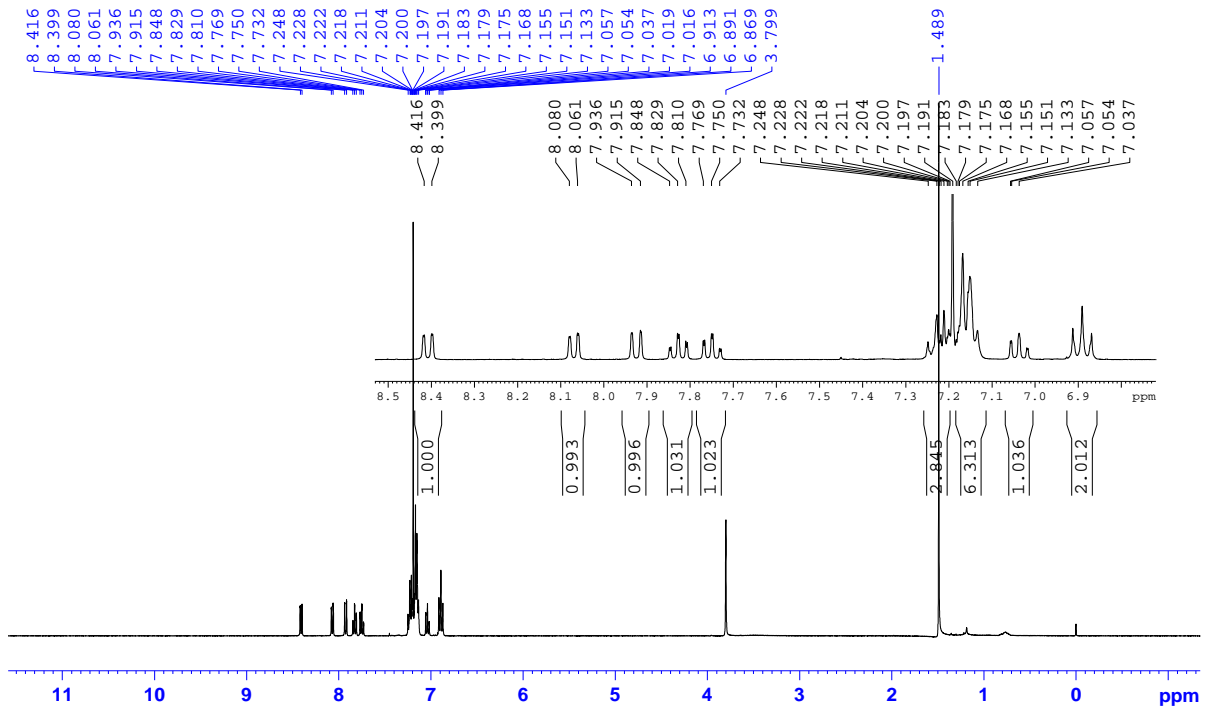

Signature SIF VIT VELLORE

PH-PTHA-4F-SEC-PROP-OL

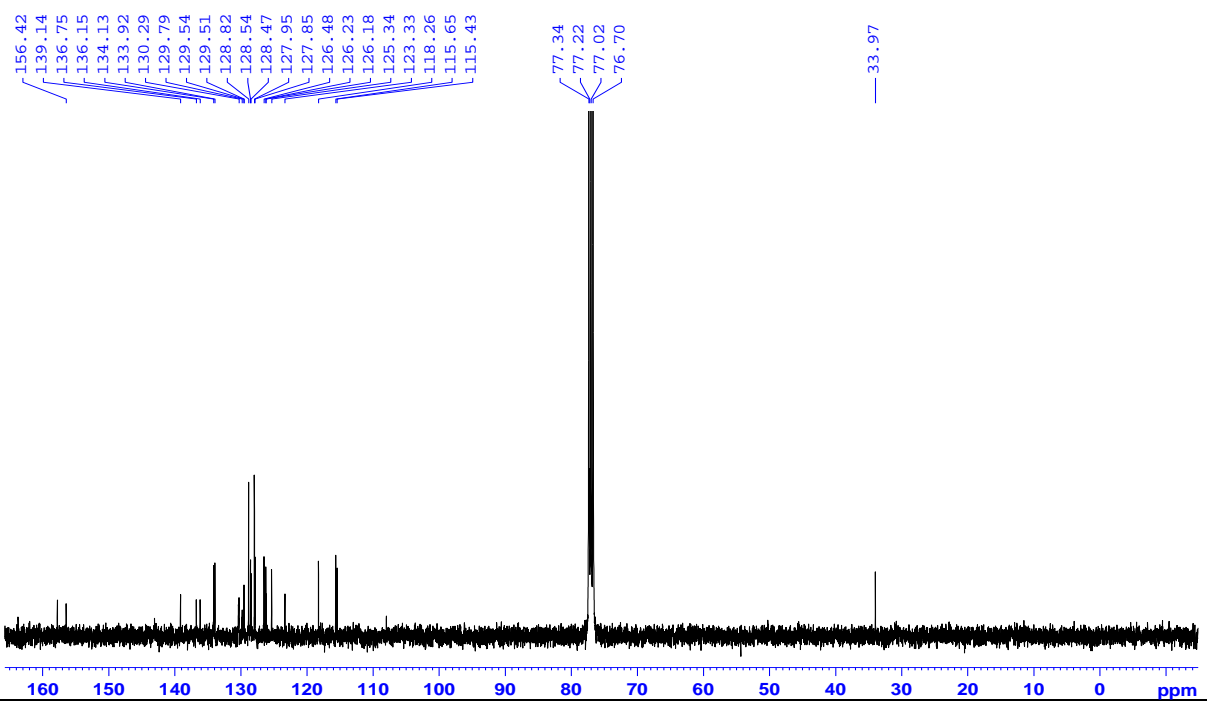

<sup>19</sup>F NMR of **7am**

Signature SIF VIT VELLORE  
PH-PTHA-4F-SEC-PROP-OL

-111.91  
-111.92  
-111.93  
-111.95  
-111.96

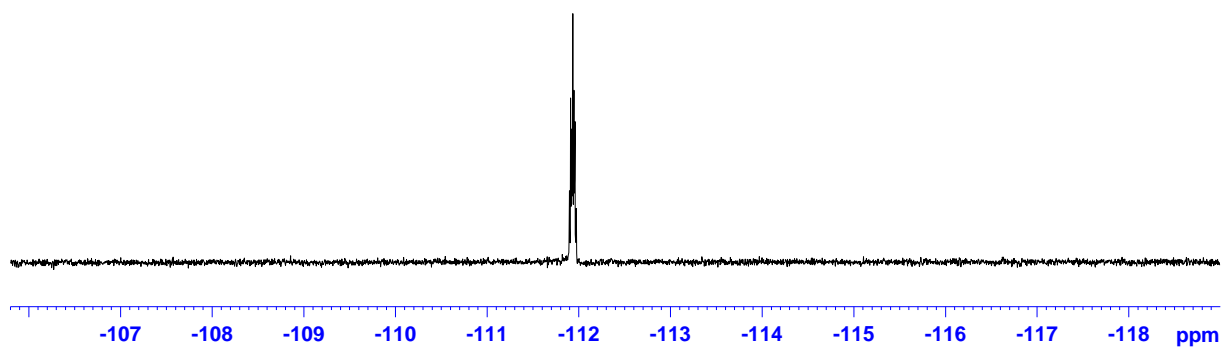

# <sup>1</sup>H NMR and <sup>13</sup>C NMR of 8al

Signature SIF VIT VELLORE  
MA-PH-SEC-DIPHEPROP

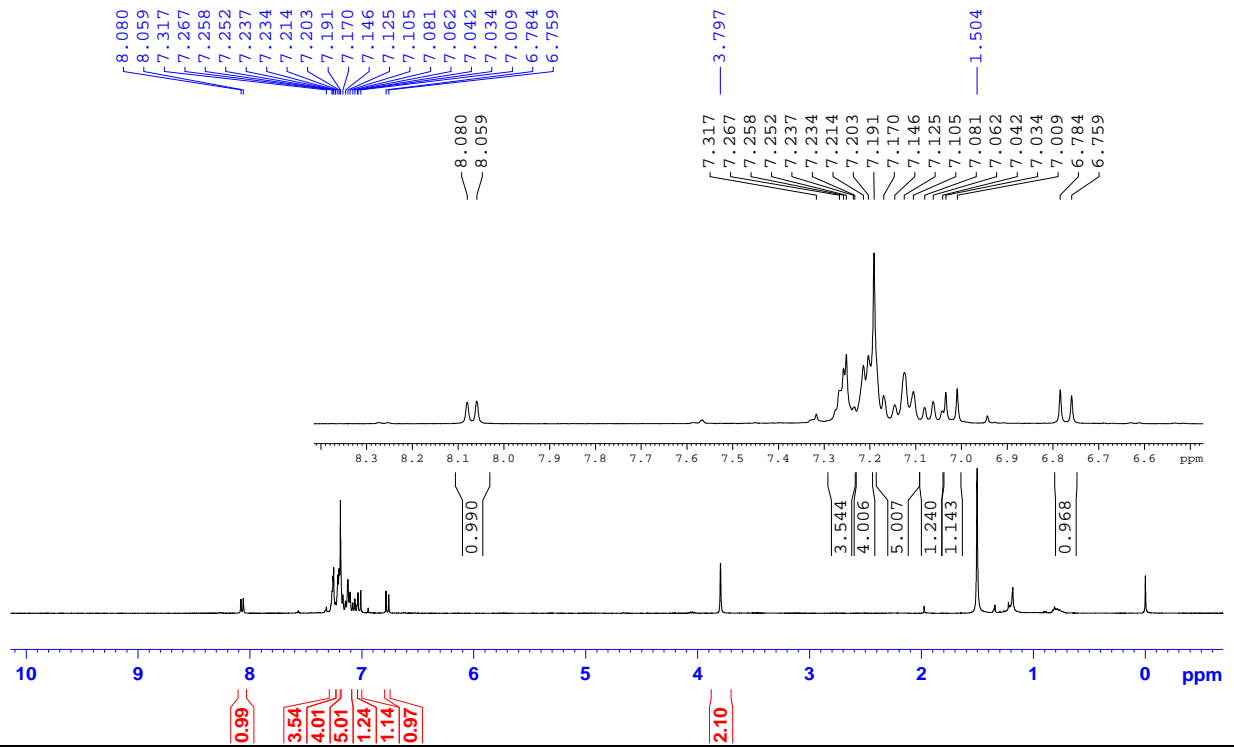

Signature SIF VIT VELLORE  
MA-PH-SEC-DIPHE-PROP

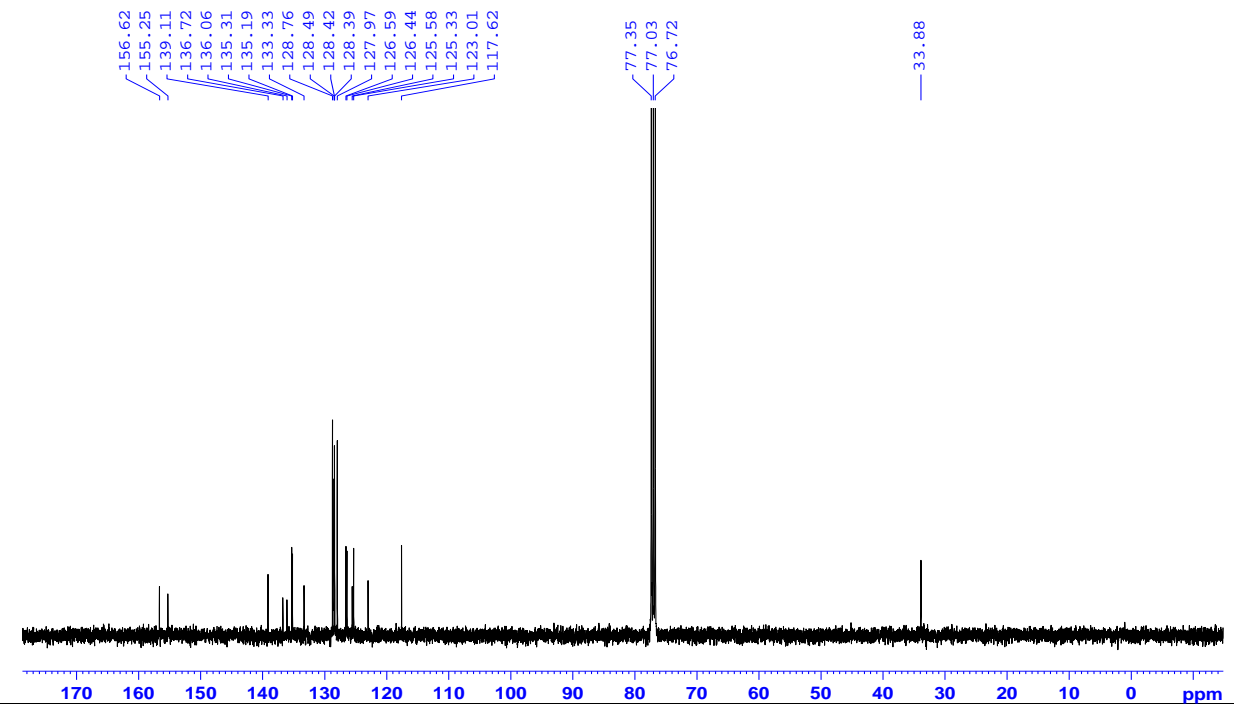



# <sup>1</sup>H NMR and <sup>13</sup>C NMR of 8am

Signature SIF VIT VELLORE  
MA-PH-SEC-PROP-OL

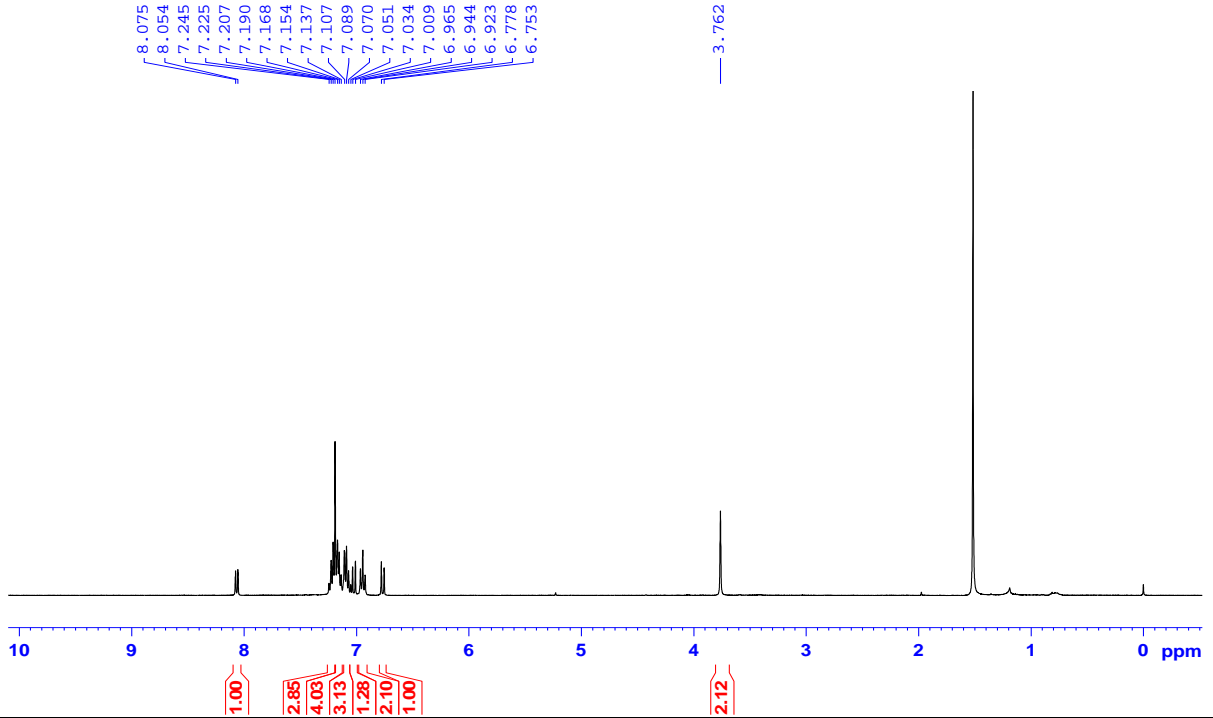

Signature SIF VIT VELLORE  
MA-PH-SEC-PROP-OL

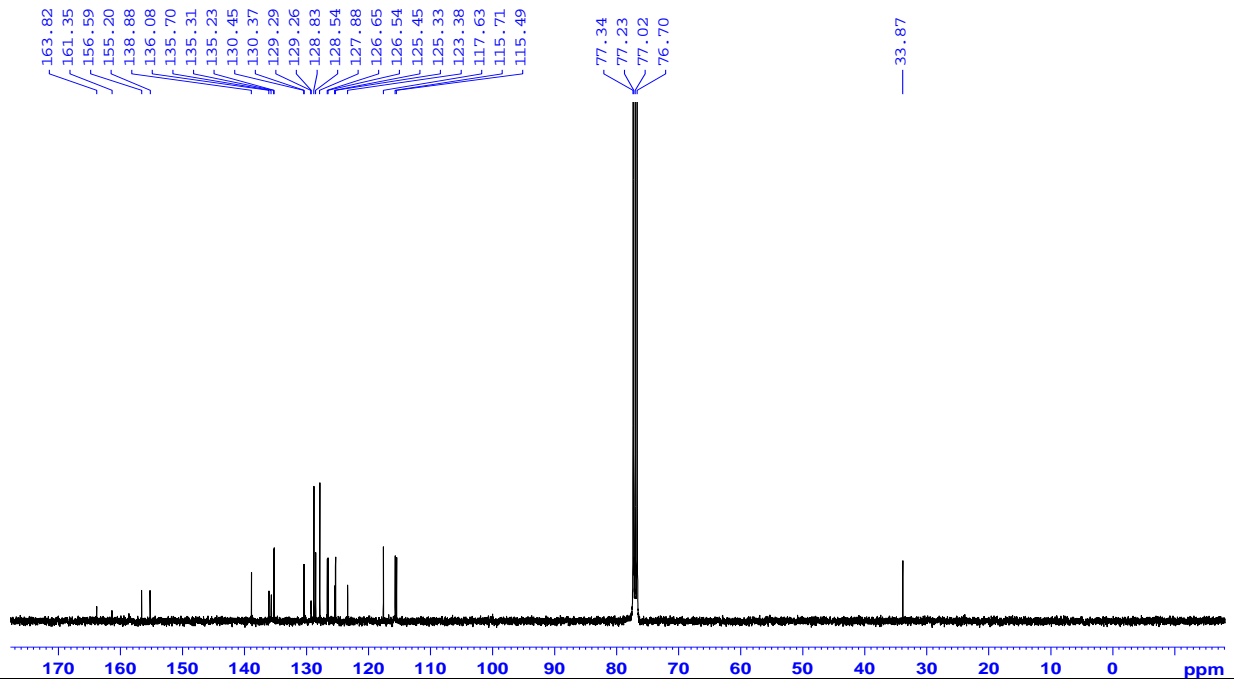

<sup>19</sup>F NMR of **8am**

Signature SIF VIT VELLORE  
MA-PH-SEC-PROP-OL

-111.62  
-111.63  
-111.64  
-111.65  
-111.67  
-111.68  
-111.69  
-111.84  
-117.51

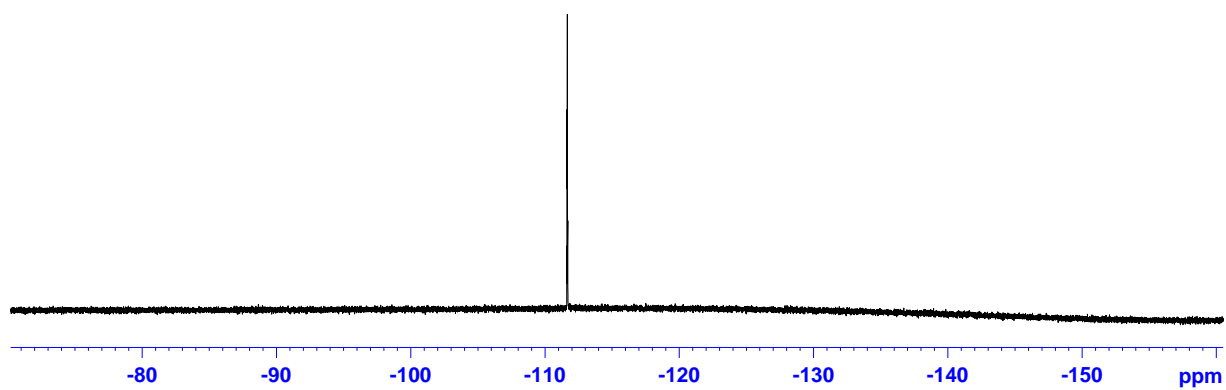

# <sup>1</sup>H NMR and <sup>13</sup>C NMR of 8an

Signature SIF VIT VELLORE  
MA-PH-4CL-SEC-PROP

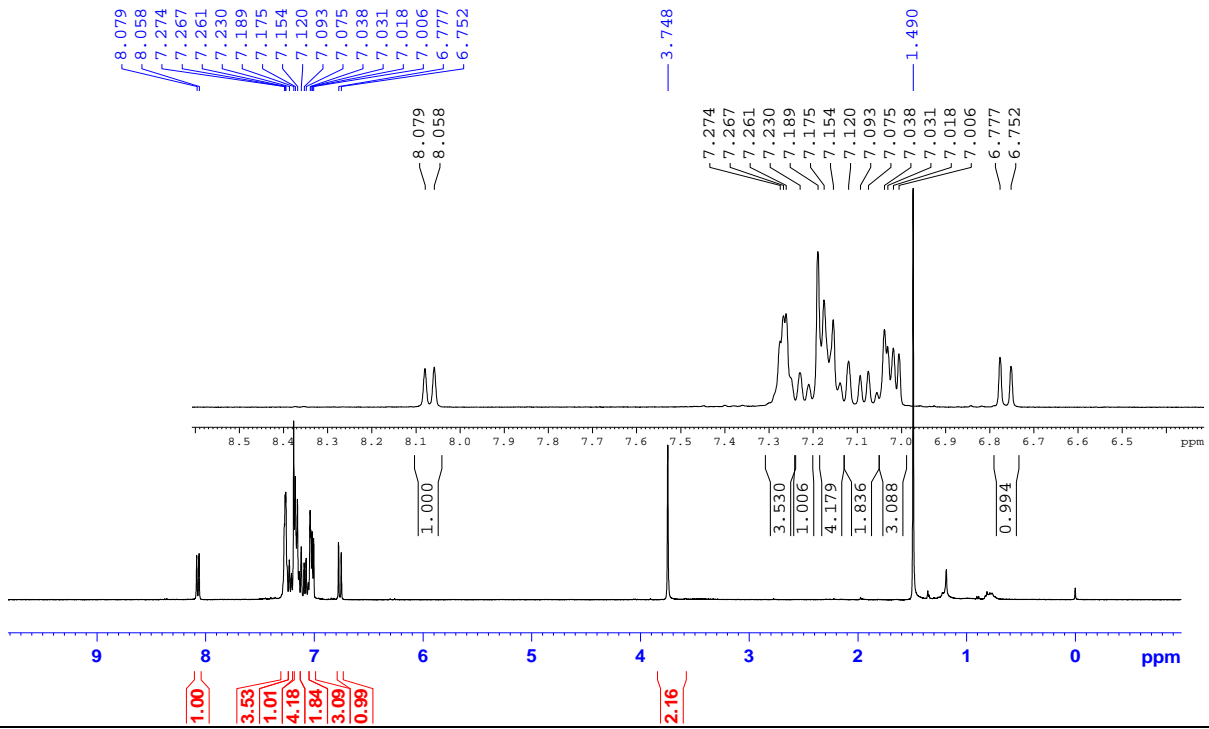

Signature SIF VIT VELLORE  
MA-PH-4CL-SEC-PROP

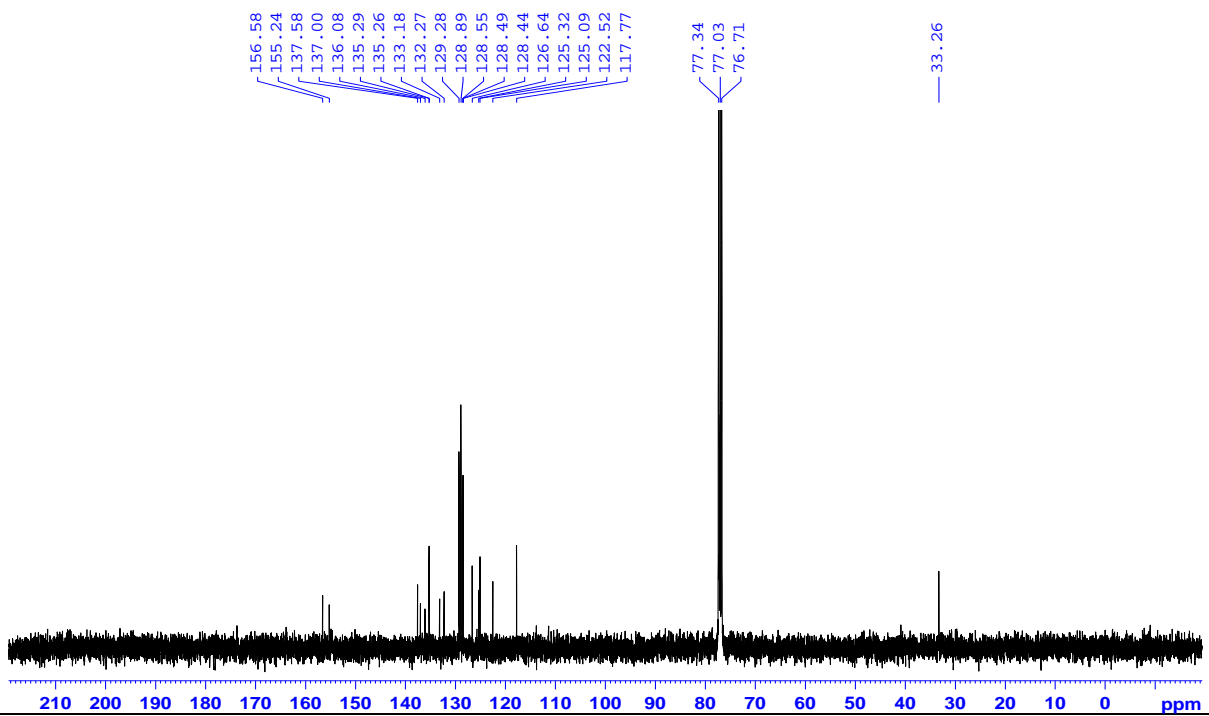

# <sup>1</sup>H NMR and <sup>13</sup>C NMR of **8ao**

Signature SIF VIT VELLORE  
MA-PH-4BR-SEC-PROP-OL

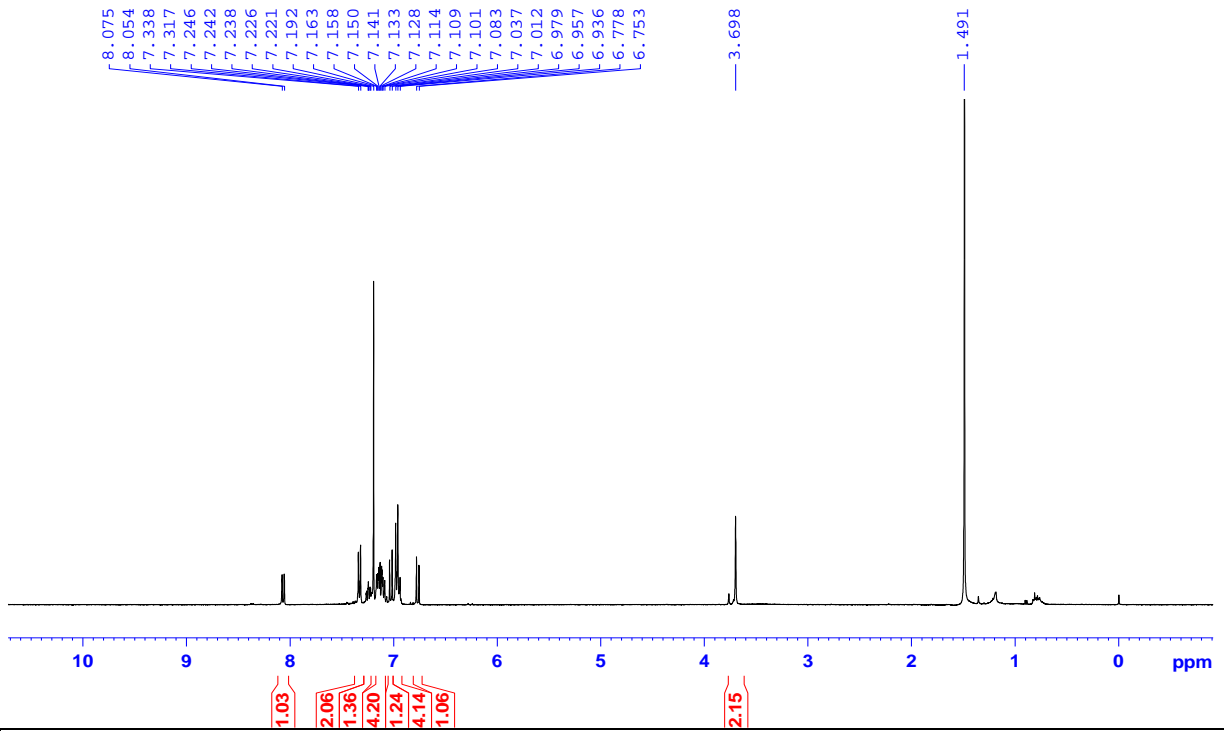

Signature SIF VIT VELLORE  
ma-ph-4br-sec-prop

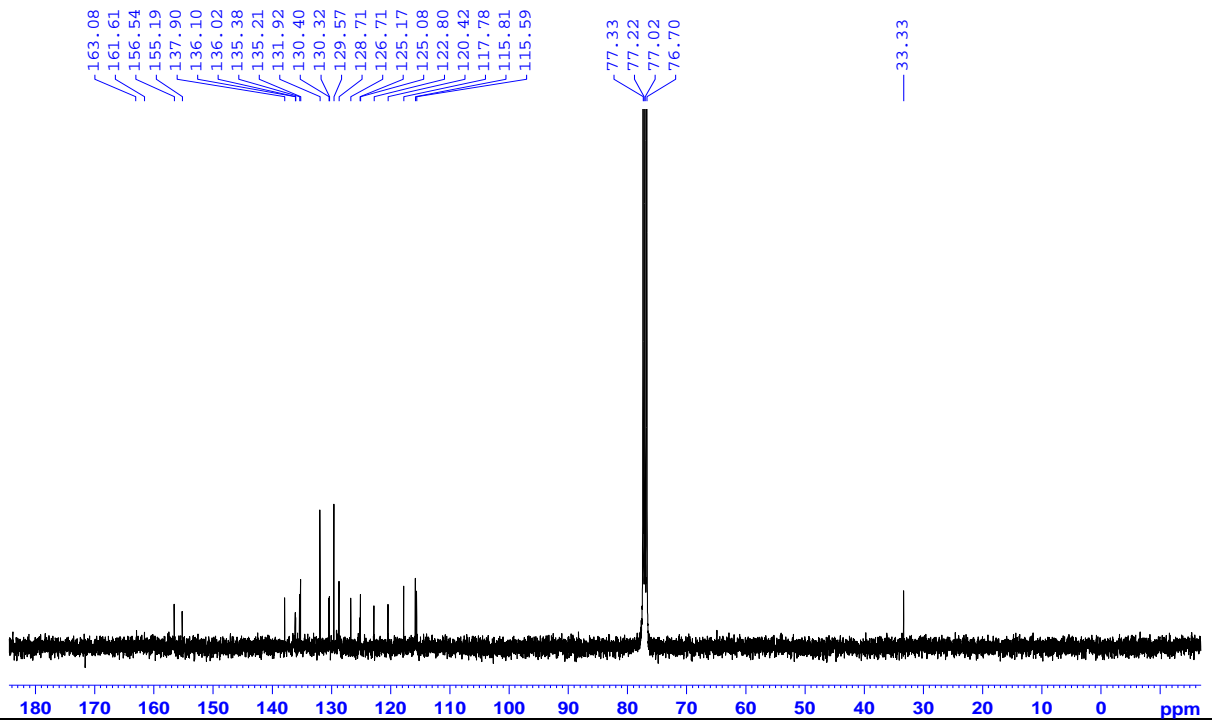

<sup>19</sup>F NMR of **8ao**

Signature SIF VIT VELLORE  
MA-PH-4BR-SEC-PROP

-111.29  
-111.30  
-111.31  
-111.32  
-111.33  
-111.34  
-111.35

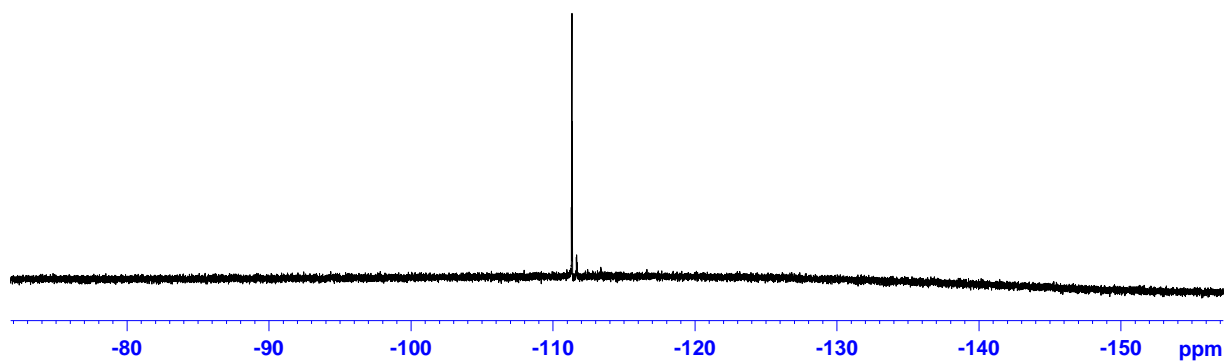

# <sup>1</sup>H NMR and <sup>13</sup>C NMR of 8ap

Signature SIF VIT VELLORE  
4F-IBU-SEC-MA-PH

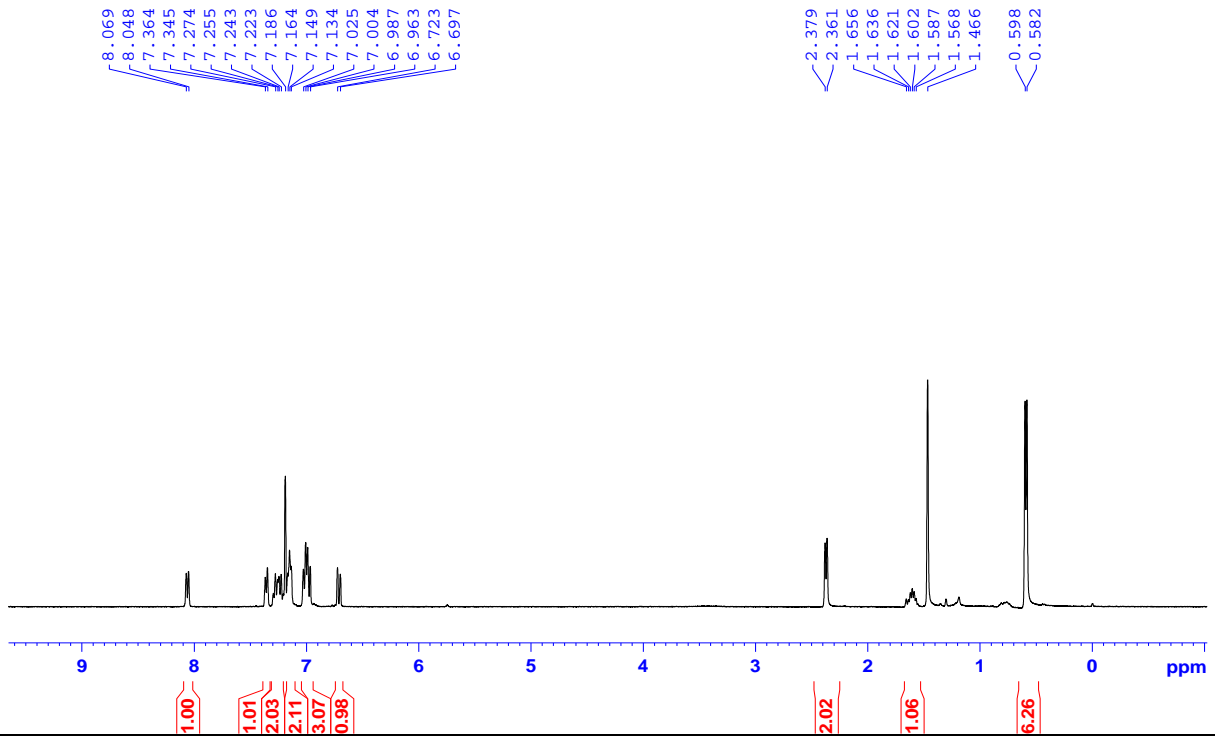

Signature SIF VIT VELLORE  
4F-IBU-2SEC-MA-PH

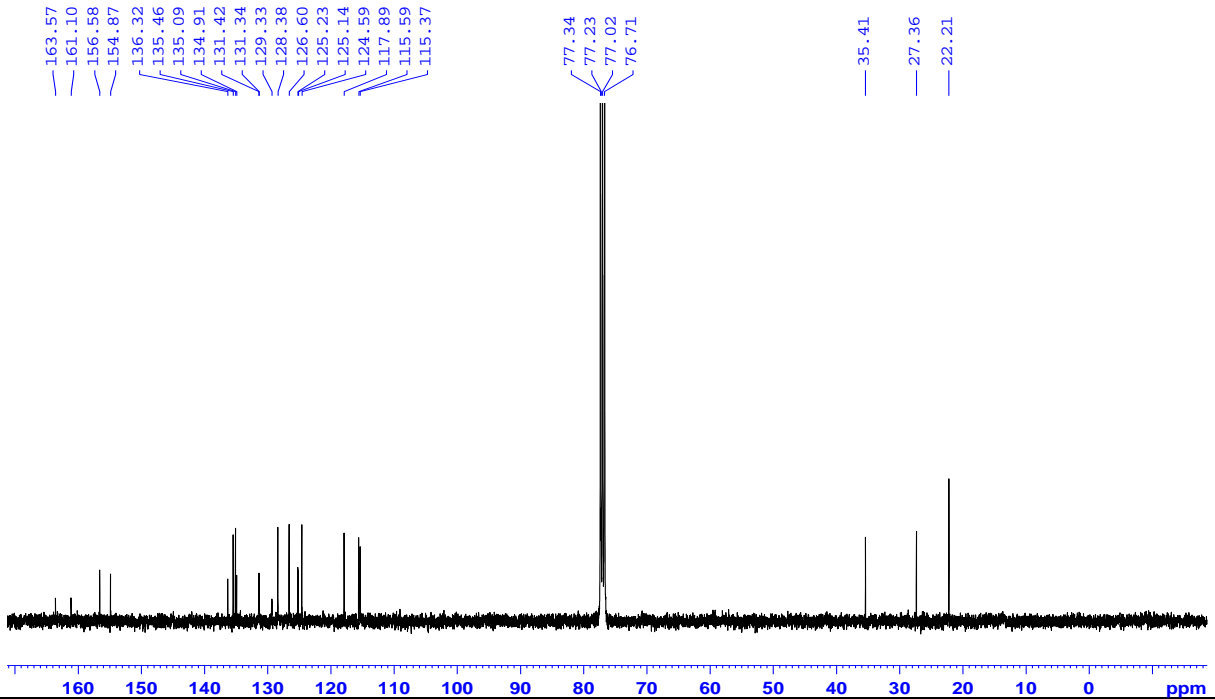

<sup>19</sup>F NMR of **8ap**

Signature SIF VIT VELLORE  
4F-IBU-SEC-MA-PH

-112.25  
-112.26  
-112.27

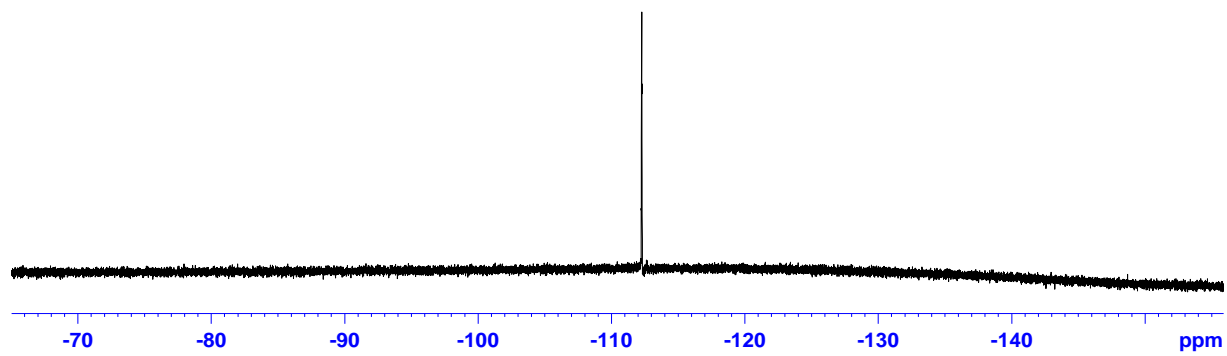

# Cycloruthenated complex 1cr

Signature SIF VIT VELLORE  
PTHA-PCYM

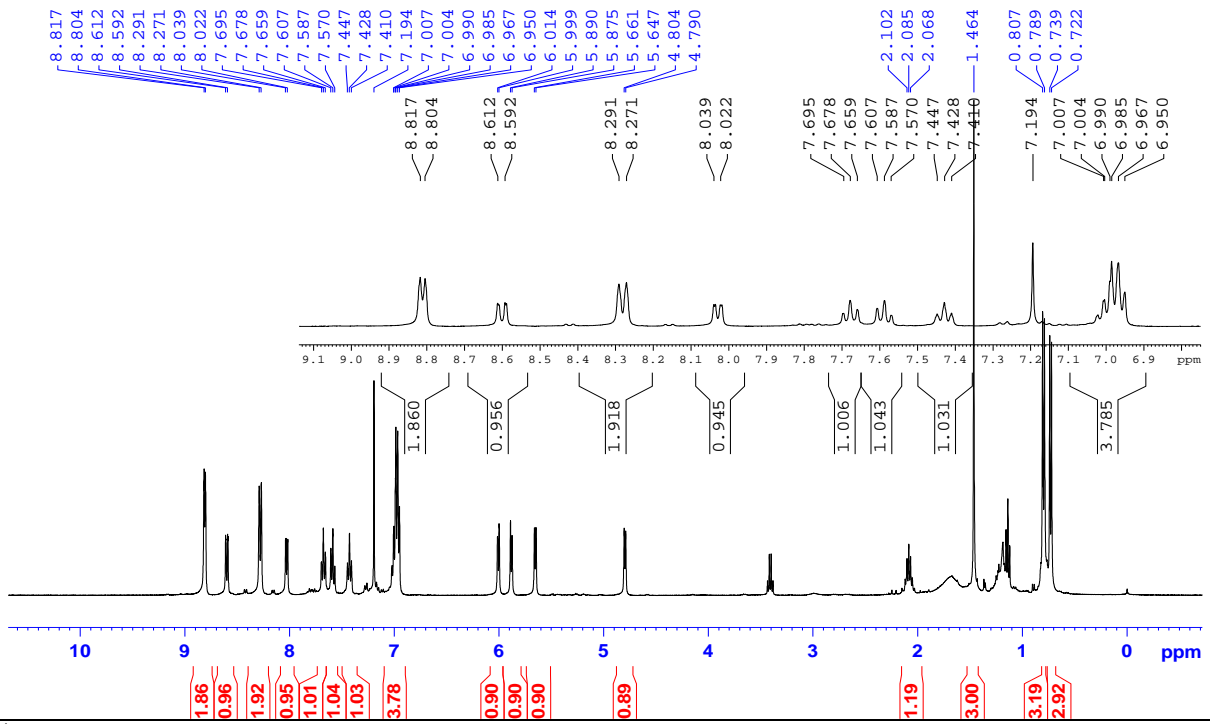

Signature SIF VIT VELLORE  
PTHA-PCYM

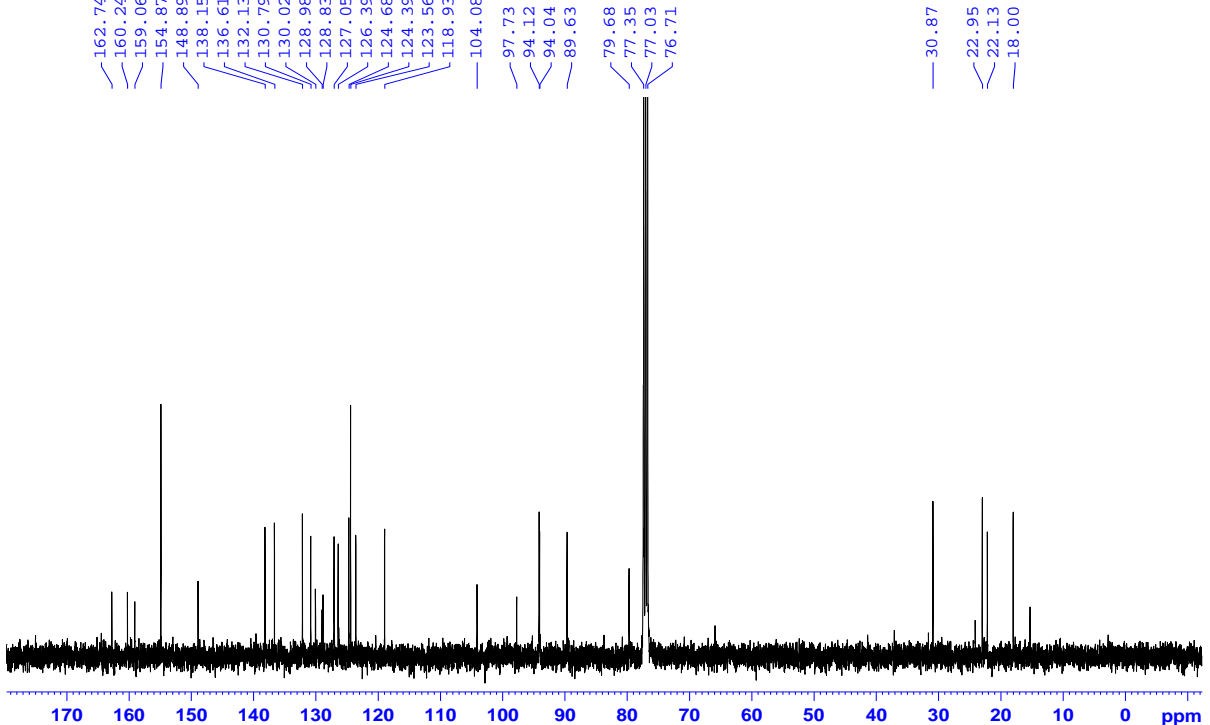



# Cycloruthenated complex 4cr

Signature SIF VIT VELLORE  
MA=PH-PCYM

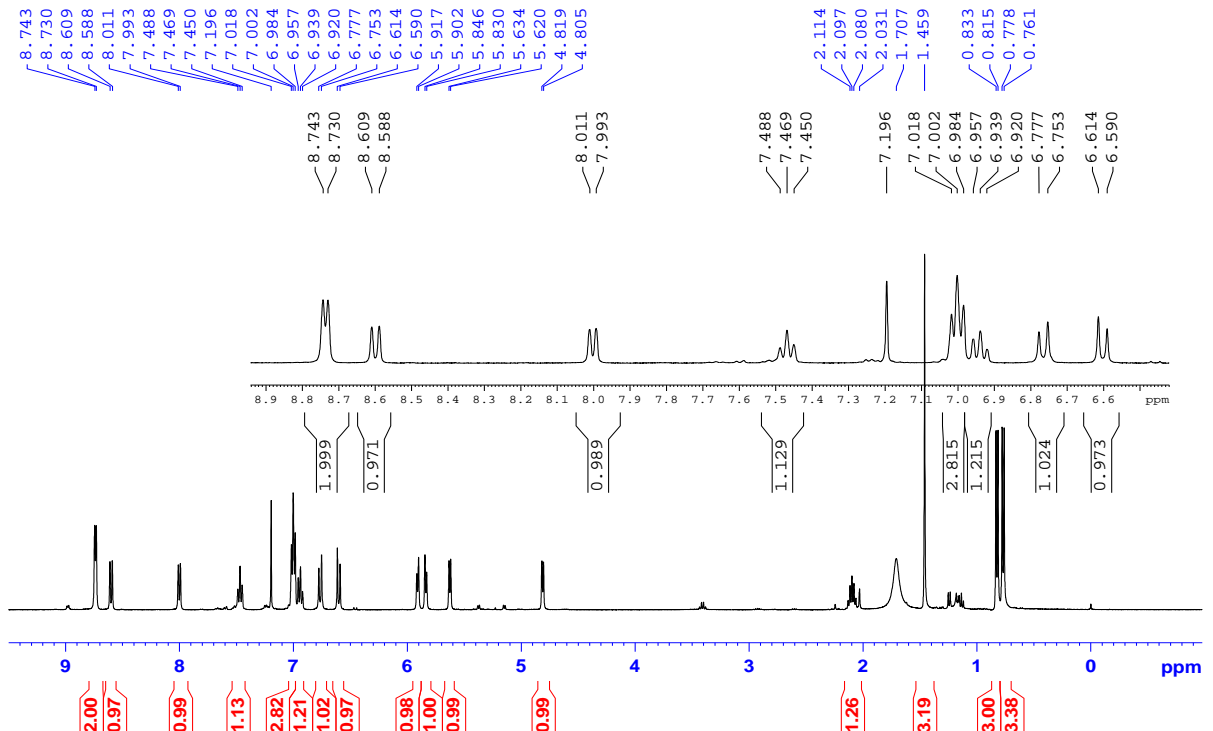

Signature SIF VIT VELLORE  
MA=PH-PCYM

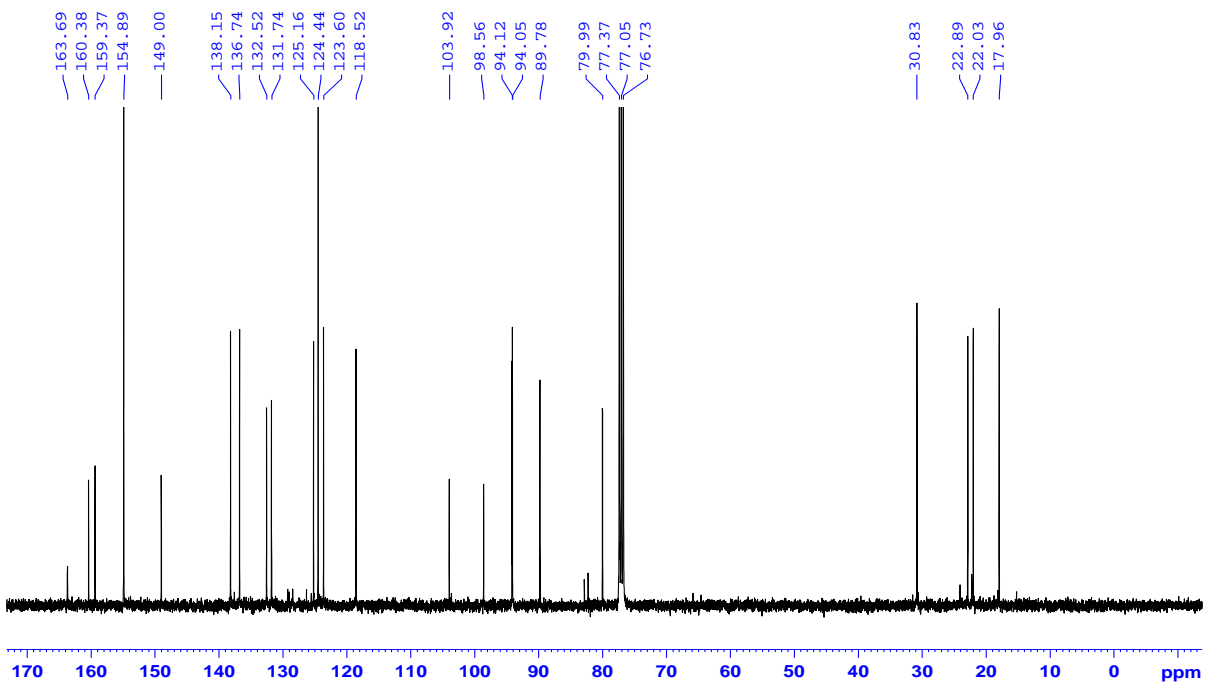

## NOE Spectrum of **3aa**

Signature SIF VIT VELLORE  
PH-PTHA-PROP-OL

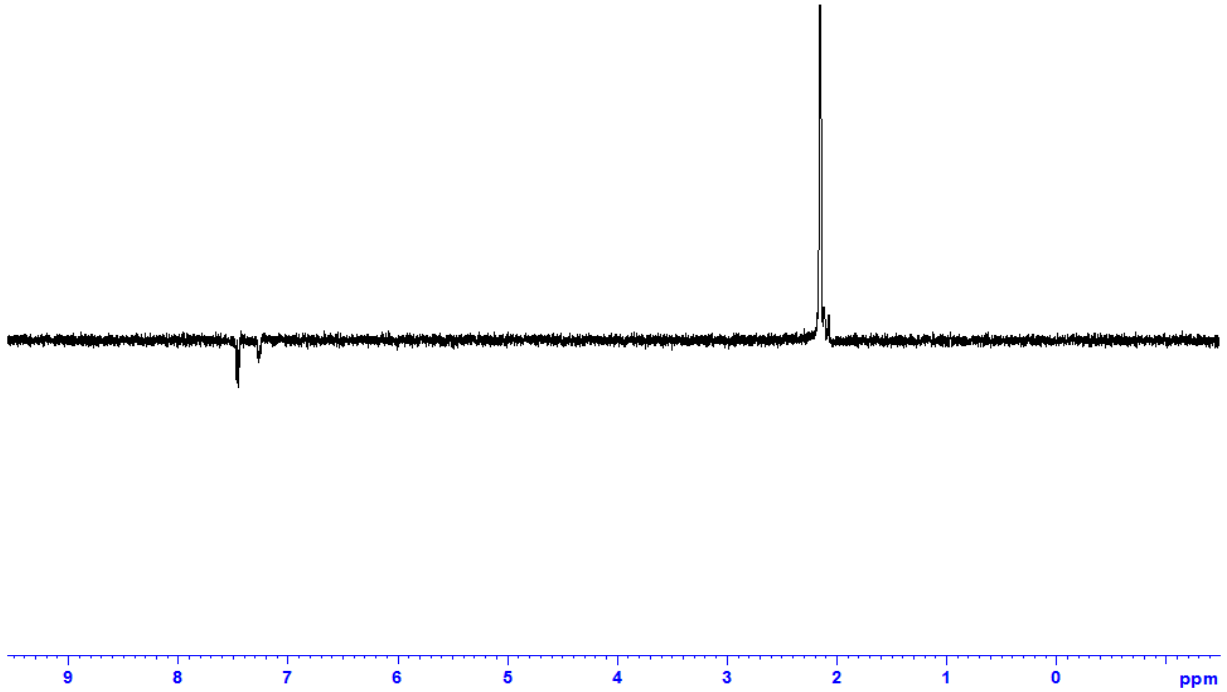

## NOESY Spectrum of **3aa**

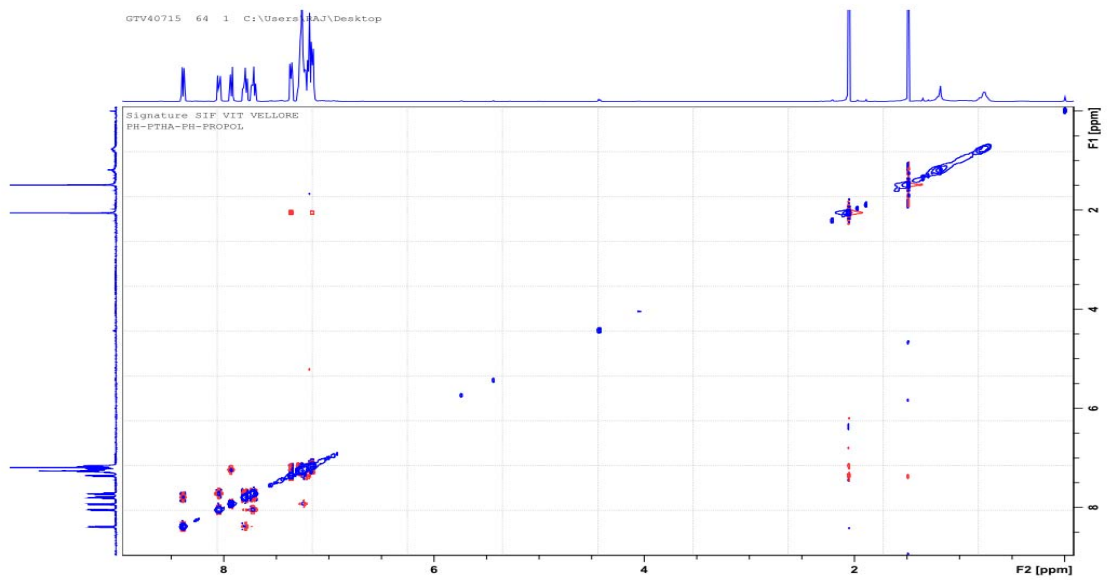

### NOESY Expanded Spectrum of **3aa**

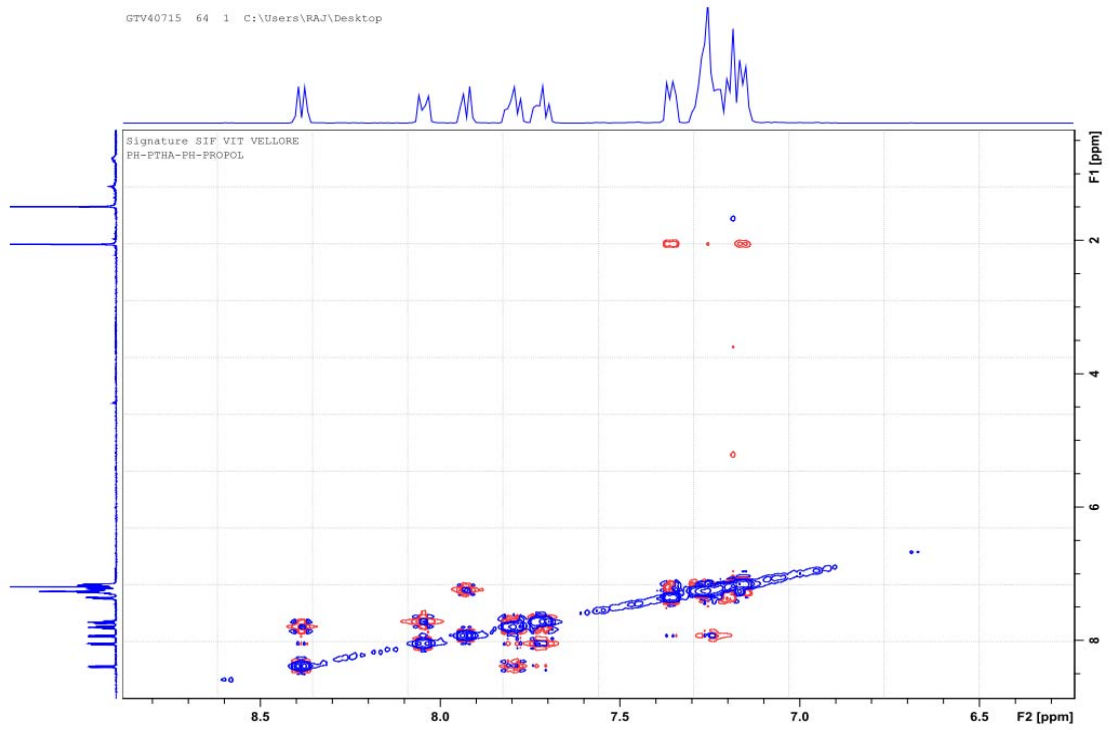

### NOESY Spectrum of **3ac**

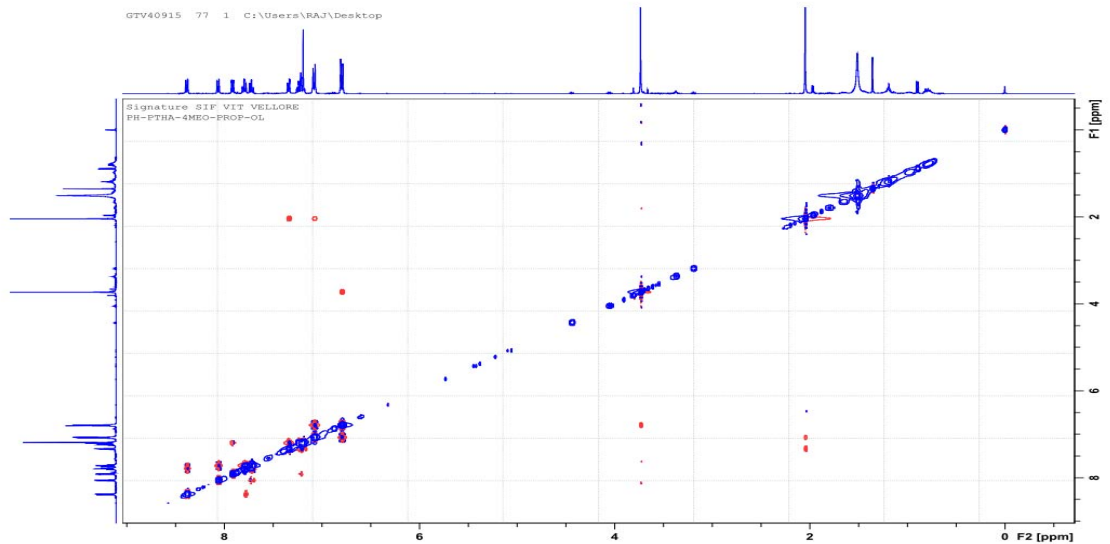

## NOESY Expanded Spectrum of **3ac**

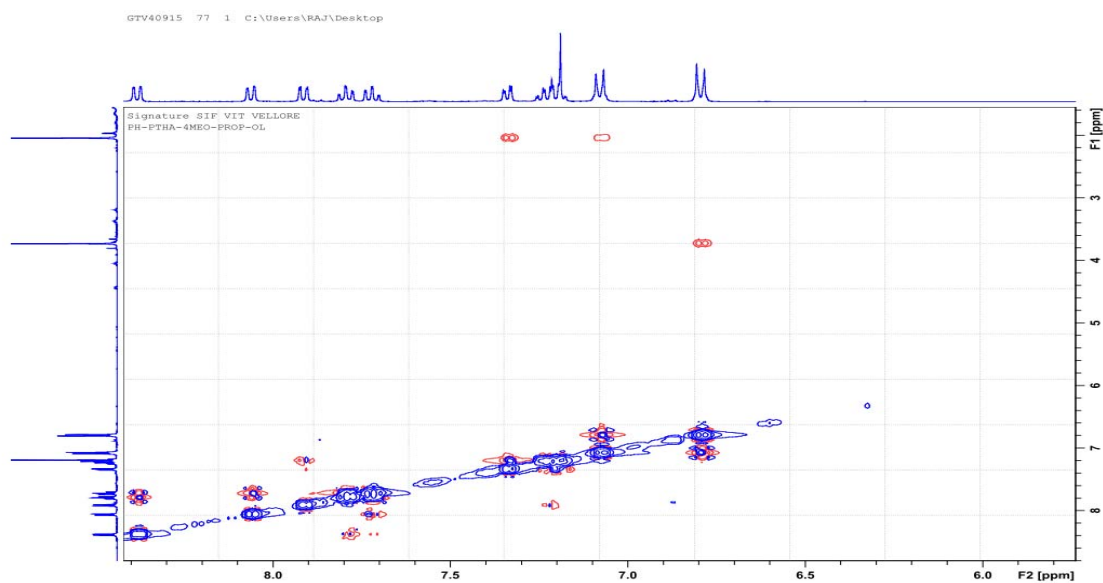

## NOESY Spectrum of **3af**

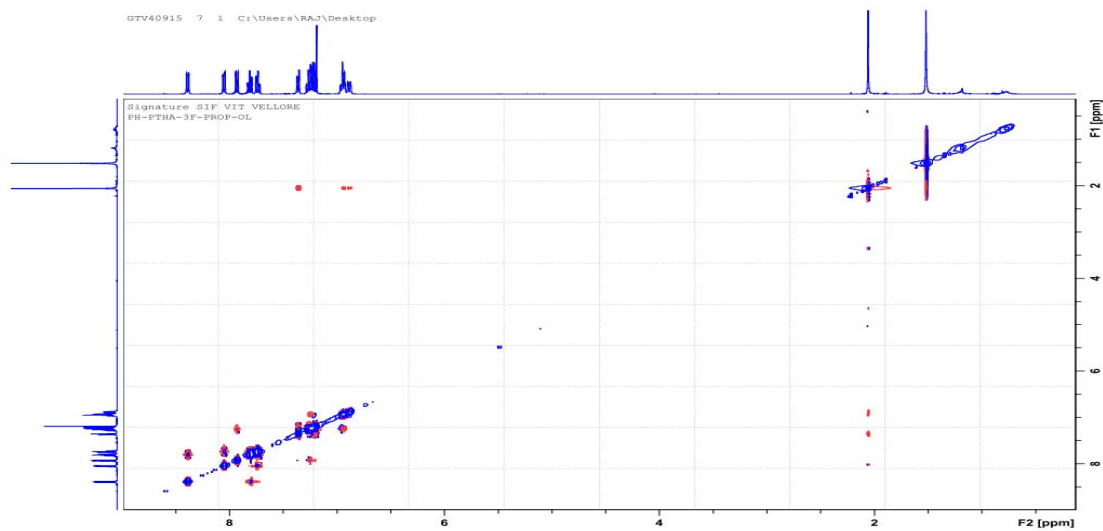

### NOESY Expanded Spectrum of **3af**

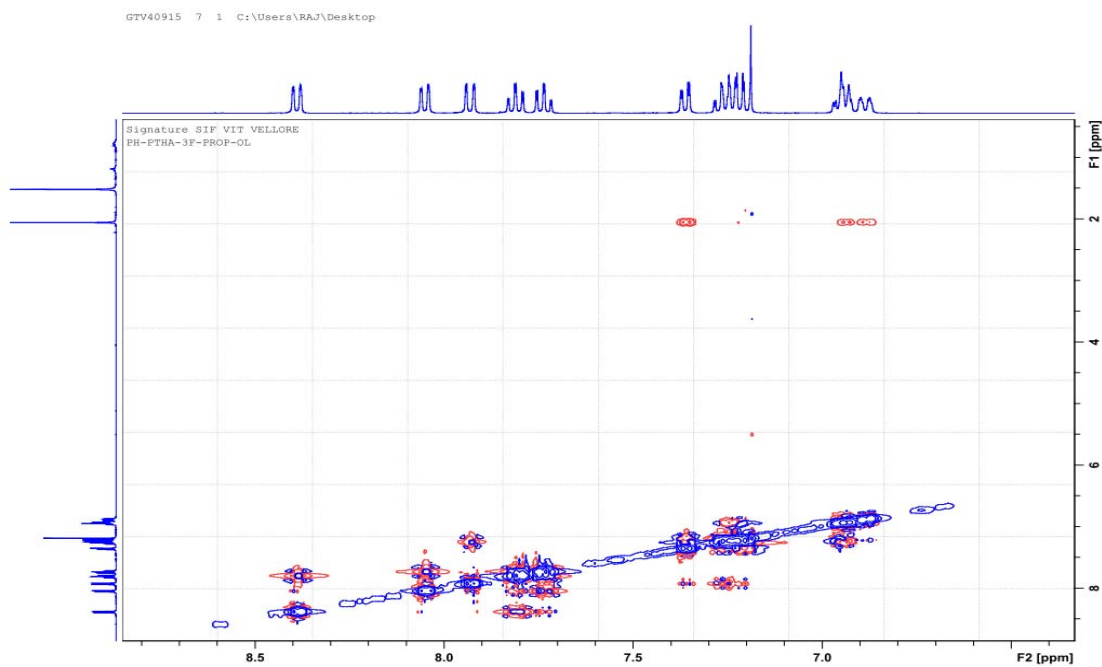

### NOESY Spectrum of **3ag**

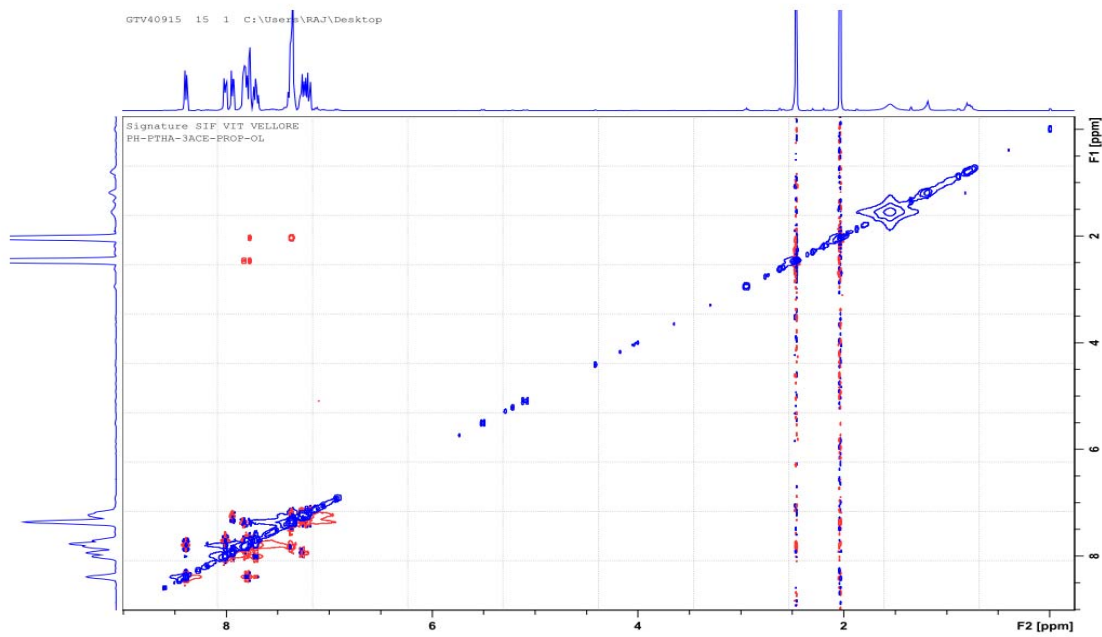

### NOESY Spectrum of **3ak**

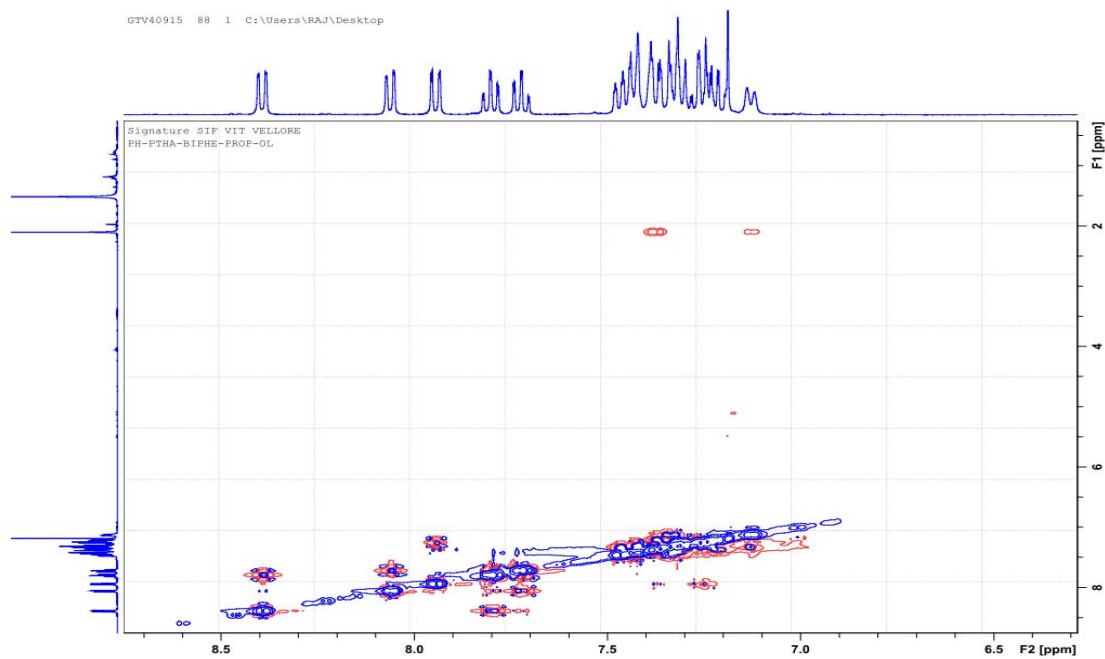

### NOESY Spectrum of **3da**

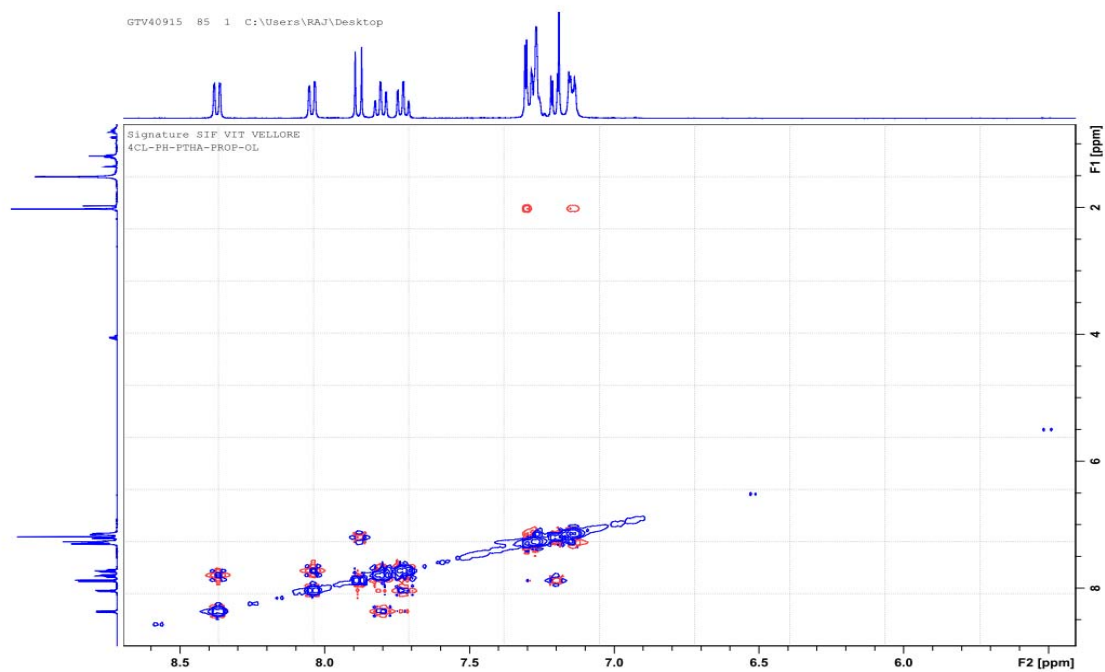

### NOESY Spectrum of **3fa**

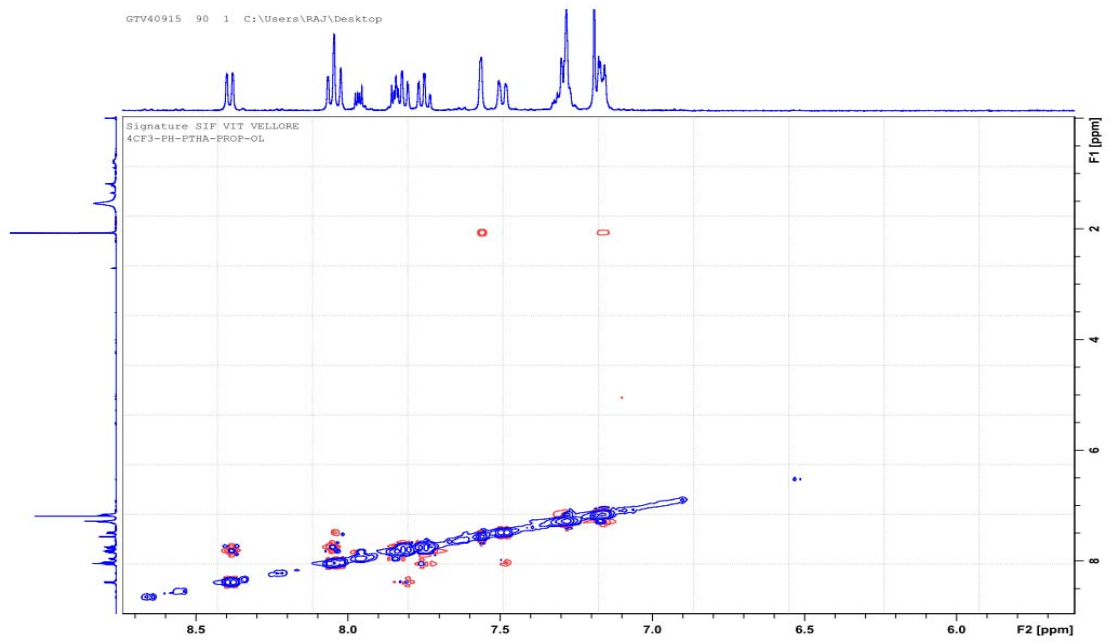

### NOE Spectrum of **3cf**

Signature SIF VIT VELLORE  
4F-MA-PH-3F-PROP-OL

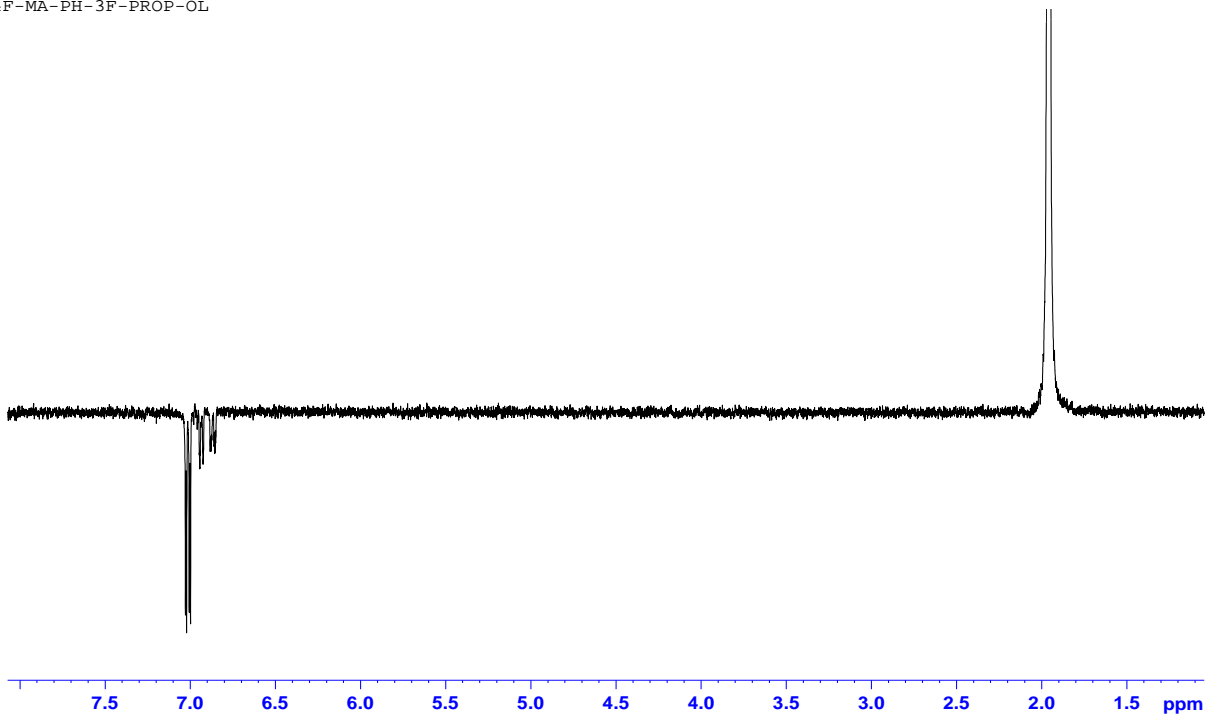

### NOESY Spectrum of **3cf**

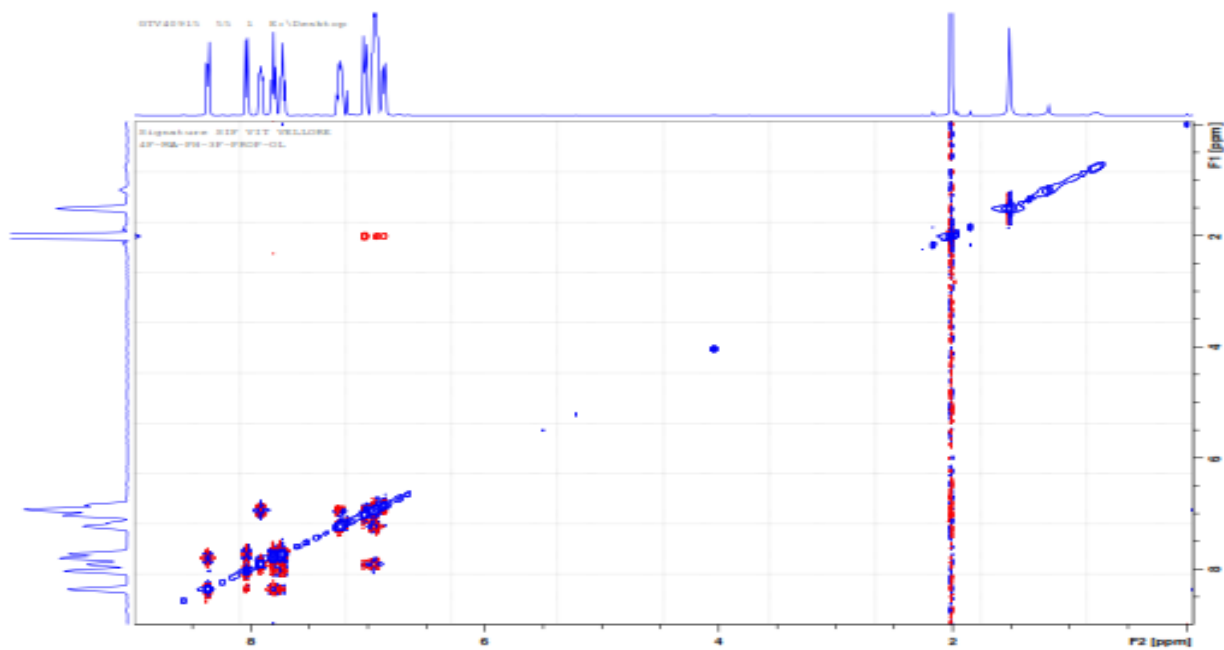

### NOESY Spectrum of **3ha**

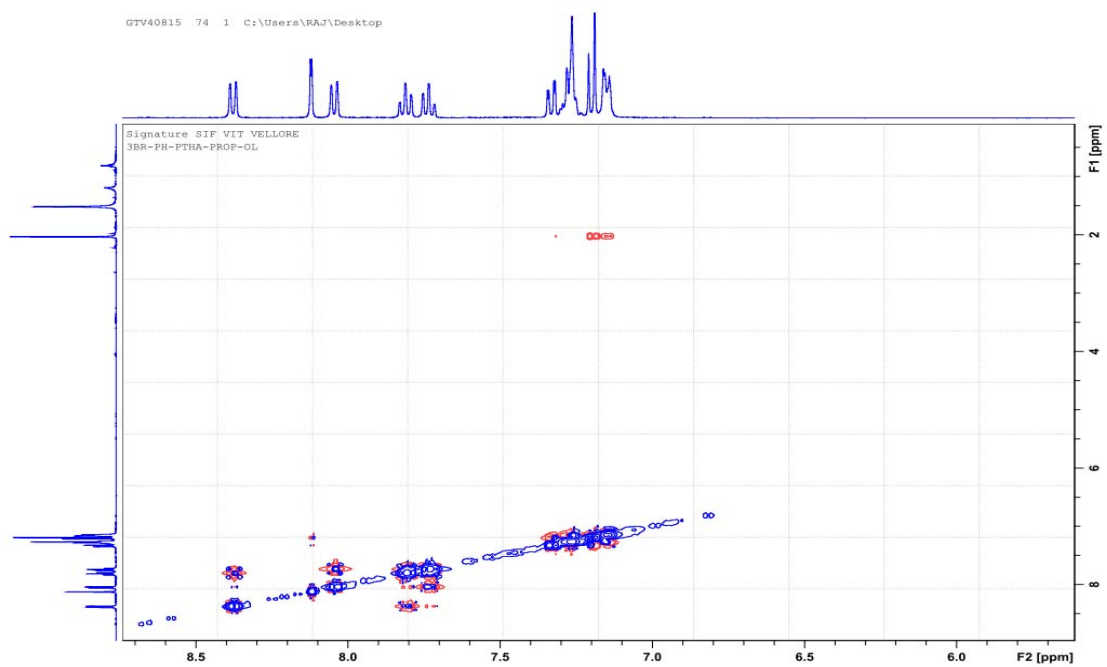



## NOESY Spectrum of **3ia**

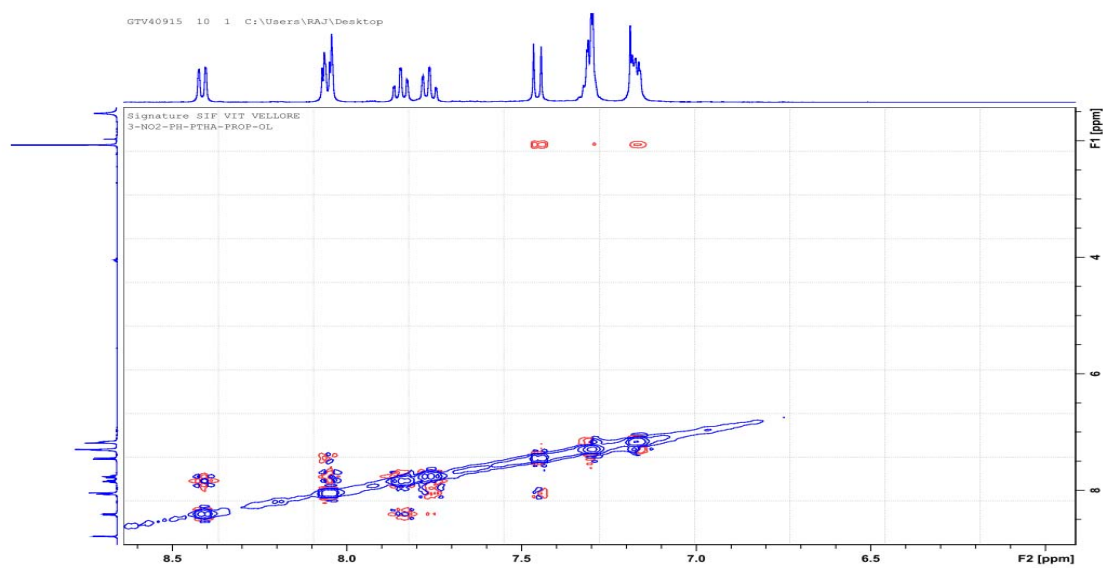

## NOE Spectrum of **5aa**

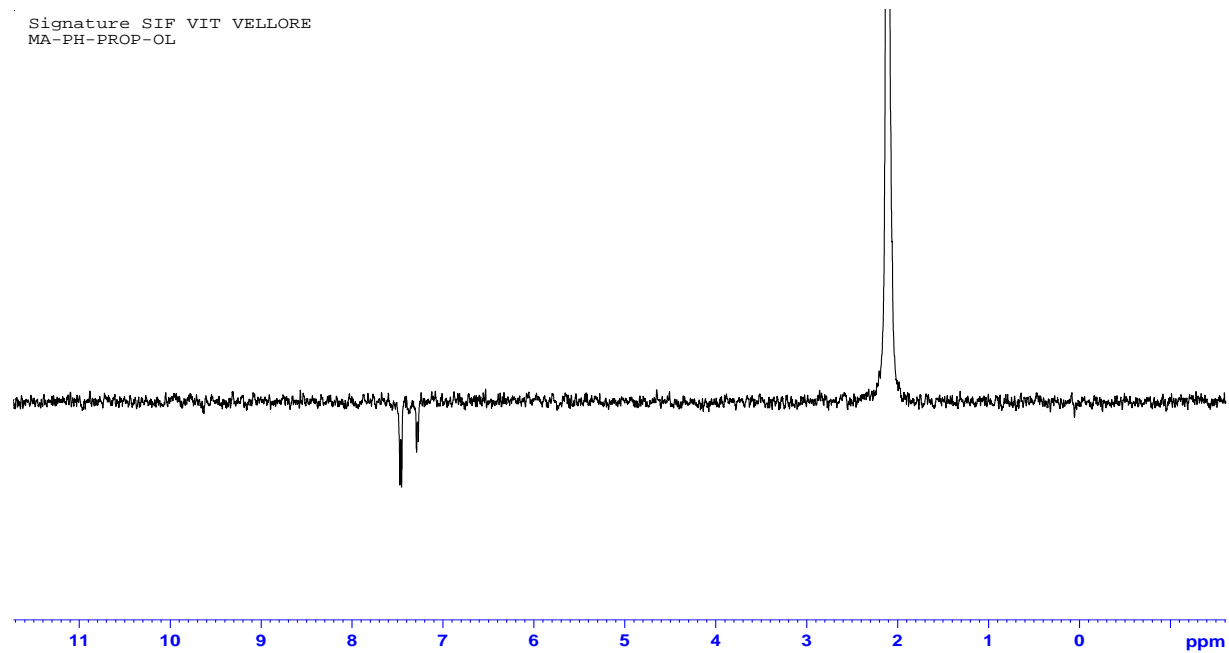

NOESY Spectrum of **5aa**

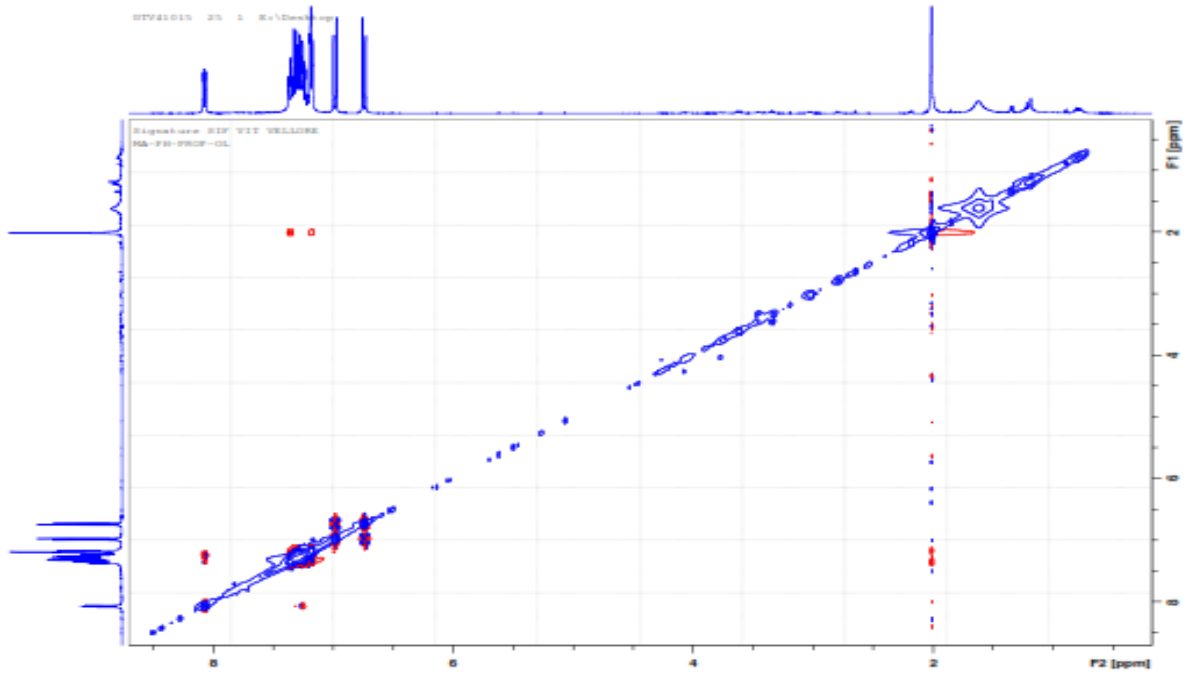

NOESY Spectrum of **5ac**

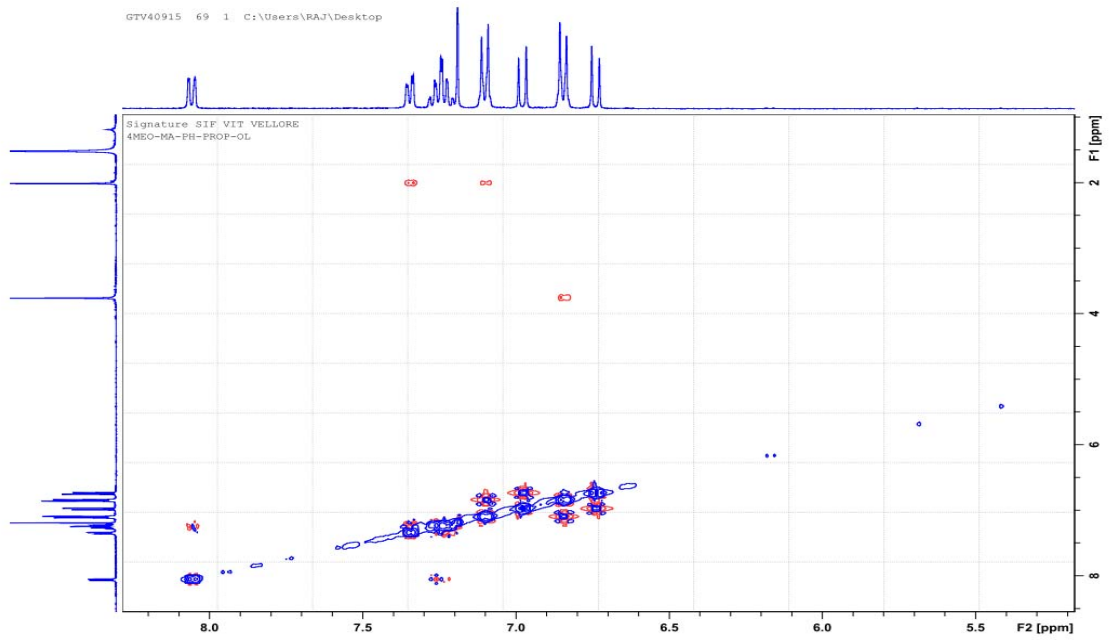

### NOESY Spectrum of **5ae**

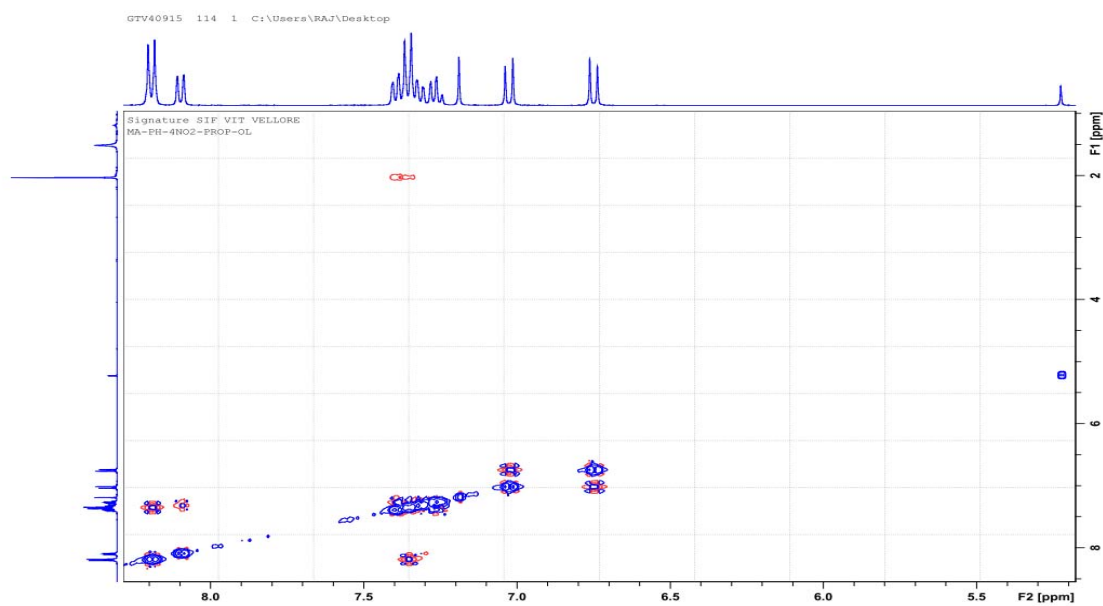

### NOESY Spectrum of **5af**

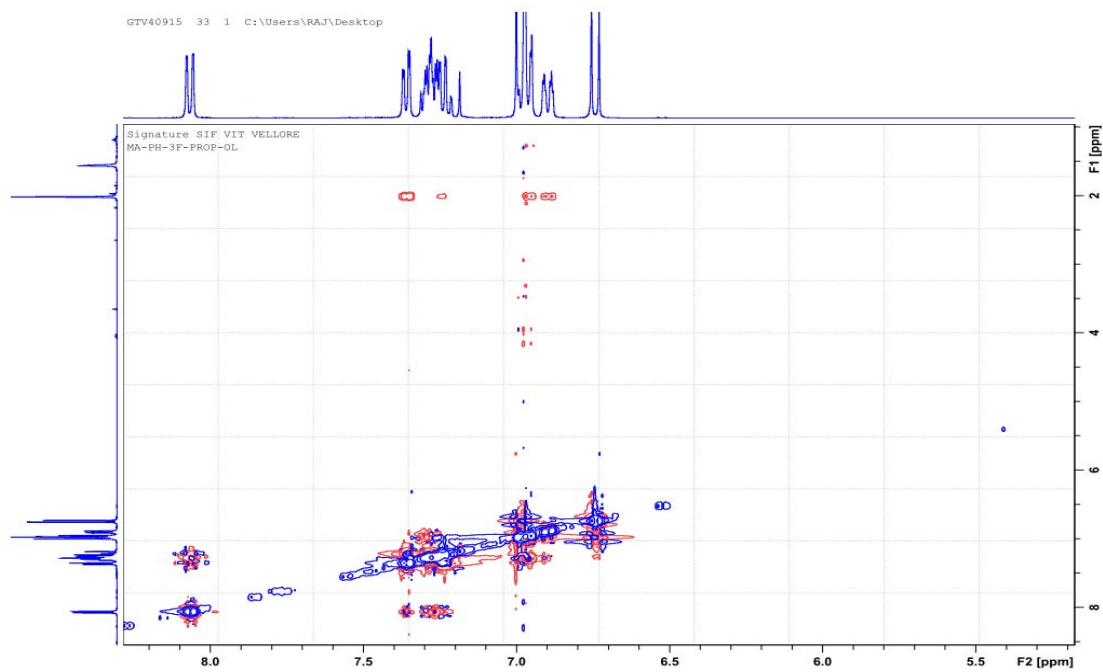

### NOESY Spectrum of **5da**

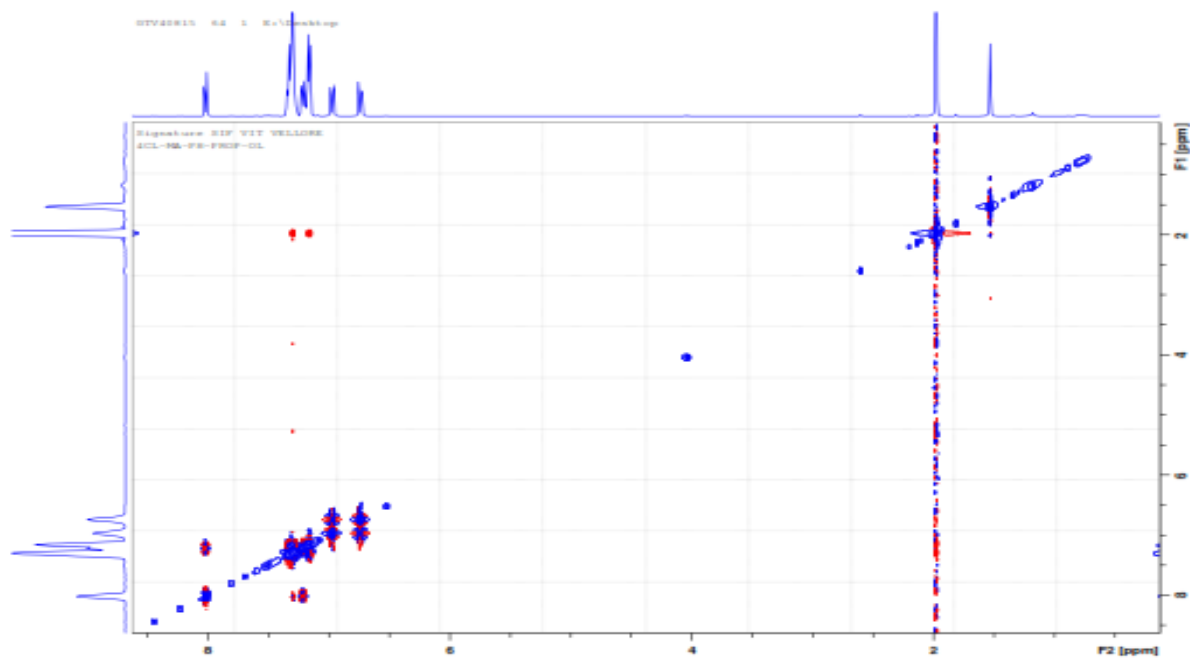

### NOE Spectrum of **5cf**

Signature SIF VIT VELLORE  
4F-MA-PH-3F-PROP-OL

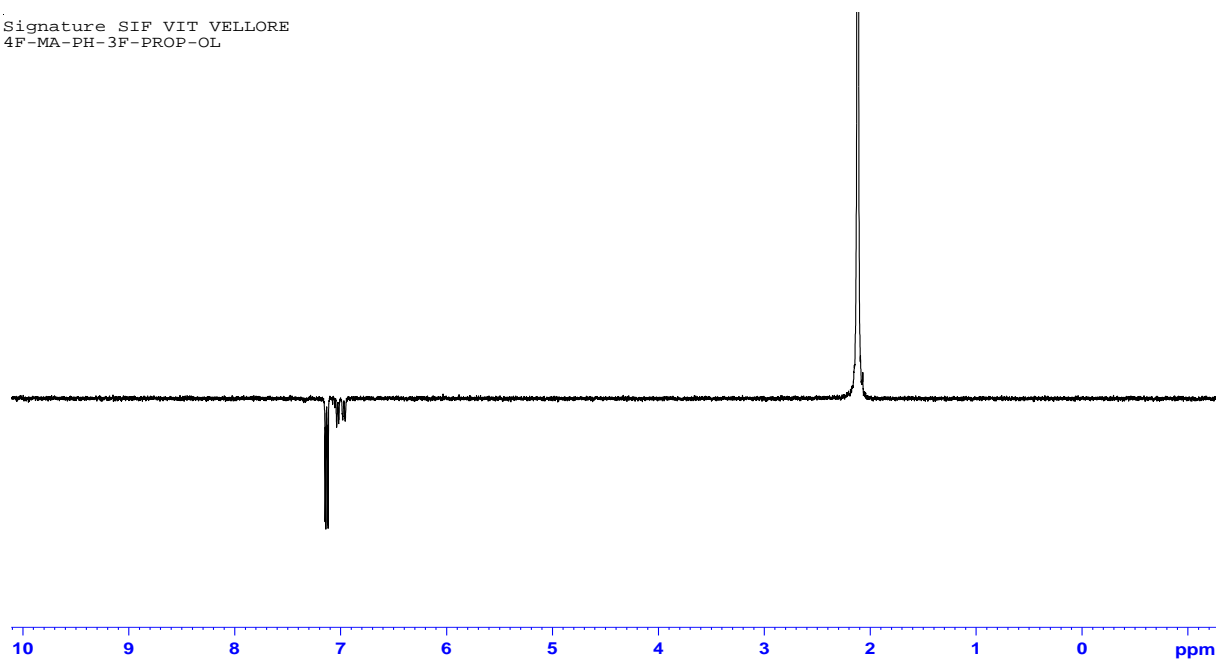

### NOESY Spectrum of **5cf**

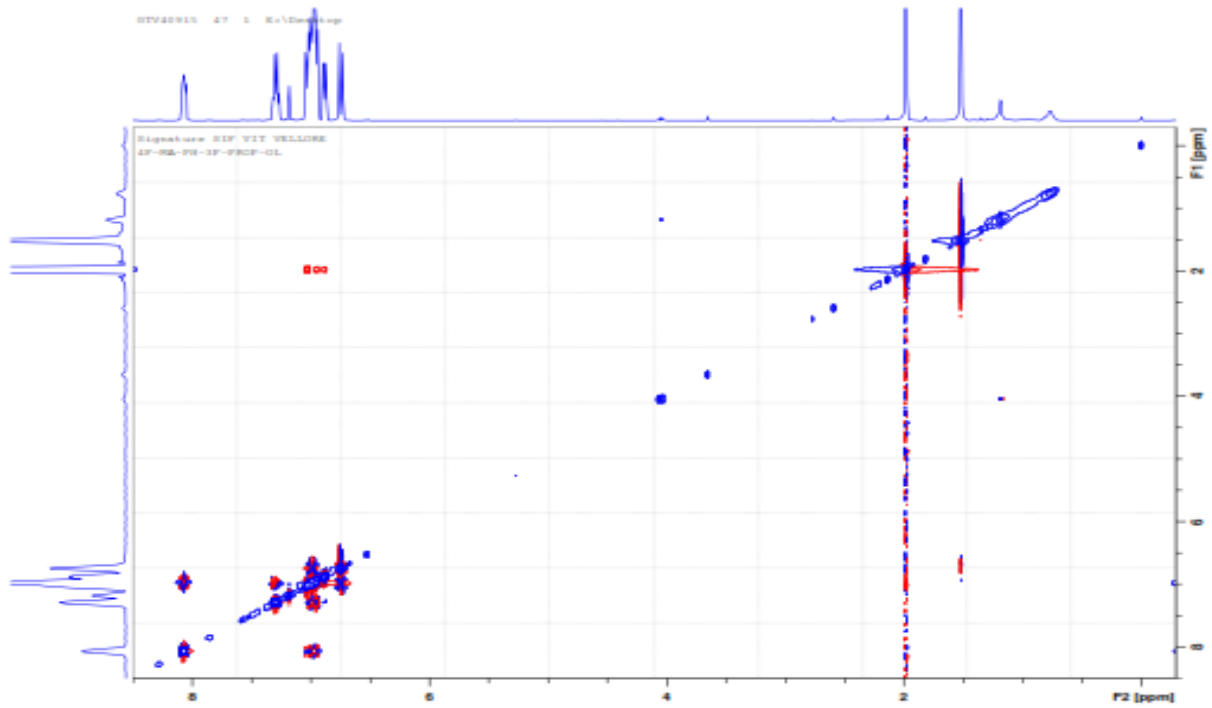

### NOESY Spectrum of **5ha**

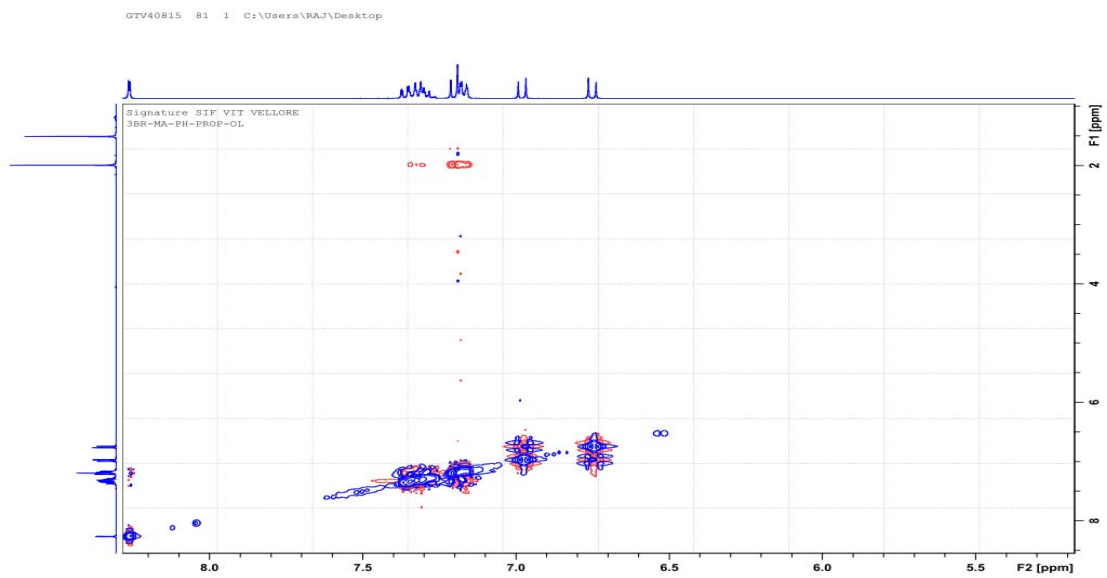

### NOESY Spectrum of **5ia**

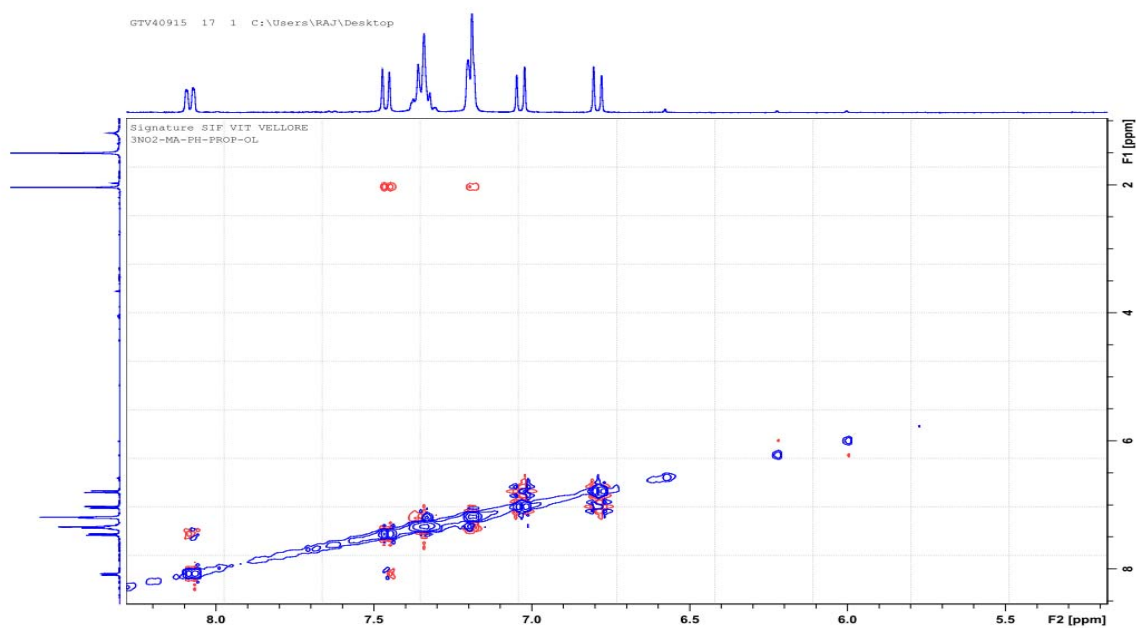

### NOESY Spectrum of **7al**

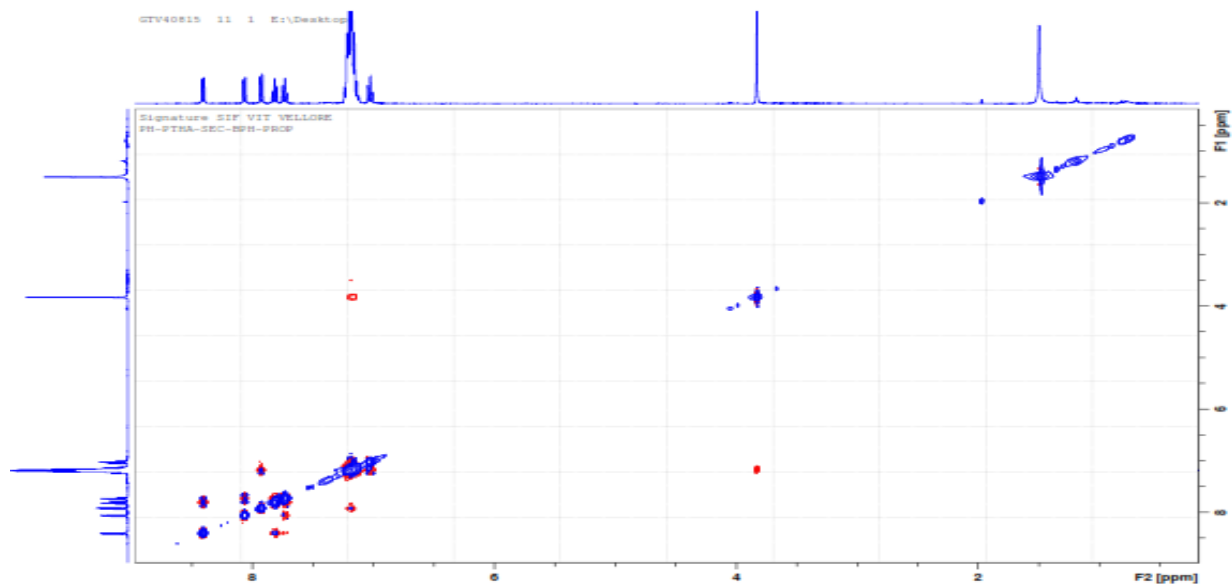

NOESY Spectrum of **8al**

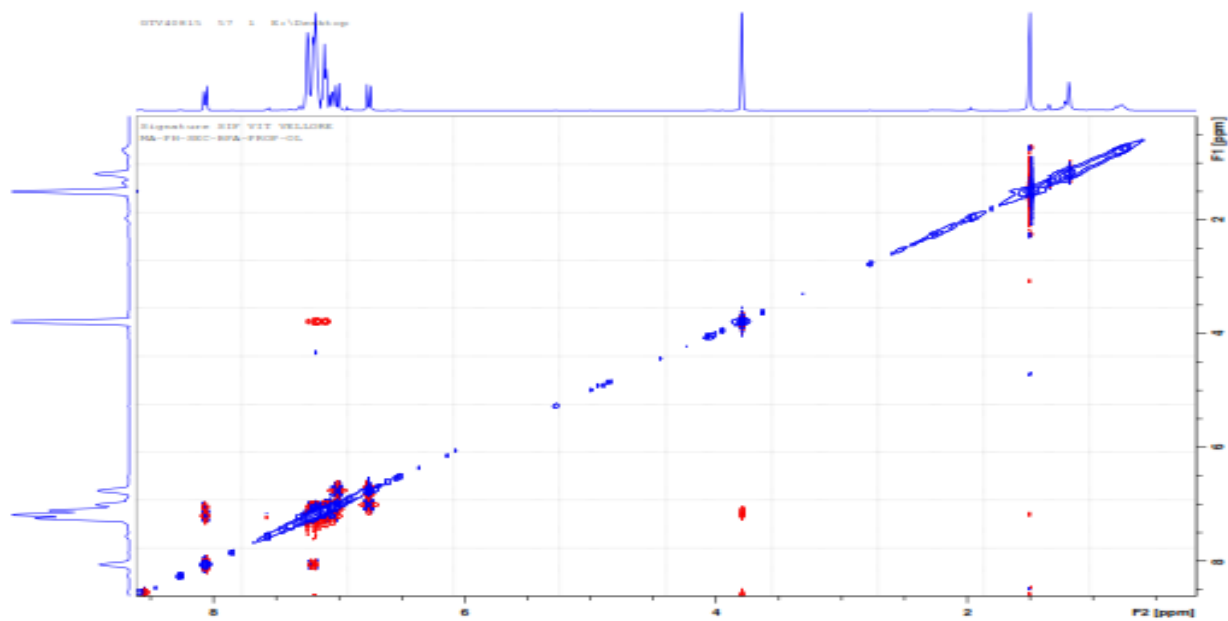

NOESY Spectrum of **8an**

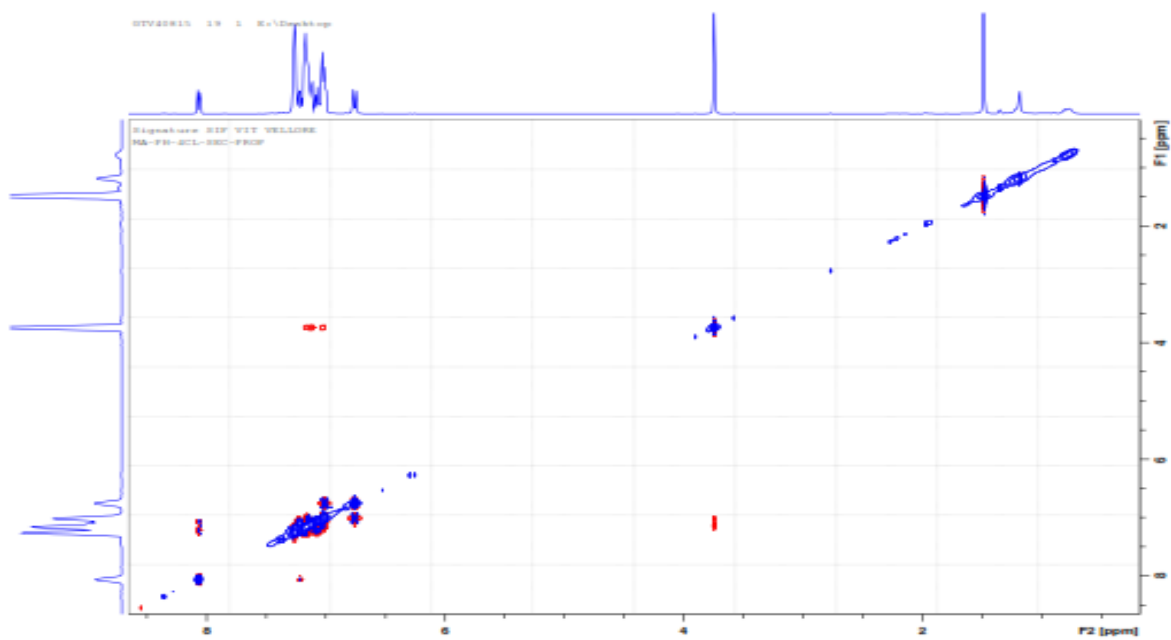

# NOESY Spectrum of $\delta$ ap

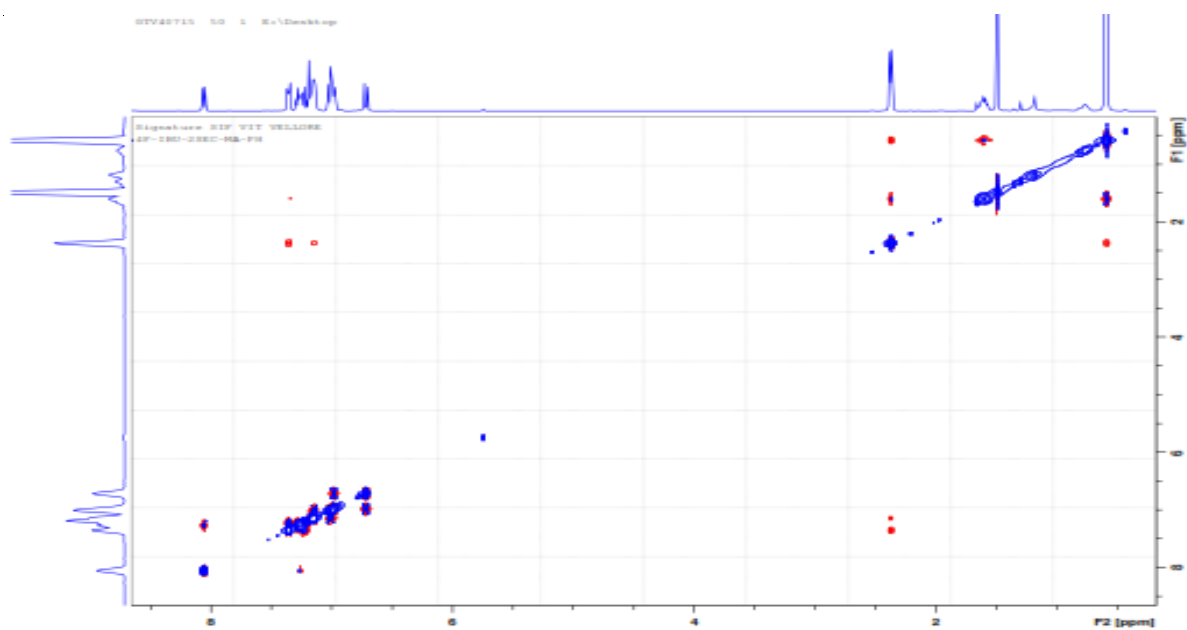



**Figure S1:** Crystal data and structure refinement for **3ae**

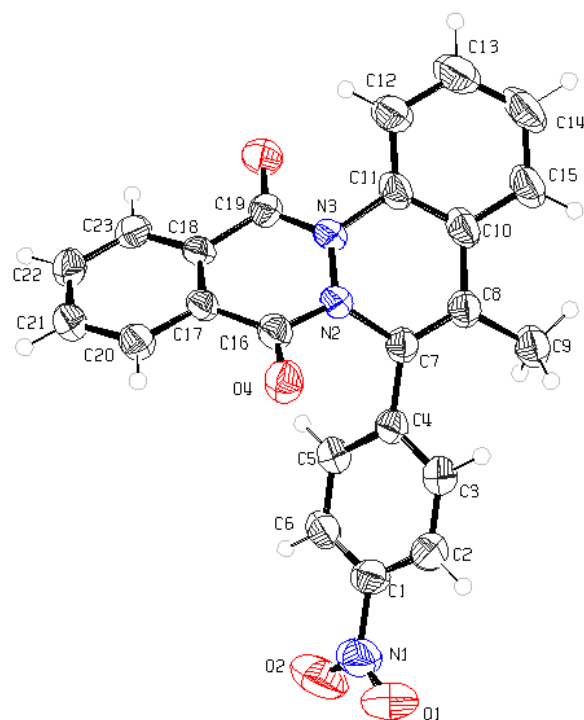

| CCDC number                                          | CCDC1434966                                                   |
|------------------------------------------------------|---------------------------------------------------------------|
| Formula                                              | C <sub>23</sub> H <sub>15</sub> N <sub>3</sub> O <sub>4</sub> |
| Formula weight                                       | 397.38                                                        |
| Color                                                | Yellow                                                        |
| Temperature/K                                        | 293(2)                                                        |
| Radiation                                            | MoK $\alpha$                                                  |
| Wavelength/ $\text{\AA}$                             | 0.71073                                                       |
| Crystal system                                       | monoclinic                                                    |
| Space group                                          | 'P 21/c'                                                      |
| <i>a</i> ( $\text{\AA}$ )                            | 22.748(6)                                                     |
| <i>b</i> ( $\text{\AA}$ )                            | 10.773(3)                                                     |
| <i>c</i> ( $\text{\AA}$ )                            | 15.613(4)                                                     |
| $\alpha$ ( $^\circ$ )                                | 90                                                            |
| $\beta$ ( $^\circ$ )                                 | 102.346(8)                                                    |
| $\gamma$ ( $^\circ$ )                                | 90                                                            |
| Volume ( $\text{\AA}^3$ )                            | 3737.7(17)                                                    |
| <i>Z</i>                                             | 8                                                             |
| Density (g/ml)                                       | 1.412                                                         |
| $\mu$ (1/mm)                                         | 0.099                                                         |
| <i>F</i> (000)                                       | 1648                                                          |
| $\theta$ (min, max)                                  | 2.101, 28.619                                                 |
| No. of unique reflns                                 | 9084                                                          |
| No. of parameters                                    | 541                                                           |
| <i>R</i> <sub>obs</sub> , <i>wR</i> <sub>2_obs</sub> | 0.2069, 0.1076                                                |

**Figure S2:** Crystal data and structure refinement for **8am**

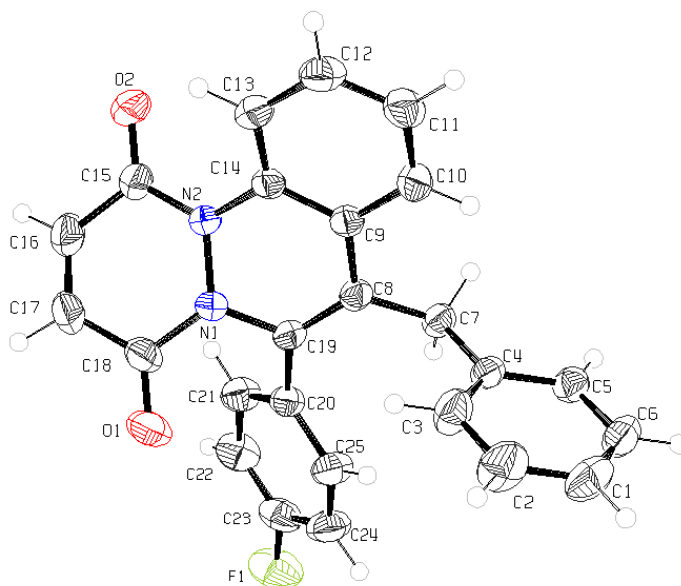

|                                                      |                                                                |
|------------------------------------------------------|----------------------------------------------------------------|
| <b>CCDC number</b>                                   | <b>CCDC1434961</b>                                             |
| Formula                                              | C <sub>25</sub> H <sub>17</sub> FN <sub>2</sub> O <sub>2</sub> |
| Formula weight                                       | 396.40                                                         |
| Color                                                | Dark red                                                       |
| Temperature/K                                        | 293(2)                                                         |
| Radiation                                            | MoK $\alpha$                                                   |
| Wavelength/Å                                         | 0.71073                                                        |
| Crystal system                                       | monoclinic                                                     |
| Space group                                          | 'P 21/c'                                                       |
| <i>a</i> (Å)                                         | 10.9284(9)                                                     |
| <i>b</i> (Å)                                         | 18.6077(14)                                                    |
| <i>c</i> (Å)                                         | 10.9054(8)                                                     |
| $\alpha$ (°)                                         | 90                                                             |
| $\beta$ (°)                                          | 118.516(2)                                                     |
| $\gamma$ (°)                                         | 90                                                             |
| Volume (Å <sup>3</sup> )                             | 1948.6(3)                                                      |
| <i>Z</i>                                             | 4                                                              |
| Density (g/ml)                                       | 1.351                                                          |
| $\mu$ (1/mm)                                         | 0.093                                                          |
| <i>F</i> (000)                                       | 824                                                            |
| $\theta$ (min, max)                                  | 2.121, 28.310                                                  |
| No. of unique reflns                                 | 4838                                                           |
| No. of parameters                                    | 271                                                            |
| <i>R</i> <sub>obs</sub> , <i>wR</i> <sub>2_obs</sub> | 0.0493, 0.1333                                                 |

## References

1. a) M. O. Albers, E. Singleton, J. E. Yates and F. B. McCormick, *Inorg. Synth.*, 1989, **26**, 249; b) M. A. Bennett, T.-N. Huang, T. W. Matheson and A. K. Smith, *Inorg. Synth.*, 1982, **21**, 74; c) P. S. Hallman, T. A. Stephenson and G. Wilkinson, *Inorg. Synth.*, 1970, **12**, 237.
2. a) B. Li, H. Feng, N. Wang, J. Ma, H. Song, S. Xu and B. Wang, *Chem. - Eur. J.*, 2012, **18**, 12873; b) N. Wang, B. Li, H. Song, S. Xu and B. Wang, *Chem. - Eur. J.*, 2013, **19**, 358.
3. D. Poli, D. Catarzi, V. Colotta, F. Varano, G. Filacchioni, S. Daniele, L. Trincavelli, C. Martini, S. Paoletta and S. Moro, *J. Med. Chem.*, 2011, **54**, 2102.
4. J. Das, R. Mukherjee and A. Basak, *J. Org. Chem.*, 2014, **79**, 3789.
5. a) X.-R. Song, Y.-P. Han, Y.-F. Qiu, Z.-H. Qiu, X.-Y. Liu, P.-F. Xu and Y.-M. Liang, *Chem. -Eur. J.*, 2014, **20**, 12046; b) X.-R. Song, B. Song, Y.-F. Qiu, Y.-P. Han, Z.-H. Qiu, X.-H. Hao, X.-Y. Liu and Y.-M. Liang, *J. Org. Chem.*, 2014, **79**, 7616.
